# Supplementary material for: Establishment of a Colorectal Cancer-Related MicroRNA-mRNA Regulatory Network by Microarray and Bioinformatics
Source: Front Genet. 2020 Oct 23;11:560186. doi: 10.3389/fgene.2020.560186 (PMC7644864; doi:10.3389/fgene.2020.560186)
Supplement: Supplementary file 1 [file Data_Sheet_1.xlsx]

## Sheet: go bp up mRNA CA vs NC
GO.ID	Term	Ontology	Count	Pop.Hits	List.Total	Pop.Total	Fold.Enrichment	Pvalue	FDR	Enrichment.Score	Gene.Ratio	GENES
GO:0051301	cell division	Biological process	17	607	128	17653	3.8625	1.86156e-06	0.00829908	5.73012	0.132812	CKAP2//NUSAP1//ANLN//RASA1//BRCA2//ASPM//TAS2R13//KIF20B//NOTCH1//SHH//TPX2//HELLS//MAD2L1//NCAPG//FAM83D//CCNA2//CCND2
GO:0022402	cell cycle process	Biological process	27	1408	128	17653	2.64466	2.45426e-06	0.00829908	5.61008	0.210938	MAD2L1//NUSAP1//HIRA//CEP72//CCNA2//CKAP2//ANLN//RASA1//BRCA2//NOTCH1//MAP3K20//KIF20B//ASPM//CENPN//NCAPG//TRIP13//BRCA1//TPX2//RFWD3//DNA2//RFC3//TAS2R13//FAM83D//HSP90AB1//MSX1//CCND2//GINS1
GO:0000281	mitotic cytokinesis	Biological process	6	67	128	17653	12.3505	8.97654e-06	0.0155292	5.04689	0.046875	KIF20B//ANLN//CKAP2//NUSAP1//RASA1//BRCA2
GO:0008283	cell proliferation	Biological process	33	2078	128	17653	2.19017	9.18481e-06	0.0155292	5.03693	0.257812	BRCA2//GINS1//ASPM//NOTCH1//SHH//PDX1//ROGDI//CCND2//KIF20B//FGF19//PEMT//B4GALT1//MSX1//NME1//TESC//S100A11//CDH3//IGF2BP1//SLC39A10//TFRC//RIPK2//BRCA1//HELLS//CCNA2//PPARG//WNT11//APLN//CIP2A//TPX2//POC1B//MAP3K20//TGFBI//FAM83D
GO:1903047	mitotic cell cycle process	Biological process	19	875	128	17653	2.99471	1.75798e-05	0.0237785	4.75499	0.148438	MAD2L1//NUSAP1//HIRA//CEP72//CCNA2//CKAP2//ANLN//RASA1//BRCA2//NCAPG//KIF20B//MAP3K20//TRIP13//TPX2//RFWD3//BRCA1//CCND2//GINS1//DNA2
GO:0061640	cytoskeleton-dependent cytokinesis	Biological process	6	81	128	17653	10.2159	2.68736e-05	0.0274392	4.57067	0.046875	CKAP2//NUSAP1//ANLN//RASA1//BRCA2//KIF20B
GO:0007049	cell cycle	Biological process	30	1898	128	17653	2.17989	2.88405e-05	0.0274392	4.54	0.234375	MAD2L1//NUSAP1//HIRA//DNA2//MAP3K20//CEP72//CCNA2//TPX2//CKAP2//ANLN//RASA1//BRCA2//NOTCH1//KIF20B//ASPM//CENPN//NCAPG//TRIP13//BRCA1//RFWD3//RFC3//TAS2R13//CCND2//FAM83D//HSP90AB1//MSX1//GINS1//CHAF1A//ESCO2//HELLS
GO:0016043	cellular component organization	Biological process	68	6269	128	17653	1.49596	3.2458e-05	0.0274392	4.48868	0.53125	RPS14//BRCA2//MAD2L1//NUSAP1//HIRA//ANLN//CAMSAP1//DNA2//CDH3//MSX1//WISP1//CHAF1A//HIST1H2BL//PLS3//MAP3K20//C2CD4A//HELLS//HSP90AB1//NRF1//CKAP2//TMED4//ASPM//CEP72//CENPN//NCAPG//KIF20B//TRIP13//BRCA1//NOTCH1//SHH//ATP10A//RASA1//C15ORF62//LARS//WDR5//POC1B//NME1//S100A9//CCNA2//GRPEL2//DNAJC15//COL9A1//VCAN//B4GALT1//IBSP//ITGA9//TGFBI//DCBLD2//PPARG//NDRG3//WNT11//RAP1GDS1//RFC3//GINS1//TRAF…
GO:0006260	DNA replication	Biological process	10	296	128	17653	4.65926	5.9952e-05	0.0391331	4.2222	0.078125	RFC3//DNA2//GINS1//ESCO2//S100A11//RFWD3//BRCA2//CHAF1A//NCOA6//BRCA1
GO:0032388	positive regulation of intracellular transport	Biological process	9	240	128	17653	5.17178	6.39699e-05	0.0391331	4.19402	0.0703125	HSP90AB1//SHH//ZIC1//SLC35D3//KIF20B//CDH3//PEMT//SREBF2//SELENOI
GO:0090087	regulation of peptide transport	Biological process	16	719	128	17653	3.06902	6.45422e-05	0.0391331	4.19016	0.125	S100A9//HSP90AB1//PDX1//VSNL1//SHH//ZIC1//INHBB//RHBDF2//RIPK2//TRAF2//APLN//SLC35D3//KIF20B//PEMT//SREBF2//SELENOI
GO:0048732	gland development	Biological process	12	430	128	17653	3.84876	6.94363e-05	0.0391331	4.15841	0.09375	PDX1//NOTCH1//SRD5A1//NME1//APLN//MSX1//DKK3//WNT11//SHH//B4GALT1//BRCA2//CLDN1
GO:0090316	positive regulation of intracellular protein transport	Biological process	8	192	128	17653	5.74642	7.95164e-05	0.0411063	4.09954	0.0625	HSP90AB1//SHH//ZIC1//SLC35D3//PEMT//SREBF2//SELENOI//KIF20B
GO:0048523	negative regulation of cellular process	Biological process	55	4821	128	17653	1.57338	9.41006e-05	0.0411063	4.02641	0.429688	DNA2//MAP3K20//PDX1//MAGEA1//MSX1//NOTCH1//PPARG//YEATS2//RPS14//SHH//SREBF2//DUSP4//RASA1//NME1//SLC39A10//HELLS//TESC//CAMSAP1//CKAP2//KIF20B//MAD2L1//TRIP13//TGFBI//S100A11//WNT11//RIPK2//CCND2//PEMT//B4GALT1//LARS//BRCA1//CRB2//DKK3//INHBB//IGF2BP1//NKD2//DCBLD2//NDRG3//HIRA//RFWD3//HSP90AB1//BRCA2//TRAF2//APLN//ADGRF5//ASPM//VSNL1//RHBDF2//WISP1//FGF19//BICC1//NRG2//ADGRG3//LY6G6D//LRCH1
GO:0048513	animal organ development	Biological process	43	3428	128	17653	1.72996	0.000103509	0.0411063	3.98502	0.335938	INHBB//SHH//NOTCH1//WNT11//FAM83D//PDX1//SRD5A1//HSP90AB1//PPARG//TGFBI//NHS//ESCO2//ANLN//NME1//MSX1//COL9A1//NCOA6//BRCA2//ZIC1//ROGDI//BICC1//APLN//ASPM//CRB2//FJX1//IGF2BP1//ADGRG3//FLVCR1//RPS14//IBSP//TFRC//DKK3//TESC//B4GALT1//CCNA2//CDH3//RIPK2//WDR5//TTC9//PLS3//RPTN//CLDN1//NRG2
GO:0006996	organelle organization	Biological process	47	3888	128	17653	1.66717	0.000104939	0.0411063	3.97906	0.367188	RPS14//BRCA2//MAD2L1//NUSAP1//HIRA//ANLN//CAMSAP1//DNA2//CHAF1A//HIST1H2BL//PLS3//MAP3K20//C2CD4A//HELLS//HSP90AB1//NRF1//CKAP2//TMED4//ASPM//CEP72//CENPN//NCAPG//KIF20B//TRIP13//BRCA1//WDR5//POC1B//NOTCH1//CCNA2//GRPEL2//DNAJC15//RASA1//C15ORF62//RAP1GDS1//S100A9//RFC3//GINS1//YEATS2//SHH//NKD2//WNT11//TPX2//MSX1//CASS4//SREBF2//PEMT//SELENOI
GO:0042733	embryonic digit morphogenesis	Biological process	5	65	128	17653	10.6088	0.000108047	0.0411063	3.96639	0.0390625	MSX1//NOTCH1//FLVCR1//MAP3K20//SHH
GO:0071840	cellular component organization or biogenesis	Biological process	68	6486	128	17653	1.44591	0.000109406	0.0411063	3.96096	0.53125	RPS14//BRCA2//MAD2L1//NUSAP1//HIRA//ANLN//CAMSAP1//DNA2//CDH3//MSX1//WISP1//CHAF1A//HIST1H2BL//PLS3//MAP3K20//C2CD4A//HELLS//HSP90AB1//NRF1//CKAP2//TMED4//ASPM//CEP72//CENPN//NCAPG//KIF20B//TRIP13//BRCA1//NOTCH1//SHH//ATP10A//RASA1//C15ORF62//LARS//WDR5//POC1B//NME1//S100A9//CCNA2//GRPEL2//DNAJC15//COL9A1//VCAN//B4GALT1//IBSP//ITGA9//TGFBI//DCBLD2//PPARG//NDRG3//WNT11//RAP1GDS1//RFC3//GINS1//TRAF…
GO:0033365	protein localization to organelle	Biological process	17	842	128	17653	2.78449	0.000123642	0.0440099	3.90784	0.132812	RPS14//LARS//GRPEL2//DNAJC15//HSP90AB1//MSX1//SHH//KIF20B//ZIC1//BRCA2//ESCO2//FAM83D//PEMT//SREBF2//SELENOI//ANLN//CEP72
GO:0048522	positive regulation of cellular process	Biological process	57	5142	128	17653	1.5288	0.000146752	0.049624	3.83342	0.445312	MAP3K20//RIPK2//CCND2//FGF19//ASPM//NOTCH1//SHH//PPARG//S100A9//TRAF2//PDX1//ROGDI//KIF20B//CRB2//CDH3//INHBB//NKD2//NME1//NCOA6//TESC//BRCA1//BRCA2//WNT11//ZIC1//CCNA2//HSP90AB1//MSX1//C15ORF62//SLC39A10//TFRC//TPX2//TAS2R13//ELOC//VSNL1//WDR5//APLN//MCF2L//TMED4//DNA2//NUSAP1//DDN//CKAP2//NRF1//SREBF2//PEMT//NRG2//B4GALT1//ADGRF5//MAD2L1//OLFM4//RFC3//FAM83D//CLDN1//SELENOI//ANLN//LARS//CIP2A
GO:0051050	positive regulation of transport	Biological process	18	947	128	17653	2.62139	0.000164	0.0528158	3.78516	0.140625	S100A9//FGF19//INHBB//TESC//HSP90AB1//PDX1//VSNL1//SHH//ZIC1//RIPK2//APLN//PPARG//SLC35D3//KIF20B//CDH3//PEMT//SREBF2//SELENOI
GO:0035690	cellular response to drug	Biological process	10	340	128	17653	4.0563	0.000187134	0.0575268	3.72785	0.078125	RIPK2//CCNA2//MSX1//SRD5A1//BRCA1//TRAF2//LY6G6D//HSP90AB1//NME1//TFRC
GO:0000280	nuclear division	Biological process	11	411	128	17653	3.69113	0.000202403	0.0595154	3.69378	0.0859375	MAD2L1//NUSAP1//HIRA//NCAPG//KIF20B//TRIP13//ANLN//BRCA2//ASPM//TPX2//MSX1
GO:0000278	mitotic cell cycle	Biological process	19	1056	128	17653	2.48141	0.000215399	0.0601939	3.66676	0.148438	MAD2L1//NUSAP1//HIRA//CEP72//CCNA2//CKAP2//ANLN//RASA1//BRCA2//NCAPG//KIF20B//MAP3K20//TRIP13//TPX2//RFWD3//BRCA1//CCND2//GINS1//DNA2
GO:0051716	cellular response to stimulus	Biological process	75	7556	128	17653	1.36892	0.000222512	0.0601939	3.65265	0.585938	MAP3K20//RASA1//RIPK2//NRG2//FGF19//DUSP4//RFWD3//BRCA1//BRCA2//DNA2//RFC3//S100A9//NOTCH1//WNT11//DKK3//NKD2//WISP1//TMED4//LRCH1//LRRIQ4//NTS//PPARG//NDRG3//S100A11//TRAF2//APLN//CASS4//MCF2L//GNB1L//WSB2//CHAF1A//NCOA6//EEPD1//ESCO2//TRIP13//HSP90AB1//ADGRG4//ADGRF5//ADGRG3//IL17C//TAS2R13//SHH//ITGA9//PDX1//CHML//RAP1GDS1//CCNA2//C15ORF62//ZIC1//INHBB//SRD5A1//SREBF2//IGF2BP1//LARS//MSX1//CRB…
GO:0000910	cytokinesis	Biological process	7	172	128	17653	5.61278	0.000259386	0.0674703	3.58605	0.0546875	CKAP2//NUSAP1//ANLN//RASA1//BRCA2//TAS2R13//KIF20B
GO:0071103	DNA conformation change	Biological process	9	292	128	17653	4.25078	0.000280275	0.0676878	3.55242	0.0703125	CHAF1A//HIST1H2BL//HIRA//NUSAP1//NCAPG//HELLS//DNA2//GINS1//CENPN
GO:0051222	positive regulation of protein transport	Biological process	11	427	128	17653	3.55282	0.000280877	0.0676878	3.55148	0.0859375	HSP90AB1//PDX1//VSNL1//SHH//ZIC1//RIPK2//SLC35D3//KIF20B//PEMT//SREBF2//SELENOI
GO:0035270	endocrine system development	Biological process	6	125	128	17653	6.61988	0.00029966	0.0676878	3.52337	0.046875	PDX1//MSX1//SRD5A1//DKK3//WNT11//SHH
GO:0071705	nitrogen compound transport	Biological process	31	2264	128	17653	1.8884	0.000301404	0.0676878	3.52085	0.242188	S100A9//RPS14//LARS//CHML//TMED4//DNAJC15//TESC//RHBDF2//SLC44A5//SLC19A2//FLVCR1//TCN1//PDX1//GRPEL2//HSP90AB1//TFRC//VSNL1//SHH//ZIC1//PPARG//INHBB//RIPK2//TRAF2//IGF2BP1//APLN//SLC35D3//NOTCH1//KIF20B//PEMT//SREBF2//SELENOI
GO:0008284	positive regulation of cell proliferation	Biological process	17	911	128	17653	2.57359	0.000313344	0.0676878	3.50398	0.132812	ASPM//NOTCH1//SHH//CDH3//SLC39A10//TFRC//RIPK2//CCNA2//NME1//B4GALT1//APLN//CIP2A//PDX1//ROGDI//CCND2//KIF20B//FGF19
GO:0048598	embryonic morphogenesis	Biological process	13	586	128	17653	3.05953	0.000335453	0.0676878	3.47437	0.101562	DUSP4//CRB2//KIF20B//NOTCH1//SHH//HIRA//APLN//PDX1//MSX1//ZIC1//FLVCR1//MAP3K20//WNT11
GO:2000179	positive regulation of neural precursor cell proliferation	Biological process	4	46	128	17653	11.9925	0.000339972	0.0676878	3.46856	0.03125	ASPM//NOTCH1//SHH//CIP2A
GO:0042127	regulation of cell proliferation	Biological process	25	1668	128	17653	2.06706	0.000349675	0.0676878	3.45634	0.195312	ASPM//NOTCH1//SHH//PDX1//ROGDI//CCND2//KIF20B//FGF19//PEMT//B4GALT1//MSX1//NME1//TESC//S100A11//CDH3//SLC39A10//TFRC//RIPK2//BRCA2//CCNA2//PPARG//WNT11//APLN//CIP2A//BRCA1
GO:0010564	regulation of cell cycle process	Biological process	15	750	128	17653	2.75828	0.000351419	0.0676878	3.45418	0.117188	KIF20B//MAD2L1//TRIP13//ANLN//TPX2//CEP72//RFWD3//BRCA2//TAS2R13//BRCA1//NUSAP1//HSP90AB1//MSX1//CCND2//FAM83D
GO:0051726	regulation of cell cycle	Biological process	20	1197	128	17653	2.30433	0.00038193	0.0676878	3.41802	0.15625	DNA2//MAP3K20//NOTCH1//KIF20B//MAD2L1//TRIP13//ANLN//TPX2//CEP72//RFWD3//BRCA2//TAS2R13//BRCA1//CCND2//NUSAP1//ASPM//HSP90AB1//MSX1//FAM83D//CCNA2
GO:0002052	positive regulation of neuroblast proliferation	Biological process	3	20	128	17653	20.6871	0.00038787	0.0676878	3.41131	0.0234375	ASPM//NOTCH1//SHH
GO:0006271	DNA strand elongation involved in DNA replication	Biological process	3	20	128	17653	20.6871	0.00038787	0.0676878	3.41131	0.0234375	DNA2//GINS1//RFC3
GO:0030097	hemopoiesis	Biological process	16	842	128	17653	2.62069	0.000390334	0.0676878	3.40856	0.125	ESCO2//ANLN//SHH//NME1//NCOA6//ADGRG3//FLVCR1//RPS14//PPARG//TFRC//TESC//RIPK2//WDR5//NOTCH1//BRCA2//ROGDI
GO:0045787	positive regulation of cell cycle	Biological process	10	377	128	17653	3.6582	0.000425455	0.0716008	3.37115	0.078125	TAS2R13//KIF20B//CCND2//NUSAP1//BRCA2//HSP90AB1//BRCA1//MAD2L1//MSX1//FAM83D
GO:0044380	protein localization to cytoskeleton	Biological process	4	49	128	17653	11.2583	0.000434073	0.0716008	3.36244	0.03125	KIF20B//FAM83D//ANLN//CEP72
GO:0051223	regulation of protein transport	Biological process	14	688	128	17653	2.80639	0.000470303	0.0746007	3.32762	0.109375	HSP90AB1//PDX1//VSNL1//SHH//ZIC1//INHBB//RHBDF2//RIPK2//TRAF2//SLC35D3//KIF20B//PEMT//SREBF2//SELENOI
GO:0048285	organelle fission	Biological process	11	457	128	17653	3.31959	0.000497981	0.0746007	3.30279	0.0859375	MAD2L1//NUSAP1//HIRA//NCAPG//KIF20B//TRIP13//ANLN//BRCA2//ASPM//TPX2//MSX1
GO:0033260	nuclear DNA replication	Biological process	4	51	128	17653	10.8168	0.000506285	0.0746007	3.29561	0.03125	DNA2//RFC3//GINS1//BRCA2
GO:0009966	regulation of signal transduction	Biological process	39	3215	128	17653	1.67299	0.000508512	0.0746007	3.2937	0.304688	MAP3K20//RIPK2//DUSP4//TRAF2//ZIC1//IL17C//INHBB//NTS//SHH//APLN//NRG2//FGF19//DKK3//NKD2//HSP90AB1//CRB2//MSX1//NOTCH1//FAM83D//BRCA1//MCF2L//RHBDF2//TMED4//CDH3//MAGEA1//RASA1//SLC39A10//PPARG//WNT11//BICC1//ASPM//ADGRG3//DNA2//TPX2//RFC3//PDX1//LARS//LY6G6D//S100A9
GO:0031328	positive regulation of cellular biosynthetic process	Biological process	26	1812	128	17653	1.9789	0.000511601	0.0746007	3.29107	0.203125	NOTCH1//NCOA6//PPARG//TESC//SHH//BRCA1//BRCA2//WNT11//ZIC1//CCNA2//ELOC//WDR5//HSP90AB1//DNA2//DDN//CKAP2//PDX1//MSX1//NRF1//SREBF2//RIPK2//CDH3//PEMT//ADGRF5//RFC3//APLN
GO:0097150	neuronal stem cell population maintenance	Biological process	3	22	128	17653	18.8065	0.000518444	0.0746007	3.2853	0.0234375	IGF2BP1//ASPM//NOTCH1
GO:1904951	positive regulation of establishment of protein localization	Biological process	11	462	128	17653	3.28367	0.00054518	0.07574	3.26346	0.0859375	HSP90AB1//PDX1//VSNL1//SHH//ZIC1//RIPK2//SLC35D3//KIF20B//PEMT//SREBF2//SELENOI
GO:2000241	regulation of reproductive process	Biological process	6	140	128	17653	5.9106	0.000548759	0.07574	3.26062	0.046875	ASPM//B4GALT1//INHBB//SHH//NOTCH1//MSX1
GO:0042493	response to drug	Biological process	17	966	128	17653	2.42706	0.000611656	0.0827325	3.21349	0.132812	SLC19A2//TCN1//PPARG//NOTCH1//HSP90AB1//NME1//TFRC//PEMT//CLDN1//RIPK2//CCNA2//MSX1//SRD5A1//BRCA1//TRAF2//LY6G6D//CDH3
GO:0033157	regulation of intracellular protein transport	Biological process	8	261	128	17653	4.22725	0.000636836	0.083035	3.19597	0.0625	HSP90AB1//SHH//ZIC1//SLC35D3//KIF20B//PEMT//SREBF2//SELENOI
GO:0048534	hematopoietic or lymphoid organ development	Biological process	16	882	128	17653	2.50184	0.000646383	0.083035	3.18951	0.125	ESCO2//ANLN//SHH//NME1//BRCA2//ROGDI//NCOA6//ADGRG3//FLVCR1//RPS14//PPARG//TFRC//TESC//RIPK2//WDR5//NOTCH1
GO:0009891	positive regulation of biosynthetic process	Biological process	26	1841	128	17653	1.94773	0.000650725	0.083035	3.1866	0.203125	NOTCH1//NCOA6//PPARG//TESC//SHH//BRCA1//BRCA2//WNT11//ZIC1//CCNA2//ELOC//WDR5//HSP90AB1//DNA2//DDN//CKAP2//PDX1//MSX1//NRF1//SREBF2//RIPK2//CDH3//PEMT//ADGRF5//RFC3//APLN
GO:0048519	negative regulation of biological process	Biological process	56	5303	128	17653	1.45638	0.000680755	0.0852583	3.16701	0.4375	DNA2//MAP3K20//PDX1//MAGEA1//MSX1//NOTCH1//PPARG//YEATS2//RPS14//SHH//SREBF2//DUSP4//RASA1//NME1//SLC39A10//HELLS//TESC//CAMSAP1//CKAP2//KIF20B//MAD2L1//TRIP13//TGFBI//S100A11//WNT11//RIPK2//CCND2//PEMT//B4GALT1//LARS//IGF2BP1//APLN//FGF19//BRCA1//CRB2//LRCH1//DKK3//INHBB//NKD2//DCBLD2//NDRG3//HIRA//RFWD3//HSP90AB1//ADGRG3//CDH3//BRCA2//TRAF2//ADGRF5//ASPM//VSNL1//RHBDF2//WISP1//BICC1//NRG2//LY6G…
GO:0022610	biological adhesion	Biological process	21	1360	128	17653	2.12956	0.000760164	0.0910188	3.11909	0.164062	CRB2//RASA1//CDH3//OLFM4//VCAN//B4GALT1//IBSP//ITGA9//CASS4//TGFBI//WISP1//NOTCH1//CLDN1//HSP90AB1//SHH//RIPK2//TESC//TFRC//INHBB//S100A9//S100A11
GO:0048856	anatomical structure development	Biological process	60	5836	128	17653	1.4179	0.000774398	0.0910188	3.11104	0.46875	CDH3//MSX1//WDR5//VCAN//TGFBI//APLN//INHBB//BRCA2//TRIP13//FLVCR1//SHH//RASA1//SRD5A1//NOTCH1//DUSP4//CRB2//ASPM//GINS1//WNT11//FAM83D//KIF20B//PDX1//HSP90AB1//PPARG//B4GALT1//NHS//ESCO2//ANLN//NME1//HELLS//NRF1//DKK3//HIRA//BICC1//ZIC1//COL9A1//FGF19//NCOA6//ROGDI//CLDN1//ATP10A//C15ORF62//RPTN//FJX1//S100A9//IGF2BP1//CAMSAP1//ADGRG3//RPS14//IBSP//TFRC//TESC//CCNA2//MAP3K20//BRCA1//RIPK2//NRG2//…
GO:0140014	mitotic nuclear division	Biological process	8	269	128	17653	4.10153	0.000775306	0.0910188	3.11053	0.0625	MAD2L1//NUSAP1//HIRA//NCAPG//KIF20B//TRIP13//ANLN//TPX2
GO:0048518	positive regulation of biological process	Biological process	60	5841	128	17653	1.41668	0.000793334	0.0910188	3.10054	0.46875	MAP3K20//RIPK2//CCND2//FGF19//ASPM//NOTCH1//SHH//S100A9//TRAF2//PPARG//PDX1//ROGDI//KIF20B//BRCA1//CDH3//TESC//WNT11//CRB2//INHBB//SREBF2//NKD2//NME1//NCOA6//BRCA2//ZIC1//CCNA2//HSP90AB1//MSX1//C15ORF62//SLC39A10//TFRC//APLN//TPX2//TAS2R13//ELOC//VSNL1//WDR5//MCF2L//TMED4//DNA2//IBSP//NUSAP1//DDN//CKAP2//NRF1//PEMT//NRG2//B4GALT1//SLC35D3//IGF2BP1//ADGRF5//MAD2L1//OLFM4//RFC3//FAM83D//CLDN1//SELE…
GO:0006323	DNA packaging	Biological process	7	208	128	17653	4.64134	0.000809065	0.0910188	3.09202	0.0546875	CHAF1A//HIST1H2BL//HIRA//NUSAP1//NCAPG//HELLS//CENPN
GO:0042886	amide transport	Biological process	27	1972	128	17653	1.88828	0.000810543	0.0910188	3.09122	0.210938	S100A9//RPS14//LARS//CHML//TMED4//DNAJC15//TESC//RHBDF2//SLC19A2//PDX1//GRPEL2//HSP90AB1//TFRC//VSNL1//SHH//ZIC1//PPARG//INHBB//RIPK2//TRAF2//APLN//SLC35D3//NOTCH1//KIF20B//PEMT//SREBF2//SELENOI
GO:0070201	regulation of establishment of protein localization	Biological process	14	731	128	17653	2.64131	0.000851412	0.0910188	3.06986	0.109375	HSP90AB1//PDX1//VSNL1//SHH//ZIC1//INHBB//RHBDF2//RIPK2//TRAF2//SLC35D3//KIF20B//PEMT//SREBF2//SELENOI
GO:0000732	strand displacement	Biological process	3	26	128	17653	15.9132	0.000856963	0.0910188	3.06704	0.0234375	DNA2//BRCA1//BRCA2
GO:0007275	multicellular organism development	Biological process	56	5351	128	17653	1.44332	0.000865109	0.0910188	3.06293	0.4375	WDR5//VCAN//TGFBI//APLN//INHBB//FLVCR1//SHH//RASA1//SRD5A1//MSX1//NOTCH1//DUSP4//CRB2//ASPM//BRCA2//GINS1//WNT11//FAM83D//KIF20B//PDX1//HSP90AB1//PPARG//NHS//ESCO2//ANLN//NME1//BICC1//HIRA//ZIC1//COL9A1//FGF19//NCOA6//ROGDI//CLDN1//FJX1//S100A9//IGF2BP1//ADGRG3//RPS14//IBSP//TFRC//DKK3//TESC//B4GALT1//CCNA2//CAMSAP1//CDH3//MAP3K20//BRCA1//RIPK2//NRG2//TTC9//PLS3//RPTN//HELLS//NRF1
GO:0090100	positive regulation of transmembrane receptor protein serine/threonine kinase signaling pathway	Biological process	5	102	128	17653	6.76049	0.000880184	0.0910188	3.05543	0.0390625	INHBB//HSP90AB1//CRB2//MSX1//NOTCH1
GO:0090068	positive regulation of cell cycle process	Biological process	8	277	128	17653	3.98308	0.000937067	0.0910188	3.02823	0.0625	TAS2R13//KIF20B//NUSAP1//BRCA1//MAD2L1//MSX1//CCND2//FAM83D
GO:0043966	histone H3 acetylation	Biological process	4	60	128	17653	9.19427	0.000939537	0.0910188	3.02709	0.03125	BRCA1//WDR5//YEATS2//BRCA2
GO:0044786	cell cycle DNA replication	Biological process	4	60	128	17653	9.19427	0.000939537	0.0910188	3.02709	0.03125	DNA2//RFC3//GINS1//BRCA2
GO:0050896	response to stimulus	Biological process	84	9123	128	17653	1.26984	0.000948264	0.0910188	3.02307	0.65625	MAP3K20//RASA1//RIPK2//NRG2//FGF19//DUSP4//RFWD3//BRCA1//BRCA2//DNA2//RFC3//TAS2R13//S100A9//NOTCH1//B4GALT1//PPARG//TRAF2//WNT11//HSP90AB1//INHBB//SAA2//SHH//DKK3//NKD2//WISP1//TMED4//LRCH1//LRRIQ4//NTS//NDRG3//S100A11//APLN//CASS4//MCF2L//GNB1L//WSB2//CHAF1A//NCOA6//EEPD1//ESCO2//TRIP13//IL17C//ADGRG4//ADGRF5//ADGRG3//ITGA9//PDX1//CHML//RAP1GDS1//CCNA2//C15ORF62//ZIC1//SRD5A1//SREBF2//CDH3//ME1…
GO:0022616	DNA strand elongation	Biological process	3	27	128	17653	15.3238	0.000959	0.0910188	3.01818	0.0234375	RFC3//GINS1//DNA2
GO:1902692	regulation of neuroblast proliferation	Biological process	3	27	128	17653	15.3238	0.000959	0.0910188	3.01818	0.0234375	ASPM//NOTCH1//SHH
GO:0006259	DNA metabolic process	Biological process	17	1006	128	17653	2.33056	0.000959898	0.0910188	3.01777	0.132812	CHAF1A//DNA2//NCOA6//RFC3//BRCA1//BRCA2//RFWD3//GINS1//ESCO2//EEPD1//TRIP13//HELLS//HSP90AB1//S100A11//TFRC//PPARG//NME1
GO:1903829	positive regulation of cellular protein localization	Biological process	9	347	128	17653	3.57702	0.000969001	0.0910188	3.01368	0.0703125	HSP90AB1//SHH//ZIC1//SLC35D3//KIF20B//NKD2//PEMT//SREBF2//SELENOI
GO:0071634	regulation of transforming growth factor beta production	Biological process	3	28	128	17653	14.7765	0.00106842	0.0989824	2.97126	0.0234375	CDH3//WNT11//HSP90AB1
GO:0002520	immune system development	Biological process	16	928	128	17653	2.37783	0.00110772	0.101236	2.95557	0.125	ESCO2//ANLN//SHH//NME1//BRCA2//ROGDI//NCOA6//ADGRG3//FLVCR1//RPS14//PPARG//TFRC//TESC//RIPK2//WDR5//NOTCH1
GO:0071702	organic substance transport	Biological process	33	2667	128	17653	1.70647	0.0011386	0.102671	2.94363	0.257812	S100A9//RPS14//LARS//CHML//TMED4//DNAJC15//TESC//RHBDF2//SLC44A5//SLC19A2//FLVCR1//TCN1//PPARG//FGF19//PDX1//GRPEL2//HSP90AB1//TFRC//SLC35D3//VSNL1//SHH//ZIC1//ATP10A//INHBB//RIPK2//TRAF2//IGF2BP1//APLN//SREBF2//NOTCH1//KIF20B//PEMT//SELENOI
GO:0034698	response to gonadotropin	Biological process	3	29	128	17653	14.267	0.00118542	0.102782	2.92613	0.0234375	SRD5A1//NOTCH1//CCNA2
GO:0035116	embryonic hindlimb morphogenesis	Biological process	3	29	128	17653	14.267	0.00118542	0.102782	2.92613	0.0234375	MSX1//NOTCH1//SHH
GO:0071604	transforming growth factor beta production	Biological process	3	29	128	17653	14.267	0.00118542	0.102782	2.92613	0.0234375	CDH3//WNT11//HSP90AB1
GO:0007059	chromosome segregation	Biological process	9	358	128	17653	3.46711	0.00120466	0.103128	2.91913	0.0703125	MAD2L1//NUSAP1//HIRA//CENPN//NCAPG//TRIP13//FAM83D//ESCO2//BRCA1
GO:0090092	regulation of transmembrane receptor protein serine/threonine kinase signaling pathway	Biological process	7	225	128	17653	4.29066	0.00127738	0.107986	2.89368	0.0546875	INHBB//DKK3//HSP90AB1//CRB2//MSX1//NOTCH1//SHH
GO:0046890	regulation of lipid biosynthetic process	Biological process	6	167	128	17653	4.955	0.0013735	0.114679	2.86217	0.046875	DKK3//SCD//SREBF2//BRCA1//FGF19//ADGRF5
GO:0019216	regulation of lipid metabolic process	Biological process	9	366	128	17653	3.39133	0.00140361	0.115763	2.85276	0.0703125	DKK3//SCD//SREBF2//BRCA1//PPARG//FGF19//ADGRF5//NCOA6//ME1
GO:0042307	positive regulation of protein import into nucleus	Biological process	3	31	128	17653	13.3465	0.00144293	0.117573	2.84075	0.0234375	HSP90AB1//SHH//ZIC1
GO:0032880	regulation of protein localization	Biological process	16	956	128	17653	2.30819	0.00150724	0.120091	2.82182	0.125	HSP90AB1//PDX1//VSNL1//SHH//ZIC1//INHBB//RHBDF2//RIPK2//TRAF2//SLC35D3//KIF20B//NKD2//PEMT//SREBF2//SELENOI//CEP72
GO:0045935	positive regulation of nucleobase-containing compound metabolic process	Biological process	24	1742	128	17653	1.90008	0.0015266	0.120091	2.81628	0.1875	NOTCH1//NCOA6//PPARG//TESC//SHH//BRCA1//BRCA2//WNT11//ZIC1//CCNA2//ELOC//WDR5//DNA2//TFRC//DDN//CKAP2//PDX1//MSX1//NRF1//SREBF2//RIPK2//HSP90AB1//RFC3//APLN
GO:0015833	peptide transport	Biological process	26	1951	128	17653	1.83791	0.0015271	0.120091	2.81613	0.203125	S100A9//RPS14//LARS//CHML//TMED4//DNAJC15//TESC//RHBDF2//PDX1//GRPEL2//HSP90AB1//TFRC//VSNL1//SHH//ZIC1//PPARG//INHBB//RIPK2//TRAF2//APLN//SLC35D3//NOTCH1//KIF20B//PEMT//SREBF2//SELENOI
GO:0009790	embryo development	Biological process	16	959	128	17653	2.30096	0.00155649	0.120995	2.80785	0.125	FLVCR1//MSX1//NOTCH1//DUSP4//CRB2//BRCA2//GINS1//KIF20B//SHH//HIRA//APLN//PDX1//ZIC1//MAP3K20//BRCA1//WNT11
GO:0010646	regulation of cell communication	Biological process	40	3522	128	17653	1.56632	0.00158419	0.121309	2.80019	0.3125	MAP3K20//RIPK2//DUSP4//TRAF2//ZIC1//IL17C//INHBB//NTS//SHH//APLN//NRG2//FGF19//DKK3//NKD2//HSP90AB1//CRB2//MSX1//NOTCH1//FAM83D//BRCA1//MCF2L//PDX1//VSNL1//RHBDF2//TMED4//CDH3//MAGEA1//RASA1//SLC39A10//PPARG//WNT11//BICC1//ASPM//ADGRG3//DNA2//TPX2//RFC3//LARS//LY6G6D//S100A9
GO:0090090	negative regulation of canonical Wnt signaling pathway	Biological process	6	172	128	17653	4.81096	0.0015964	0.121309	2.79686	0.046875	DKK3//NOTCH1//SHH//WNT11//BICC1//NKD2
GO:0033554	cellular response to stress	Biological process	26	1962	128	17653	1.82761	0.00165495	0.124361	2.78121	0.203125	MAP3K20//RFWD3//BRCA1//BRCA2//DNA2//RFC3//CHAF1A//NCOA6//EEPD1//ESCO2//TRIP13//RIPK2//INHBB//SRD5A1//SREBF2//IGF2BP1//LARS//TRAF2//MSX1//FGF19//ELOC//NOTCH1//PPARG//CCNA2//HSP90AB1//PDX1
GO:0072594	establishment of protein localization to organelle	Biological process	11	531	128	17653	2.85698	0.00168214	0.124686	2.77414	0.0859375	RPS14//LARS//GRPEL2//DNAJC15//HSP90AB1//SHH//ZIC1//BRCA2//PEMT//SREBF2//SELENOI
GO:0032502	developmental process	Biological process	62	6267	128	17653	1.3644	0.001721	0.124686	2.76422	0.484375	CDH3//MSX1//WDR5//VCAN//TGFBI//APLN//INHBB//BRCA2//TRIP13//FLVCR1//SHH//RASA1//IBSP//HIRA//WNT11//SRD5A1//NOTCH1//DUSP4//CRB2//ASPM//GINS1//FAM83D//KIF20B//PDX1//HSP90AB1//PPARG//B4GALT1//NHS//ESCO2//ANLN//NME1//HELLS//NRF1//DKK3//BICC1//ZIC1//COL9A1//FGF19//NCOA6//ROGDI//CLDN1//ATP10A//C15ORF62//RPTN//FJX1//S100A9//IGF2BP1//CAMSAP1//MAP3K20//TESC//NDRG3//ADGRG3//RPS14//TFRC//CCNA2//BRCA1//ADGRF5…
GO:0031325	positive regulation of cellular metabolic process	Biological process	36	3074	128	17653	1.61513	0.00173259	0.124686	2.7613	0.28125	MAP3K20//RIPK2//CCND2//FGF19//PPARG//S100A9//TRAF2//NOTCH1//INHBB//NKD2//NCOA6//TESC//SHH//BRCA1//BRCA2//WNT11//ZIC1//CCNA2//TPX2//HSP90AB1//ELOC//WDR5//APLN//DNA2//TFRC//DDN//CKAP2//PDX1//MSX1//NRF1//SREBF2//CDH3//PEMT//ADGRF5//RFC3//SLC39A10
GO:0030513	positive regulation of BMP signaling pathway	Biological process	3	33	128	17653	12.5376	0.00173303	0.124686	2.76119	0.0234375	CRB2//MSX1//NOTCH1
GO:0008104	protein localization	Biological process	32	2628	128	17653	1.67932	0.00180392	0.12842	2.74378	0.25	RPS14//LARS//CHML//TMED4//DNAJC15//TESC//RHBDF2//PDX1//GRPEL2//HSP90AB1//CEP72//TFRC//WNT11//MSX1//SHH//KIF20B//VSNL1//ZIC1//PPARG//INHBB//RIPK2//TRAF2//BRCA2//SLC35D3//ESCO2//NOTCH1//NKD2//FAM83D//PEMT//SREBF2//SELENOI//ANLN
GO:0048731	system development	Biological process	50	4760	128	17653	1.44868	0.00186661	0.130481	2.72895	0.390625	WDR5//VCAN//TGFBI//APLN//INHBB//FLVCR1//SHH//RASA1//SRD5A1//ASPM//NOTCH1//WNT11//FAM83D//KIF20B//PDX1//HSP90AB1//PPARG//NHS//ESCO2//ANLN//NME1//MSX1//COL9A1//FGF19//NCOA6//BRCA2//ZIC1//ROGDI//BICC1//CLDN1//CRB2//FJX1//S100A9//IGF2BP1//ADGRG3//RPS14//IBSP//TFRC//DKK3//TESC//B4GALT1//CCNA2//CAMSAP1//CDH3//RIPK2//BRCA1//NRG2//TTC9//PLS3//RPTN
GO:0006275	regulation of DNA replication	Biological process	5	121	128	17653	5.69893	0.00188355	0.130481	2.72502	0.0390625	S100A11//DNA2//BRCA2//RFC3//ESCO2
GO:1904591	positive regulation of protein import	Biological process	3	34	128	17653	12.1689	0.00189074	0.130481	2.72337	0.0234375	HSP90AB1//SHH//ZIC1
GO:0048713	regulation of oligodendrocyte differentiation	Biological process	3	35	128	17653	11.8212	0.00205713	0.139123	2.68674	0.0234375	PPARG//SHH//NOTCH1
GO:2000648	positive regulation of stem cell proliferation	Biological process	3	35	128	17653	11.8212	0.00205713	0.139123	2.68674	0.0234375	ASPM//NOTCH1//SHH
GO:0010604	positive regulation of macromolecule metabolic process	Biological process	36	3106	128	17653	1.59849	0.00208344	0.139508	2.68122	0.28125	MAP3K20//RIPK2//CCND2//FGF19//PPARG//S100A9//TRAF2//NOTCH1//CDH3//TESC//BRCA1//WNT11//INHBB//NKD2//NCOA6//SHH//BRCA2//ZIC1//CCNA2//TPX2//HSP90AB1//ELOC//WDR5//DNA2//TFRC//DDN//CKAP2//PDX1//MSX1//NRF1//SREBF2//PEMT//IGF2BP1//RFC3//APLN//SLC39A10
GO:0023051	regulation of signaling	Biological process	40	3575	128	17653	1.54309	0.00211329	0.140119	2.67504	0.3125	MAP3K20//RIPK2//DUSP4//TRAF2//ZIC1//IL17C//INHBB//NTS//SHH//APLN//NRG2//FGF19//DKK3//NKD2//HSP90AB1//CRB2//MSX1//NOTCH1//FAM83D//BRCA1//MCF2L//PDX1//VSNL1//RHBDF2//TMED4//CDH3//MAGEA1//RASA1//SLC39A10//PPARG//WNT11//BICC1//ASPM//ADGRG3//DNA2//TPX2//RFC3//LARS//LY6G6D//S100A9
GO:0000731	DNA synthesis involved in DNA repair	Biological process	4	75	128	17653	7.35542	0.00215426	0.141449	2.6667	0.03125	RFC3//DNA2//BRCA1//BRCA2
GO:0060070	canonical Wnt signaling pathway	Biological process	8	317	128	17653	3.48048	0.00219745	0.14151	2.65808	0.0625	CDH3//DKK3//NOTCH1//SHH//WNT11//BICC1//NKD2//ASPM
GO:0051783	regulation of nuclear division	Biological process	6	184	128	17653	4.4972	0.00224339	0.14151	2.64909	0.046875	KIF20B//MAD2L1//TRIP13//ANLN//NUSAP1//MSX1
GO:0007440	foregut morphogenesis	Biological process	2	10	128	17653	27.5828	0.00225981	0.14151	2.64593	0.015625	SHH//NOTCH1
GO:0060768	regulation of epithelial cell proliferation involved in prostate gland development	Biological process	2	10	128	17653	27.5828	0.00225981	0.14151	2.64593	0.015625	SHH//NOTCH1
GO:1902969	mitotic DNA replication	Biological process	2	10	128	17653	27.5828	0.00225981	0.14151	2.64593	0.015625	GINS1//BRCA2
GO:0032386	regulation of intracellular transport	Biological process	9	395	128	17653	3.14235	0.0023578	0.144306	2.62749	0.0703125	HSP90AB1//SHH//ZIC1//SLC35D3//KIF20B//CDH3//PEMT//SREBF2//SELENOI
GO:0031100	animal organ regeneration	Biological process	4	77	128	17653	7.16437	0.00237204	0.144306	2.62488	0.03125	CLDN1//NOTCH1//PPARG//CCNA2
GO:2000177	regulation of neural precursor cell proliferation	Biological process	4	77	128	17653	7.16437	0.00237204	0.144306	2.62488	0.03125	ASPM//NOTCH1//SHH//CIP2A
GO:0010557	positive regulation of macromolecule biosynthetic process	Biological process	23	1698	128	17653	1.86809	0.00241213	0.144306	2.6176	0.179688	NOTCH1//NCOA6//PPARG//TESC//SHH//BRCA1//BRCA2//WNT11//ZIC1//CCNA2//ELOC//WDR5//DNA2//DDN//CKAP2//PDX1//MSX1//NRF1//SREBF2//RIPK2//HSP90AB1//RFC3//APLN
GO:0035137	hindlimb morphogenesis	Biological process	3	37	128	17653	11.1822	0.00241654	0.144306	2.61681	0.0234375	MSX1//NOTCH1//SHH
GO:0048869	cellular developmental process	Biological process	46	4323	128	17653	1.46751	0.00243248	0.144306	2.61395	0.359375	CDH3//MSX1//BRCA2//TRIP13//RASA1//SHH//VCAN//IBSP//HIRA//WNT11//NOTCH1//ASPM//FAM83D//TGFBI//B4GALT1//ESCO2//ANLN//NME1//PDX1//CLDN1//ATP10A//C15ORF62//CRB2//PPARG//S100A9//ROGDI//CAMSAP1//NCOA6//INHBB//NHS//MAP3K20//TESC//NDRG3//SRD5A1//ZIC1//ADGRG3//FLVCR1//RPS14//TFRC//WDR5//ADGRF5//HSP90AB1//RIPK2//KIF20B//RPTN//OLFM4
GO:0030326	embryonic limb morphogenesis	Biological process	5	129	128	17653	5.34551	0.00249095	0.145226	2.60364	0.0390625	MSX1//SHH//NOTCH1//FLVCR1//MAP3K20
GO:0035113	embryonic appendage morphogenesis	Biological process	5	129	128	17653	5.34551	0.00249095	0.145226	2.60364	0.0390625	SHH//MSX1//NOTCH1//FLVCR1//MAP3K20
GO:0051052	regulation of DNA metabolic process	Biological process	9	399	128	17653	3.11084	0.00252244	0.145806	2.59818	0.0703125	ESCO2//S100A11//BRCA1//DNA2//TFRC//BRCA2//HSP90AB1//PPARG//RFC3
GO:0008285	negative regulation of cell proliferation	Biological process	13	732	128	17653	2.44929	0.00254496	0.145861	2.59432	0.101562	BRCA2//SHH//PPARG//NOTCH1//WNT11//APLN//PEMT//B4GALT1//PDX1//MSX1//NME1//TESC//S100A11
GO:0045687	positive regulation of glial cell differentiation	Biological process	3	38	128	17653	10.888	0.00260989	0.148325	2.58338	0.0234375	NOTCH1//PPARG//SHH
GO:0048477	oogenesis	Biological process	4	80	128	17653	6.8957	0.00272642	0.149926	2.56441	0.03125	BRCA2//TRIP13//INHBB//ASPM
GO:0001833	inner cell mass cell proliferation	Biological process	2	11	128	17653	25.0753	0.00274891	0.149926	2.56084	0.015625	BRCA2//GINS1
GO:0044650	adhesion of symbiont to host cell	Biological process	2	11	128	17653	25.0753	0.00274891	0.149926	2.56084	0.015625	HSP90AB1//INHBB
GO:0060767	epithelial cell proliferation involved in prostate gland development	Biological process	2	11	128	17653	25.0753	0.00274891	0.149926	2.56084	0.015625	NOTCH1//SHH
GO:0070673	response to interleukin-18	Biological process	2	11	128	17653	25.0753	0.00274891	0.149926	2.56084	0.015625	RIPK2//CLDN1
GO:0050679	positive regulation of epithelial cell proliferation	Biological process	6	192	128	17653	4.30981	0.00277333	0.150048	2.557	0.046875	CDH3//B4GALT1//SHH//APLN//NME1//NOTCH1
GO:0006310	DNA recombination	Biological process	7	261	128	17653	3.69884	0.00295453	0.158583	2.52951	0.0546875	BRCA2//RFWD3//BRCA1//DNA2//TRIP13//TFRC//NCOA6
GO:0050810	regulation of steroid biosynthetic process	Biological process	4	82	128	17653	6.72752	0.00298186	0.15879	2.52551	0.03125	DKK3//SCD//SREBF2//FGF19
GO:0030154	cell differentiation	Biological process	44	4124	128	17653	1.47144	0.0030194	0.159533	2.52008	0.34375	BRCA2//TRIP13//RASA1//SHH//VCAN//IBSP//HIRA//WNT11//NOTCH1//ASPM//FAM83D//TGFBI//B4GALT1//ESCO2//ANLN//NME1//MSX1//PDX1//CLDN1//CRB2//PPARG//S100A9//ROGDI//NCOA6//ADGRG3//FLVCR1//RPS14//TFRC//TESC//WDR5//CAMSAP1//CDH3//ADGRF5//INHBB//HSP90AB1//RIPK2//KIF20B//RPTN//OLFM4//NHS//MAP3K20//NDRG3//SRD5A1//ZIC1
GO:0060828	regulation of canonical Wnt signaling pathway	Biological process	7	263	128	17653	3.67072	0.00308192	0.160442	2.51118	0.0546875	DKK3//NOTCH1//SHH//WNT11//BICC1//NKD2//ASPM
GO:0048871	multicellular organismal homeostasis	Biological process	8	335	128	17653	3.29347	0.00308406	0.160442	2.51088	0.0625	CDH3//POC1B//APLN//ADGRF5//TFRC//RPTN//CLDN1//SLC35D3
GO:0001501	skeletal system development	Biological process	10	493	128	17653	2.79745	0.00316742	0.162069	2.49929	0.078125	TGFBI//FLVCR1//SHH//WNT11//TTC9//PLS3//SRD5A1//MSX1//WDR5//VCAN
GO:0001837	epithelial to mesenchymal transition	Biological process	5	137	128	17653	5.03336	0.00322952	0.162069	2.49086	0.0390625	MSX1//NOTCH1//CRB2//WNT11//FAM83D
GO:0033036	macromolecule localization	Biological process	34	2955	128	17653	1.58683	0.00325613	0.162069	2.4873	0.265625	RPS14//LARS//CHML//TMED4//SREBF2//PPARG//DNAJC15//TESC//RHBDF2//PDX1//GRPEL2//HSP90AB1//CEP72//TFRC//WNT11//MSX1//SHH//KIF20B//VSNL1//ZIC1//ATP10A//INHBB//RIPK2//TRAF2//IGF2BP1//BRCA2//SLC35D3//ESCO2//NOTCH1//NKD2//FAM83D//PEMT//SELENOI//ANLN
GO:0035090	maintenance of apical/basal cell polarity	Biological process	2	12	128	17653	22.9857	0.00328307	0.162069	2.48372	0.015625	CRB2//WNT11
GO:0045199	maintenance of epithelial cell apical/basal polarity	Biological process	2	12	128	17653	22.9857	0.00328307	0.162069	2.48372	0.015625	CRB2//WNT11
GO:0090370	negative regulation of cholesterol efflux	Biological process	2	12	128	17653	22.9857	0.00328307	0.162069	2.48372	0.015625	SHH//SREBF2
GO:2001053	regulation of mesenchymal cell apoptotic process	Biological process	2	12	128	17653	22.9857	0.00328307	0.162069	2.48372	0.015625	SHH//MSX1
GO:0030879	mammary gland development	Biological process	5	138	128	17653	4.99689	0.00333182	0.162108	2.47732	0.0390625	NME1//APLN//BRCA2//B4GALT1//MSX1
GO:0061351	neural precursor cell proliferation	Biological process	5	138	128	17653	4.99689	0.00333182	0.162108	2.47732	0.0390625	ASPM//NOTCH1//SHH//IGF2BP1//CIP2A
GO:0071229	cellular response to acid chemical	Biological process	6	200	128	17653	4.13742	0.00339209	0.162838	2.46953	0.046875	LARS//PPARG//TESC//WNT11//NME1//CLDN1
GO:0061053	somite development	Biological process	4	85	128	17653	6.49007	0.00339496	0.162838	2.46917	0.03125	CRB2//NOTCH1//SHH//WNT11
GO:0051173	positive regulation of nitrogen compound metabolic process	Biological process	34	2965	128	17653	1.58148	0.00344181	0.163922	2.46321	0.265625	MAP3K20//RIPK2//CCND2//FGF19//PPARG//S100A9//TRAF2//NOTCH1//INHBB//NKD2//NCOA6//TESC//SHH//BRCA1//BRCA2//WNT11//ZIC1//CCNA2//TPX2//HSP90AB1//ELOC//WDR5//DNA2//TFRC//DDN//CKAP2//PDX1//MSX1//NRF1//SREBF2//PEMT//RFC3//APLN//SLC39A10
GO:0007346	regulation of mitotic cell cycle	Biological process	12	674	128	17653	2.45544	0.00364362	0.169049	2.43847	0.09375	KIF20B//MAD2L1//MAP3K20//TRIP13//ANLN//TPX2//CEP72//RFWD3//BRCA1//NUSAP1//BRCA2//CCND2
GO:0048762	mesenchymal cell differentiation	Biological process	6	203	128	17653	4.07628	0.0036488	0.169049	2.43785	0.046875	SHH//NOTCH1//WNT11//FAM83D//MSX1//CRB2
GO:0072698	protein localization to microtubule cytoskeleton	Biological process	3	43	128	17653	9.62191	0.00371885	0.169049	2.42959	0.0234375	KIF20B//FAM83D//CEP72
GO:0009893	positive regulation of metabolic process	Biological process	37	3329	128	17653	1.53284	0.0037222	0.169049	2.4292	0.289062	MAP3K20//RIPK2//CCND2//FGF19//PPARG//S100A9//TRAF2//NOTCH1//CDH3//TESC//BRCA1//WNT11//INHBB//NKD2//NCOA6//SHH//BRCA2//ZIC1//CCNA2//TPX2//HSP90AB1//ELOC//WDR5//APLN//DNA2//TFRC//DDN//CKAP2//PDX1//MSX1//NRF1//SREBF2//PEMT//IGF2BP1//ADGRF5//RFC3//SLC39A10
GO:0051276	chromosome organization	Biological process	18	1245	128	17653	1.99394	0.00379332	0.169049	2.42098	0.140625	MAD2L1//NUSAP1//HIRA//BRCA2//DNA2//CHAF1A//HIST1H2BL//HELLS//HSP90AB1//CENPN//NCAPG//TRIP13//CCNA2//RFC3//GINS1//BRCA1//WDR5//YEATS2
GO:0001649	osteoblast differentiation	Biological process	6	205	128	17653	4.03651	0.00382779	0.169049	2.41705	0.046875	SHH//NOTCH1//VCAN//IBSP//HIRA//WNT11
GO:0034613	cellular protein localization	Biological process	23	1762	128	17653	1.80024	0.00384248	0.169049	2.41539	0.179688	RPS14//LARS//CHML//TMED4//GRPEL2//DNAJC15//HSP90AB1//CEP72//WNT11//MSX1//SHH//KIF20B//ZIC1//BRCA2//SLC35D3//ESCO2//TESC//NKD2//FAM83D//PEMT//SREBF2//SELENOI//ANLN
GO:0050794	regulation of cellular process	Biological process	95	11074	128	17653	1.18312	0.00385671	0.169049	2.41378	0.742188	DNA2//MAP3K20//PDX1//MAGEA1//MSX1//NOTCH1//PPARG//YEATS2//RPS14//SHH//SREBF2//RASA1//RIPK2//NRG2//FGF19//DUSP4//WISP1//CCND2//ASPM//S100A9//NME1//SLC39A10//WNT11//CCNA2//DKK3//NKD2//TMED4//LRCH1//LRRIQ4//NTS//NDRG3//S100A11//TRAF2//APLN//CASS4//MCF2L//GNB1L//WSB2//ESCO2//HELLS//BRCA2//NRF1//BRCA1//ELOC//HIRA//TESC//CAMSAP1//CKAP2//KIF20B//MAD2L1//TRIP13//ANLN//TGFBI//ADGRG4//ADGRF5//ADGRG3//IL17C…
GO:0010885	regulation of cholesterol storage	Biological process	2	13	128	17653	21.2175	0.00386163	0.169049	2.41323	0.015625	SREBF2//PPARG
GO:0097152	mesenchymal cell apoptotic process	Biological process	2	13	128	17653	21.2175	0.00386163	0.169049	2.41323	0.015625	SHH//MSX1
GO:1901213	regulation of transcription from RNA polymerase II promoter involved in heart development	Biological process	2	13	128	17653	21.2175	0.00386163	0.169049	2.41323	0.015625	NOTCH1//MSX1
GO:0045893	positive regulation of transcription, DNA-templated	Biological process	20	1450	128	17653	1.90226	0.00387441	0.169049	2.41179	0.15625	NOTCH1//ELOC//WDR5//NCOA6//DDN//CKAP2//PDX1//MSX1//NRF1//PPARG//SHH//BRCA1//SREBF2//ZIC1//RIPK2//APLN//TESC//BRCA2//WNT11//CCNA2
GO:1903508	positive regulation of nucleic acid-templated transcription	Biological process	20	1450	128	17653	1.90226	0.00387441	0.169049	2.41179	0.15625	NOTCH1//NCOA6//PPARG//TESC//SHH//BRCA1//BRCA2//WNT11//ZIC1//CCNA2//ELOC//WDR5//DDN//CKAP2//PDX1//MSX1//NRF1//SREBF2//RIPK2//APLN
GO:1902680	positive regulation of RNA biosynthetic process	Biological process	20	1451	128	17653	1.90095	0.00390457	0.169273	2.40843	0.15625	NOTCH1//NCOA6//PPARG//TESC//SHH//BRCA1//BRCA2//WNT11//ZIC1//CCNA2//ELOC//WDR5//DDN//CKAP2//PDX1//MSX1//NRF1//SREBF2//RIPK2//APLN
GO:0048599	oocyte development	Biological process	3	44	128	17653	9.40323	0.00397003	0.169634	2.40121	0.0234375	BRCA2//TRIP13//INHBB
GO:0051181	cofactor transport	Biological process	3	44	128	17653	9.40323	0.00397003	0.169634	2.40121	0.0234375	SLC19A2//FLVCR1//TCN1
GO:0007155	cell adhesion	Biological process	19	1352	128	17653	1.93814	0.00399862	0.169634	2.39809	0.148438	CRB2//RASA1//CDH3//TGFBI//NOTCH1//CLDN1//SHH//RIPK2//TESC//TFRC//IBSP//S100A9//S100A11//OLFM4//VCAN//B4GALT1//ITGA9//CASS4//WISP1
GO:0030178	negative regulation of Wnt signaling pathway	Biological process	6	207	128	17653	3.99751	0.00401322	0.169634	2.39651	0.046875	DKK3//NOTCH1//SHH//WNT11//BICC1//NKD2
GO:0033043	regulation of organelle organization	Biological process	18	1253	128	17653	1.98121	0.00405636	0.170281	2.39186	0.140625	CAMSAP1//CKAP2//KIF20B//MAD2L1//TRIP13//ANLN//RASA1//C15ORF62//HIRA//BRCA1//NUSAP1//S100A9//WNT11//TPX2//MSX1//SREBF2//PEMT//SELENOI
GO:1903827	regulation of cellular protein localization	Biological process	10	511	128	17653	2.69891	0.00407888	0.170281	2.38946	0.078125	HSP90AB1//SHH//ZIC1//SLC35D3//KIF20B//NKD2//PEMT//SREBF2//SELENOI//CEP72
GO:0070727	cellular macromolecule localization	Biological process	23	1772	128	17653	1.79008	0.00412052	0.170964	2.38505	0.179688	RPS14//LARS//CHML//TMED4//GRPEL2//DNAJC15//HSP90AB1//CEP72//WNT11//MSX1//SHH//KIF20B//ZIC1//BRCA2//SLC35D3//ESCO2//TESC//NKD2//FAM83D//PEMT//SREBF2//SELENOI//ANLN
GO:0009987	cellular process	Biological process	125	16158	128	17653	1.06692	0.0041529	0.171256	2.38165	0.976562	RPS14//CHAF1A//DNA2//NCOA6//RFC3//BRCA1//ESCO2//BRCA2//MAD2L1//NUSAP1//HIRA//MAP3K20//CEP72//CCNA2//ANLN//PDX1//MAGEA1//MSX1//NOTCH1//PPARG//YEATS2//SHH//SREBF2//RASA1//RIPK2//NRG2//FGF19//DUSP4//CAMSAP1//TPX2//CKAP2//RFWD3//CDH3//TRIP13//WISP1//VCAN//IBSP//WNT11//ASPM//FAM83D//CCND2//TGFBI//B4GALT1//S100A9//NME1//SLC39A10//FJX1//IL17C//NRF1//ELOC//ZIC1//GRPEL2//HSP90AB1//HIST1H2BL//PLS3//DRAM1//…
GO:0071897	DNA biosynthetic process	Biological process	6	209	128	17653	3.95926	0.00420523	0.172363	2.37621	0.046875	DNA2//RFC3//BRCA1//BRCA2//HSP90AB1//PPARG
GO:0050789	regulation of biological process	Biological process	99	11709	128	17653	1.16607	0.00434844	0.17716	2.36167	0.773438	DNA2//MAP3K20//PDX1//MAGEA1//MSX1//NOTCH1//PPARG//YEATS2//RPS14//SHH//SREBF2//RASA1//RIPK2//NRG2//FGF19//DUSP4//WISP1//CCND2//APLN//ASPM//S100A9//TRAF2//NME1//SLC39A10//WNT11//CCNA2//DKK3//NKD2//TMED4//LRCH1//LRRIQ4//NTS//NDRG3//S100A11//CASS4//MCF2L//GNB1L//WSB2//ESCO2//HELLS//BRCA1//BRCA2//NRF1//ELOC//HIRA//TESC//CAMSAP1//CKAP2//KIF20B//MAD2L1//TRIP13//ANLN//TGFBI//ADGRG4//ADGRF5//ADGRG3//IL17C…
GO:0006012	galactose metabolic process	Biological process	2	14	128	17653	19.702	0.00448393	0.177784	2.34834	0.015625	GLB1//B4GALT1
GO:0021794	thalamus development	Biological process	2	14	128	17653	19.702	0.00448393	0.177784	2.34834	0.015625	SHH//SRD5A1
GO:0044406	adhesion of symbiont to host	Biological process	2	14	128	17653	19.702	0.00448393	0.177784	2.34834	0.015625	HSP90AB1//INHBB
GO:0045931	positive regulation of mitotic cell cycle	Biological process	5	148	128	17653	4.65926	0.00448684	0.177784	2.34806	0.0390625	NUSAP1//MAD2L1//CCND2//KIF20B//BRCA2
GO:0072132	mesenchyme morphogenesis	Biological process	3	46	128	17653	8.9944	0.0045028	0.177784	2.34652	0.0234375	MSX1//NOTCH1//WNT11
GO:0050678	regulation of epithelial cell proliferation	Biological process	8	357	128	17653	3.09051	0.0045215	0.177784	2.34472	0.0625	CDH3//BRCA2//NME1//NOTCH1//B4GALT1//SHH//PPARG//APLN
GO:0035107	appendage morphogenesis	Biological process	5	149	128	17653	4.62799	0.00461619	0.179421	2.33572	0.0390625	SHH//MSX1//NOTCH1//FLVCR1//MAP3K20
GO:0035108	limb morphogenesis	Biological process	5	149	128	17653	4.62799	0.00461619	0.179421	2.33572	0.0390625	SHH//MSX1//NOTCH1//FLVCR1//MAP3K20
GO:0010212	response to ionizing radiation	Biological process	5	150	128	17653	4.59714	0.00474818	0.183497	2.32347	0.0390625	BRCA2//MAP3K20//CCND2//RFWD3//BRCA1
GO:0065007	biological regulation	Biological process	103	12351	128	17653	1.15012	0.00480611	0.18468	2.31821	0.804688	DNA2//MAP3K20//PDX1//MAGEA1//MSX1//NOTCH1//PPARG//YEATS2//RPS14//SHH//SREBF2//RASA1//RIPK2//NRG2//FGF19//DUSP4//BRCA2//WISP1//CDH3//POC1B//CCND2//APLN//ASPM//S100A9//TRAF2//NME1//SLC39A10//WNT11//CCNA2//DKK3//NKD2//TMED4//LRCH1//LRRIQ4//NTS//NDRG3//S100A11//CASS4//MCF2L//GNB1L//WSB2//ESCO2//HELLS//BRCA1//NRF1//ELOC//HIRA//TESC//SRD5A1//FLVCR1//TFRC//HSP90AB1//CAMSAP1//CKAP2//KIF20B//MAD2L1//TRIP1…
GO:0045184	establishment of protein localization	Biological process	25	2012	128	17653	1.71364	0.00484981	0.185306	2.31428	0.195312	RPS14//LARS//CHML//TMED4//DNAJC15//TESC//RHBDF2//PDX1//GRPEL2//HSP90AB1//TFRC//VSNL1//SHH//ZIC1//PPARG//INHBB//RIPK2//TRAF2//BRCA2//SLC35D3//NOTCH1//KIF20B//PEMT//SREBF2//SELENOI
GO:0006261	DNA-dependent DNA replication	Biological process	5	151	128	17653	4.56669	0.00488283	0.18552	2.31133	0.0390625	DNA2//RFC3//GINS1//RFWD3//BRCA2
GO:0010648	negative regulation of cell communication	Biological process	19	1380	128	17653	1.89882	0.00498465	0.186229	2.30237	0.148438	DUSP4//INHBB//NKD2//NOTCH1//BRCA1//APLN//MAGEA1//RASA1//VSNL1//PPARG//DKK3//SHH//WNT11//BICC1//NRG2//ADGRG3//TRAF2//PDX1//LY6G6D
GO:0000070	mitotic sister chromatid segregation	Biological process	5	152	128	17653	4.53665	0.00502017	0.186229	2.29928	0.0390625	NUSAP1//NCAPG//MAD2L1//TRIP13//HIRA
GO:0006626	protein targeting to mitochondrion	Biological process	5	152	128	17653	4.53665	0.00502017	0.186229	2.29928	0.0390625	GRPEL2//DNAJC15//PEMT//SREBF2//SELENOI
GO:0048562	embryonic organ morphogenesis	Biological process	7	288	128	17653	3.35208	0.00505492	0.186229	2.29629	0.0546875	NOTCH1//SHH//CRB2//ZIC1//MSX1//WNT11//FLVCR1
GO:0010463	mesenchymal cell proliferation	Biological process	3	48	128	17653	8.61963	0.00507686	0.186229	2.2944	0.0234375	SHH//WNT11//MSX1
GO:1905953	negative regulation of lipid localization	Biological process	3	48	128	17653	8.61963	0.00507686	0.186229	2.2944	0.0234375	PPARG//SHH//SREBF2
GO:0023057	negative regulation of signaling	Biological process	19	1384	128	17653	1.89333	0.00514071	0.186229	2.28898	0.148438	DUSP4//INHBB//NKD2//NOTCH1//BRCA1//APLN//MAGEA1//RASA1//VSNL1//PPARG//DKK3//SHH//WNT11//BICC1//NRG2//ADGRG3//TRAF2//PDX1//LY6G6D
GO:0010878	cholesterol storage	Biological process	2	15	128	17653	18.3885	0.00514931	0.186229	2.28825	0.015625	SREBF2//PPARG
GO:0042074	cell migration involved in gastrulation	Biological process	2	15	128	17653	18.3885	0.00514931	0.186229	2.28825	0.015625	CRB2//WNT11
GO:0015031	protein transport	Biological process	24	1914	128	17653	1.72933	0.00519872	0.187016	2.2841	0.1875	RPS14//LARS//CHML//TMED4//PDX1//GRPEL2//DNAJC15//HSP90AB1//TFRC//VSNL1//SHH//ZIC1//PPARG//INHBB//RHBDF2//RIPK2//TRAF2//SLC35D3//NOTCH1//KIF20B//PEMT//SREBF2//SELENOI//TESC
GO:0009994	oocyte differentiation	Biological process	3	49	128	17653	8.44372	0.00537965	0.190677	2.26925	0.0234375	BRCA2//TRIP13//INHBB
GO:0051055	negative regulation of lipid biosynthetic process	Biological process	3	49	128	17653	8.44372	0.00537965	0.190677	2.26925	0.0234375	DKK3//BRCA1//FGF19
GO:0006302	double-strand break repair	Biological process	6	220	128	17653	3.76129	0.00538509	0.190677	2.26881	0.046875	RFWD3//BRCA1//BRCA2//DNA2//ESCO2//TRIP13
GO:0006281	DNA repair	Biological process	10	534	128	17653	2.58266	0.00553344	0.19491	2.257	0.078125	RFWD3//BRCA1//BRCA2//DNA2//RFC3//ESCO2//TRIP13//CHAF1A//NCOA6//EEPD1
GO:0009719	response to endogenous stimulus	Biological process	21	1606	128	17653	1.80336	0.00568276	0.196097	2.24544	0.164062	FGF19//NCOA6//ME1//PPARG//DKK3//LARS//HSP90AB1//CRB2//MSX1//NOTCH1//BRCA1//SRD5A1//INHBB//NME1//CCNA2//APLN//GLB1//RIPK2//SREBF2//CLDN1//LY6G6D
GO:0042306	regulation of protein import into nucleus	Biological process	3	50	128	17653	8.27484	0.00569308	0.196097	2.24465	0.0234375	HSP90AB1//SHH//ZIC1
GO:0048546	digestive tract morphogenesis	Biological process	3	50	128	17653	8.27484	0.00569308	0.196097	2.24465	0.0234375	NOTCH1//SHH//WNT11
GO:0051302	regulation of cell division	Biological process	5	157	128	17653	4.39217	0.00574826	0.196097	2.24046	0.0390625	BRCA2//TAS2R13//KIF20B//ASPM//SHH
GO:1901987	regulation of cell cycle phase transition	Biological process	9	454	128	17653	2.73398	0.00585615	0.196097	2.23239	0.0703125	MAD2L1//TRIP13//ANLN//TPX2//CEP72//RFWD3//BRCA1//CCND2//FAM83D
GO:0001832	blastocyst growth	Biological process	2	16	128	17653	17.2393	0.00585712	0.196097	2.23232	0.015625	BRCA2//GINS1
GO:0003198	epithelial to mesenchymal transition involved in endocardial cushion formation	Biological process	2	16	128	17653	17.2393	0.00585712	0.196097	2.23232	0.015625	MSX1//NOTCH1
GO:0007076	mitotic chromosome condensation	Biological process	2	16	128	17653	17.2393	0.00585712	0.196097	2.23232	0.015625	NUSAP1//NCAPG
GO:0032495	response to muramyl dipeptide	Biological process	2	16	128	17653	17.2393	0.00585712	0.196097	2.23232	0.015625	RIPK2//NOTCH1
GO:0071732	cellular response to nitric oxide	Biological process	2	16	128	17653	17.2393	0.00585712	0.196097	2.23232	0.015625	TRAF2//CCNA2
GO:0043065	positive regulation of apoptotic process	Biological process	11	627	128	17653	2.41954	0.00593366	0.197547	2.22668	0.0859375	PPARG//S100A9//TRAF2//B4GALT1//MSX1//INHBB//MCF2L//NOTCH1//MAP3K20//WNT11//RIPK2
GO:0000075	cell cycle checkpoint	Biological process	6	225	128	17653	3.67771	0.00599485	0.197547	2.22222	0.046875	DNA2//MAP3K20//MAD2L1//TRIP13//RFWD3//BRCA1
GO:0032371	regulation of sterol transport	Biological process	3	51	128	17653	8.11259	0.00601726	0.197547	2.2206	0.0234375	PPARG//SHH//SREBF2
GO:0032374	regulation of cholesterol transport	Biological process	3	51	128	17653	8.11259	0.00601726	0.197547	2.2206	0.0234375	PPARG//SHH//SREBF2
GO:0021510	spinal cord development	Biological process	4	100	128	17653	5.51656	0.00605087	0.197691	2.21818	0.03125	SHH//NOTCH1//SRD5A1//ZIC1
GO:0007010	cytoskeleton organization	Biological process	18	1306	128	17653	1.90081	0.00620893	0.20188	2.20698	0.140625	ANLN//CAMSAP1//PLS3//CKAP2//ASPM//CEP72//BRCA1//RASA1//C15ORF62//RAP1GDS1//S100A9//NUSAP1//SHH//BRCA2//WNT11//TPX2//CASS4//MAP3K20
GO:0060341	regulation of cellular localization	Biological process	13	815	128	17653	2.19986	0.0062616	0.202618	2.20331	0.101562	HSP90AB1//PDX1//VSNL1//SHH//ZIC1//SLC35D3//KIF20B//CDH3//NKD2//PEMT//SREBF2//SELENOI//CEP72
GO:0043068	positive regulation of programmed cell death	Biological process	11	633	128	17653	2.39661	0.0063587	0.204559	2.19663	0.0859375	PPARG//S100A9//TRAF2//MCF2L//NOTCH1//MAP3K20//WNT11//RIPK2//B4GALT1//MSX1//INHBB
GO:0007088	regulation of mitotic nuclear division	Biological process	5	161	128	17653	4.28305	0.00638209	0.204559	2.19504	0.0390625	MAD2L1//TRIP13//ANLN//NUSAP1//KIF20B
GO:0032354	response to follicle-stimulating hormone	Biological process	2	17	128	17653	16.2252	0.00660672	0.208791	2.18001	0.015625	NOTCH1//SRD5A1
GO:0044320	cellular response to leptin stimulus	Biological process	2	17	128	17653	16.2252	0.00660672	0.208791	2.18001	0.015625	INHBB//CCNA2
GO:0045683	negative regulation of epidermis development	Biological process	2	17	128	17653	16.2252	0.00660672	0.208791	2.18001	0.015625	NOTCH1//CDH3
GO:0051254	positive regulation of RNA metabolic process	Biological process	20	1523	128	17653	1.81108	0.0066568	0.209395	2.17673	0.15625	NOTCH1//NCOA6//PPARG//TESC//SHH//BRCA1//BRCA2//WNT11//ZIC1//CCNA2//ELOC//WDR5//DDN//CKAP2//PDX1//MSX1//NRF1//SREBF2//RIPK2//APLN
GO:0071398	cellular response to fatty acid	Biological process	3	53	128	17653	7.80646	0.00669821	0.209722	2.17404	0.0234375	PPARG//CLDN1//NME1
GO:0051128	regulation of cellular component organization	Biological process	28	2403	128	17653	1.60699	0.00684156	0.212729	2.16484	0.21875	WISP1//CAMSAP1//CKAP2//KIF20B//MAD2L1//TRIP13//ANLN//ATP10A//RASA1//C15ORF62//NME1//S100A9//DCBLD2//MSX1//PPARG//NDRG3//WNT11//HIRA//BRCA1//NUSAP1//TPX2//OLFM4//NOTCH1//SREBF2//CLDN1//PEMT//SELENOI//APLN
GO:0006915	apoptotic process	Biological process	24	1958	128	17653	1.69047	0.0068763	0.212729	2.16265	0.1875	SLC39A10//PPARG//S100A9//TRAF2//MAD2L1//MSX1//RASA1//SHH//WNT11//RIPK2//CCND2//BRCA1//INHBB//NME1//BRCA2//MCF2L//NOTCH1//MAP3K20//HSP90AB1//B4GALT1//PDX1//TPX2//CKAP2//DRAM1
GO:0031497	chromatin assembly	Biological process	5	164	128	17653	4.2047	0.00688859	0.212729	2.16187	0.0390625	CHAF1A//HIST1H2BL//HIRA//HELLS//CENPN
GO:0007154	cell communication	Biological process	63	6744	128	17653	1.28834	0.00703158	0.214928	2.15295	0.492188	RASA1//RIPK2//NRG2//FGF19//MAP3K20//DUSP4//S100A9//FJX1//IL17C//SHH//WISP1//NOTCH1//WNT11//DKK3//NKD2//TMED4//LRCH1//LRRIQ4//NTS//PPARG//NDRG3//S100A11//TRAF2//APLN//CASS4//MCF2L//GNB1L//WSB2//BRCA1//BRCA2//ADGRG4//ADGRF5//ADGRG3//TAS2R13//ITGA9//PDX1//CHML//RAP1GDS1//CCNA2//C15ORF62//ZIC1//INHBB//SRD5A1//SREBF2//C2CD4A//MSX1//HSP90AB1//CRB2//NCOA6//DCBLD2//FAM83D//LARS//VSNL1//RHBDF2//CDH3//MAGE…
GO:0007405	neuroblast proliferation	Biological process	3	54	128	17653	7.66189	0.00705516	0.214928	2.15149	0.0234375	ASPM//NOTCH1//SHH
GO:1904589	regulation of protein import	Biological process	3	54	128	17653	7.66189	0.00705516	0.214928	2.15149	0.0234375	HSP90AB1//SHH//ZIC1
GO:0098813	nuclear chromosome segregation	Biological process	7	307	128	17653	3.14462	0.00709919	0.2153	2.14879	0.0546875	MAD2L1//NUSAP1//HIRA//CENPN//NCAPG//TRIP13//FAM83D
GO:0007093	mitotic cell cycle checkpoint	Biological process	5	166	128	17653	4.15404	0.00724151	0.217329	2.14017	0.0390625	MAD2L1//TRIP13//RFWD3//BRCA1//MAP3K20
GO:0002320	lymphoid progenitor cell differentiation	Biological process	2	18	128	17653	15.3238	0.00739749	0.217329	2.13092	0.015625	NOTCH1//SHH
GO:0030011	maintenance of cell polarity	Biological process	2	18	128	17653	15.3238	0.00739749	0.217329	2.13092	0.015625	CRB2//WNT11
GO:0030903	notochord development	Biological process	2	18	128	17653	15.3238	0.00739749	0.217329	2.13092	0.015625	CRB2//WNT11
GO:0032516	positive regulation of phosphoprotein phosphatase activity	Biological process	2	18	128	17653	15.3238	0.00739749	0.217329	2.13092	0.015625	SLC39A10//HSP90AB1
GO:0048714	positive regulation of oligodendrocyte differentiation	Biological process	2	18	128	17653	15.3238	0.00739749	0.217329	2.13092	0.015625	PPARG//SHH
GO:0071371	cellular response to gonadotropin stimulus	Biological process	2	18	128	17653	15.3238	0.00739749	0.217329	2.13092	0.015625	NOTCH1//CCNA2
GO:0051148	negative regulation of muscle cell differentiation	Biological process	3	55	128	17653	7.52259	0.0074232	0.217329	2.12941	0.0234375	NOTCH1//MSX1//SHH
GO:0051179	localization	Biological process	61	6497	128	17653	1.29487	0.00750718	0.218841	2.12452	0.476562	SHH//ASPM//S100A9//NOTCH1//C2CD4A//RPS14//LARS//TCN1//FLVCR1//CHML//TMED4//NKD2//NME1//APLN//SREBF2//PPARG//DNAJC15//TESC//RHBDF2//LRRIQ4//SLC44A5//SLC19A2//FGF19//CASS4//FAM83D//INHBB//PDX1//GRPEL2//ADGRG3//WNT11//ITGA9//TFRC//HSP90AB1//CEP72//SLC35D3//ATP10A//MSX1//KIF20B//VSNL1//NUSAP1//ZIC1//OLFM4//B4GALT1//GLB1//S100A11//S100P//RIPK2//TRAF2//IGF2BP1//CRB2//SAA2//CLDN1//BRCA2//ESCO2//SLC39A10…
GO:0060322	head development	Biological process	12	741	128	17653	2.23343	0.00762209	0.220736	2.11793	0.09375	NCOA6//BRCA2//ZIC1//ROGDI//NME1//SRD5A1//SHH//ASPM//MSX1//IGF2BP1//NOTCH1//FLVCR1
GO:0043009	chordate embryonic development	Biological process	10	560	128	17653	2.46275	0.00763748	0.220736	2.11705	0.078125	FLVCR1//MSX1//NOTCH1//CRB2//BRCA2//GINS1//KIF20B//SHH//WNT11//BRCA1
GO:0007417	central nervous system development	Biological process	14	932	128	17653	2.07167	0.0076709	0.220759	2.11515	0.109375	SHH//NCOA6//BRCA2//ZIC1//ROGDI//S100A9//SRD5A1//NOTCH1//NME1//ASPM//MSX1//IGF2BP1//PPARG//VCAN
GO:0012501	programmed cell death	Biological process	25	2088	128	17653	1.65127	0.00774452	0.220839	2.11101	0.195312	SLC39A10//TPX2//CKAP2//DRAM1//S100A9//BRCA1//RIPK2//PPARG//TRAF2//MAD2L1//MSX1//RASA1//SHH//WNT11//CCND2//INHBB//NME1//BRCA2//MCF2L//NOTCH1//MAP3K20//HSP90AB1//B4GALT1//RPTN//PDX1
GO:0046824	positive regulation of nucleocytoplasmic transport	Biological process	3	56	128	17653	7.38825	0.00780242	0.220839	2.10777	0.0234375	HSP90AB1//SHH//ZIC1
GO:0045944	positive regulation of transcription by RNA polymerase II	Biological process	16	1132	128	17653	1.94932	0.00780881	0.220839	2.10742	0.125	NOTCH1//ELOC//WDR5//APLN//NCOA6//DDN//CKAP2//PDX1//MSX1//NRF1//PPARG//SHH//BRCA1//SREBF2//ZIC1//RIPK2
GO:0019218	regulation of steroid metabolic process	Biological process	4	108	128	17653	5.10793	0.00791235	0.220839	2.10169	0.03125	DKK3//SCD//SREBF2//FGF19
GO:0060249	anatomical structure homeostasis	Biological process	8	393	128	17653	2.80741	0.00792479	0.220839	2.10101	0.0625	BRCA2//DNA2//CDH3//POC1B//HSP90AB1//RFC3//ADGRF5//TFRC
GO:0000819	sister chromatid segregation	Biological process	6	239	128	17653	3.46228	0.00796957	0.220839	2.09857	0.046875	MAD2L1//NUSAP1//HIRA//CENPN//NCAPG//TRIP13
GO:0030308	negative regulation of cell growth	Biological process	5	170	128	17653	4.0563	0.0079849	0.220839	2.09773	0.0390625	DCBLD2//MSX1//PPARG//NDRG3//WNT11
GO:0051099	positive regulation of binding	Biological process	5	170	128	17653	4.0563	0.0079849	0.220839	2.09773	0.0390625	HSP90AB1//RIPK2//NME1//PPARG//TRAF2
GO:0030099	myeloid cell differentiation	Biological process	8	394	128	17653	2.80029	0.00804099	0.220839	2.09469	0.0625	NME1//FLVCR1//RPS14//PPARG//TFRC//TESC//WDR5//NCOA6
GO:0014015	positive regulation of gliogenesis	Biological process	3	57	128	17653	7.25863	0.00819289	0.220839	2.08656	0.0234375	NOTCH1//PPARG//SHH
GO:2000243	positive regulation of reproductive process	Biological process	3	57	128	17653	7.25863	0.00819289	0.220839	2.08656	0.0234375	INHBB//SHH//MSX1
GO:0010628	positive regulation of gene expression	Biological process	23	1877	128	17653	1.68994	0.00821056	0.220839	2.08563	0.179688	NOTCH1//NKD2//NCOA6//PPARG//TESC//SHH//BRCA1//BRCA2//WNT11//ZIC1//CCNA2//ELOC//WDR5//DDN//CKAP2//PDX1//MSX1//NRF1//SREBF2//RIPK2//IGF2BP1//APLN//CDH3
GO:0006978	DNA damage response, signal transduction by p53 class mediator resulting in transcription of p21 class mediator	Biological process	2	19	128	17653	14.5173	0.00822879	0.220839	2.08466	0.015625	BRCA1//BRCA2
GO:0030150	protein import into mitochondrial matrix	Biological process	2	19	128	17653	14.5173	0.00822879	0.220839	2.08466	0.015625	GRPEL2//DNAJC15
GO:0043984	histone H4-K16 acetylation	Biological process	2	19	128	17653	14.5173	0.00822879	0.220839	2.08466	0.015625	BRCA1//WDR5
GO:0071731	response to nitric oxide	Biological process	2	19	128	17653	14.5173	0.00822879	0.220839	2.08466	0.015625	TRAF2//CCNA2
GO:1902170	cellular response to reactive nitrogen species	Biological process	2	19	128	17653	14.5173	0.00822879	0.220839	2.08466	0.015625	TRAF2//CCNA2
GO:0065009	regulation of molecular function	Biological process	36	3373	128	17653	1.47196	0.00831995	0.222402	2.07988	0.28125	MAP3K20//RIPK2//DUSP4//TESC//PPARG//S100A9//TRAF2//SHH//IL17C//INHBB//NTS//APLN//NRG2//FGF19//CRB2//LRCH1//HSP90AB1//TPX2//WNT11//CDH3//ADGRG3//CHML//LARS//RAP1GDS1//RASA1//C15ORF62//NOTCH1//NME1//CCND2//GRPEL2//RFC3//SLC39A10//MAD2L1//LY6G6D//MSX1//MCF2L
GO:0071396	cellular response to lipid	Biological process	10	569	128	17653	2.4238	0.00849471	0.225686	2.07085	0.078125	NCOA6//BRCA1//RIPK2//PPARG//TESC//WNT11//SRD5A1//CCNA2//NME1//CLDN1
GO:0008219	cell death	Biological process	26	2216	128	17653	1.61813	0.00850954	0.225686	2.07009	0.203125	SLC39A10//TPX2//CKAP2//DRAM1//S100A9//BRCA1//RIPK2//PPARG//TRAF2//MAD2L1//MSX1//RASA1//SHH//WNT11//CCND2//INHBB//NME1//BRCA2//MCF2L//NOTCH1//MAP3K20//HSP90AB1//B4GALT1//WISP1//RPTN//PDX1
GO:0051345	positive regulation of hydrolase activity	Biological process	12	754	128	17653	2.19492	0.00869009	0.229574	2.06098	0.09375	PPARG//S100A9//TRAF2//HSP90AB1//CHML//LARS//RAP1GDS1//RASA1//C15ORF62//WNT11//RIPK2//SLC39A10
GO:0045926	negative regulation of growth	Biological process	6	244	128	17653	3.39133	0.00877687	0.23037	2.05666	0.046875	DCBLD2//MSX1//PPARG//NDRG3//WNT11//NOTCH1
GO:0043312	neutrophil degranulation	Biological process	9	485	128	17653	2.55923	0.00885439	0.23037	2.05284	0.0703125	OLFM4//ADGRG3//B4GALT1//GLB1//HSP90AB1//S100A9//S100A11//S100P//TCN1
GO:1901700	response to oxygen-containing compound	Biological process	20	1565	128	17653	1.76248	0.00889441	0.23037	2.05088	0.15625	ME1//LARS//RIPK2//NOTCH1//CLDN1//PPARG//INHBB//SRD5A1//NME1//CCNA2//PDX1//VSNL1//HSP90AB1//PEMT//GLB1//TESC//WNT11//BRCA1//TRAF2//LY6G6D
GO:1901701	cellular response to oxygen-containing compound	Biological process	15	1048	128	17653	1.97396	0.00892073	0.23037	2.0496	0.117188	LARS//RIPK2//INHBB//PPARG//SRD5A1//PDX1//VSNL1//TESC//WNT11//CCNA2//NME1//BRCA1//TRAF2//LY6G6D//CLDN1
GO:0042981	regulation of apoptotic process	Biological process	20	1566	128	17653	1.76135	0.00895435	0.23037	2.04797	0.15625	SLC39A10//PPARG//S100A9//TRAF2//MAD2L1//MSX1//RASA1//SHH//WNT11//RIPK2//CCND2//MCF2L//NOTCH1//MAP3K20//HSP90AB1//B4GALT1//BRCA1//PDX1//INHBB//NME1
GO:0032940	secretion by cell	Biological process	19	1461	128	17653	1.79354	0.00902607	0.23037	2.0445	0.148438	NKD2//C2CD4A//INHBB//PDX1//VSNL1//OLFM4//ADGRG3//B4GALT1//GLB1//HSP90AB1//S100A9//S100A11//S100P//TCN1//NOTCH1//RHBDF2//RIPK2//TRAF2//APLN
GO:0030325	adrenal gland development	Biological process	2	20	128	17653	13.7914	0.0091	0.23037	2.04096	0.015625	DKK3//WNT11
GO:0032372	negative regulation of sterol transport	Biological process	2	20	128	17653	13.7914	0.0091	0.23037	2.04096	0.015625	SHH//SREBF2
GO:0032375	negative regulation of cholesterol transport	Biological process	2	20	128	17653	13.7914	0.0091	0.23037	2.04096	0.015625	SHH//SREBF2
GO:0042772	DNA damage response, signal transduction resulting in transcription	Biological process	2	20	128	17653	13.7914	0.0091	0.23037	2.04096	0.015625	BRCA1//BRCA2
GO:0071404	cellular response to low-density lipoprotein particle stimulus	Biological process	2	20	128	17653	13.7914	0.0091	0.23037	2.04096	0.015625	PPARG//SREBF2
GO:0002283	neutrophil activation involved in immune response	Biological process	9	488	128	17653	2.5435	0.00919697	0.23037	2.03636	0.0703125	OLFM4//ADGRG3//B4GALT1//GLB1//HSP90AB1//S100A9//S100A11//S100P//TCN1
GO:0048736	appendage development	Biological process	5	176	128	17653	3.91801	0.00919709	0.23037	2.03635	0.0390625	SHH//MSX1//NOTCH1//FLVCR1//MAP3K20
GO:0060173	limb development	Biological process	5	176	128	17653	3.91801	0.00919709	0.23037	2.03635	0.0390625	SHH//MSX1//NOTCH1//FLVCR1//MAP3K20
GO:0042594	response to starvation	Biological process	5	177	128	17653	3.89588	0.00941079	0.233469	2.02637	0.0390625	INHBB//SRD5A1//SREBF2//LARS//PPARG
GO:1901796	regulation of signal transduction by p53 class mediator	Biological process	5	177	128	17653	3.89588	0.00941079	0.233469	2.02637	0.0390625	MSX1//DNA2//TPX2//RFC3//BRCA1
GO:0009792	embryo development ending in birth or egg hatching	Biological process	10	578	128	17653	2.38606	0.00942437	0.233469	2.02575	0.078125	FLVCR1//MSX1//NOTCH1//CRB2//BRCA2//GINS1//KIF20B//SHH//BRCA1//WNT11
GO:0032501	multicellular organismal process	Biological process	68	7496	128	17653	1.25109	0.0094777	0.233933	2.0233	0.53125	WDR5//VCAN//TGFBI//APLN//INHBB//BRCA2//TRIP13//FLVCR1//SHH//RASA1//TAS2R13//IBSP//HIRA//WNT11//SRD5A1//MSX1//NOTCH1//DUSP4//CRB2//ASPM//S100A9//GINS1//FAM83D//KIF20B//PDX1//HSP90AB1//PPARG//CDH3//POC1B//NHS//ESCO2//ANLN//TRAF2//NME1//HELLS//NRF1//NDRG3//CIP2A//B4GALT1//BICC1//ZIC1//COL9A1//FGF19//NCOA6//ROGDI//CCND2//CLDN1//BRCA1//FJX1//RAP1GDS1//IGF2BP1//ADGRG3//RPS14//TFRC//DKK3//TESC//CCNA2//C…
GO:0046916	cellular transition metal ion homeostasis	Biological process	4	114	128	17653	4.83909	0.00953156	0.234407	2.02084	0.03125	FLVCR1//TFRC//SLC39A10//S100A9
GO:0043067	regulation of programmed cell death	Biological process	20	1579	128	17653	1.74685	0.00976402	0.239254	2.01037	0.15625	SLC39A10//PPARG//S100A9//TRAF2//MAD2L1//MSX1//RASA1//SHH//WNT11//RIPK2//CCND2//INHBB//NME1//BRCA1//MCF2L//NOTCH1//MAP3K20//HSP90AB1//B4GALT1//PDX1
GO:0050673	epithelial cell proliferation	Biological process	8	409	128	17653	2.69759	0.00994237	0.240929	2.00251	0.0625	CDH3//BRCA2//NME1//NOTCH1//B4GALT1//SHH//PPARG//APLN
GO:0071363	cellular response to growth factor stimulus	Biological process	11	674	128	17653	2.25082	0.00994265	0.240929	2.0025	0.0859375	FGF19//DKK3//HSP90AB1//CRB2//MSX1//NOTCH1//CCNA2//APLN//CLDN1//IBSP//SRD5A1
GO:0003272	endocardial cushion formation	Biological process	2	21	128	17653	13.1347	0.0100105	0.240929	1.99954	0.015625	MSX1//NOTCH1
GO:0044321	response to leptin	Biological process	2	21	128	17653	13.1347	0.0100105	0.240929	1.99954	0.015625	INHBB//CCNA2
GO:0061436	establishment of skin barrier	Biological process	2	21	128	17653	13.1347	0.0100105	0.240929	1.99954	0.015625	RPTN//CLDN1
GO:0001101	response to acid chemical	Biological process	7	329	128	17653	2.93434	0.0101701	0.243901	1.99268	0.0546875	LARS//PPARG//PEMT//TESC//WNT11//NME1//CLDN1
GO:0072091	regulation of stem cell proliferation	Biological process	3	62	128	17653	6.67326	0.0103165	0.246538	1.98647	0.0234375	ASPM//NOTCH1//SHH
GO:0010941	regulation of cell death	Biological process	21	1696	128	17653	1.70766	0.0103555	0.246598	1.98483	0.164062	SLC39A10//PPARG//S100A9//TRAF2//MAD2L1//MSX1//RASA1//SHH//WNT11//RIPK2//CCND2//INHBB//NME1//BRCA1//MCF2L//NOTCH1//MAP3K20//HSP90AB1//B4GALT1//WISP1//PDX1
GO:0042119	neutrophil activation	Biological process	9	498	128	17653	2.49242	0.010412	0.2467	1.98247	0.0703125	OLFM4//ADGRG3//B4GALT1//GLB1//HSP90AB1//S100A9//S100A11//S100P//TCN1
GO:0006887	exocytosis	Biological process	13	869	128	17653	2.06316	0.0104327	0.2467	1.9816	0.101562	C2CD4A//OLFM4//ADGRG3//B4GALT1//GLB1//HSP90AB1//S100A9//S100A11//S100P//TCN1//VSNL1//NOTCH1//NKD2
GO:0046903	secretion	Biological process	20	1591	128	17653	1.73368	0.0105632	0.248917	1.9762	0.15625	S100A9//NKD2//NME1//APLN//C2CD4A//INHBB//PDX1//VSNL1//OLFM4//ADGRG3//B4GALT1//GLB1//HSP90AB1//S100A11//S100P//TCN1//NOTCH1//RHBDF2//RIPK2//TRAF2
GO:0002446	neutrophil mediated immunity	Biological process	9	500	128	17653	2.48245	0.0106689	0.249579	1.97188	0.0703125	OLFM4//ADGRG3//B4GALT1//GLB1//HSP90AB1//S100A9//S100A11//S100P//TCN1
GO:0010942	positive regulation of cell death	Biological process	11	681	128	17653	2.22769	0.0106857	0.249579	1.9712	0.0859375	PPARG//S100A9//TRAF2//MCF2L//NOTCH1//MAP3K20//WNT11//RIPK2//B4GALT1//MSX1//INHBB
GO:0009968	negative regulation of signal transduction	Biological process	17	1276	128	17653	1.83741	0.0107496	0.249579	1.96861	0.132812	DUSP4//NKD2//NOTCH1//BRCA1//APLN//MAGEA1//RASA1//PPARG//DKK3//SHH//WNT11//BICC1//NRG2//ADGRG3//TRAF2//PDX1//LY6G6D
GO:1901654	response to ketone	Biological process	5	183	128	17653	3.76814	0.0107653	0.249579	1.96797	0.0390625	NME1//GLB1//PPARG//SRD5A1//CLDN1
GO:0043967	histone H4 acetylation	Biological process	3	63	128	17653	6.56734	0.0107758	0.249579	1.96755	0.0234375	WDR5//BRCA1//BRCA2
GO:0009651	response to salt stress	Biological process	2	22	128	17653	12.5376	0.0109597	0.252111	1.9602	0.015625	CLDN1//HSP90AB1
GO:0030539	male genitalia development	Biological process	2	22	128	17653	12.5376	0.0109597	0.252111	1.9602	0.015625	SHH//SRD5A1
GO:0002366	leukocyte activation involved in immune response	Biological process	11	685	128	17653	2.21468	0.0111292	0.253948	1.95354	0.0859375	OLFM4//ADGRG3//B4GALT1//GLB1//HSP90AB1//S100A9//S100A11//S100P//TCN1//RIPK2//TFRC
GO:0007165	signal transduction	Biological process	58	6210	128	17653	1.28809	0.0111452	0.253948	1.95291	0.453125	RASA1//RIPK2//NRG2//FGF19//MAP3K20//DUSP4//S100A9//NOTCH1//WNT11//DKK3//NKD2//WISP1//CASS4//MCF2L//GNB1L//WSB2//BRCA1//BRCA2//ADGRG4//ADGRF5//ADGRG3//IL17C//NTS//TAS2R13//PPARG//APLN//SHH//ITGA9//TRAF2//PDX1//CHML//RAP1GDS1//CCNA2//C15ORF62//ZIC1//INHBB//MSX1//HSP90AB1//CRB2//NCOA6//DCBLD2//FAM83D//RHBDF2//TMED4//CDH3//MAGEA1//SLC39A10//BICC1//ASPM//LY6G6D//DNA2//TPX2//RFC3//LARS//LRCH1//LRRIQ4//…
GO:0016055	Wnt signaling pathway	Biological process	9	504	128	17653	2.46275	0.011197	0.253948	1.9509	0.0703125	WNT11//SHH//NKD2//CDH3//DKK3//NOTCH1//BICC1//ASPM//WISP1
GO:0036230	granulocyte activation	Biological process	9	504	128	17653	2.46275	0.011197	0.253948	1.9509	0.0703125	OLFM4//ADGRG3//B4GALT1//GLB1//HSP90AB1//S100A9//S100A11//S100P//TCN1
GO:0051298	centrosome duplication	Biological process	3	64	128	17653	6.46472	0.0112469	0.253948	1.94897	0.0234375	CEP72//BRCA1//BRCA2
GO:0007178	transmembrane receptor protein serine/threonine kinase signaling pathway	Biological process	7	336	128	17653	2.87321	0.0113246	0.253948	1.94598	0.0546875	INHBB//DKK3//HSP90AB1//CRB2//MSX1//NOTCH1//SHH
GO:0060485	mesenchyme development	Biological process	6	258	128	17653	3.2073	0.0113478	0.253948	1.94509	0.046875	SHH//NOTCH1//WNT11//FAM83D//MSX1//CRB2
GO:1901990	regulation of mitotic cell cycle phase transition	Biological process	8	419	128	17653	2.6332	0.0113842	0.253948	1.9437	0.0625	MAD2L1//TRIP13//ANLN//TPX2//CEP72//RFWD3//BRCA1//CCND2
GO:0051049	regulation of transport	Biological process	22	1821	128	17653	1.66618	0.0114038	0.253948	1.94295	0.171875	S100A9//FGF19//INHBB//C2CD4A//TESC//HSP90AB1//PDX1//VSNL1//SHH//ZIC1//NOTCH1//RHBDF2//RIPK2//TRAF2//APLN//PPARG//SLC35D3//SREBF2//KIF20B//CDH3//PEMT//SELENOI
GO:0198738	cell-cell signaling by wnt	Biological process	9	506	128	17653	2.45302	0.0114683	0.253948	1.9405	0.0703125	WNT11//DKK3//NKD2//WISP1//SHH//CDH3//NOTCH1//BICC1//ASPM
GO:0006694	steroid biosynthetic process	Biological process	5	186	128	17653	3.70737	0.0114902	0.253948	1.93967	0.0390625	SRD5A1//DKK3//SCD//SREBF2//FGF19
GO:0007369	gastrulation	Biological process	5	186	128	17653	3.70737	0.0114902	0.253948	1.93967	0.0390625	DUSP4//CRB2//WNT11//HIRA//APLN
GO:0002263	cell activation involved in immune response	Biological process	11	689	128	17653	2.20182	0.0115866	0.255245	1.93604	0.0859375	OLFM4//ADGRG3//B4GALT1//GLB1//HSP90AB1//S100A9//S100A11//S100P//TCN1//RIPK2//TFRC
GO:0045685	regulation of glial cell differentiation	Biological process	3	65	128	17653	6.36526	0.0117297	0.256726	1.93071	0.0234375	NOTCH1//PPARG//SHH
GO:1900182	positive regulation of protein localization to nucleus	Biological process	3	65	128	17653	6.36526	0.0117297	0.256726	1.93071	0.0234375	HSP90AB1//SHH//ZIC1
GO:0007026	negative regulation of microtubule depolymerization	Biological process	2	23	128	17653	11.9925	0.011947	0.257318	1.92274	0.015625	CAMSAP1//CKAP2
GO:0007141	male meiosis I	Biological process	2	23	128	17653	11.9925	0.011947	0.257318	1.92274	0.015625	BRCA2//TRIP13
GO:0010894	negative regulation of steroid biosynthetic process	Biological process	2	23	128	17653	11.9925	0.011947	0.257318	1.92274	0.015625	DKK3//FGF19
GO:0032506	cytokinetic process	Biological process	2	23	128	17653	11.9925	0.011947	0.257318	1.92274	0.015625	ANLN//KIF20B
GO:0033561	regulation of water loss via skin	Biological process	2	23	128	17653	11.9925	0.011947	0.257318	1.92274	0.015625	RPTN//CLDN1
GO:0042592	homeostatic process	Biological process	21	1720	128	17653	1.68383	0.0120254	0.258183	1.9199	0.164062	BRCA2//DNA2//CDH3//POC1B//FLVCR1//TFRC//SLC39A10//HSP90AB1//RPS14//APLN//S100A9//RFC3//RAP1GDS1//PDX1//VSNL1//ADGRF5//PPARG//RPTN//CLDN1//NME1//SLC35D3
GO:0030198	extracellular matrix organization	Biological process	7	341	128	17653	2.83108	0.0122057	0.261224	1.91344	0.0546875	NOTCH1//COL9A1//VCAN//B4GALT1//IBSP//ITGA9//TGFBI
GO:0006333	chromatin assembly or disassembly	Biological process	5	190	128	17653	3.62932	0.0125076	0.265956	1.90283	0.0390625	CHAF1A//HIST1H2BL//HIRA//HELLS//CENPN
GO:0006473	protein acetylation	Biological process	5	190	128	17653	3.62932	0.0125076	0.265956	1.90283	0.0390625	ESCO2//BRCA1//WDR5//YEATS2//BRCA2
GO:0008610	lipid biosynthetic process	Biological process	11	697	128	17653	2.17655	0.0125447	0.265956	1.90154	0.0859375	BRCA1//SCD//SELENOI//PEMT//SLC44A5//SRD5A1//FAR1//DKK3//FGF19//SREBF2//ADGRF5
GO:0046330	positive regulation of JNK cascade	Biological process	4	124	128	17653	4.44884	0.0126829	0.268044	1.89678	0.03125	MAP3K20//TRAF2//RIPK2//FGF19
GO:0030111	regulation of Wnt signaling pathway	Biological process	7	344	128	17653	2.80639	0.0127575	0.268176	1.89423	0.0546875	SHH//NKD2//DKK3//NOTCH1//WNT11//BICC1//ASPM
GO:0044770	cell cycle phase transition	Biological process	10	606	128	17653	2.27581	0.0128215	0.268176	1.89206	0.078125	CEP72//CCNA2//MAD2L1//TRIP13//ANLN//TPX2//RFWD3//BRCA1//CCND2//FAM83D
GO:0007420	brain development	Biological process	11	700	128	17653	2.16722	0.0129192	0.268176	1.88876	0.0859375	NME1//SRD5A1//SHH//ASPM//MSX1//IGF2BP1//NOTCH1//NCOA6//BRCA2//ZIC1//ROGDI
GO:0001556	oocyte maturation	Biological process	2	24	128	17653	11.4928	0.0129718	0.268176	1.887	0.015625	BRCA2//TRIP13
GO:0048103	somatic stem cell division	Biological process	2	24	128	17653	11.4928	0.0129718	0.268176	1.887	0.015625	ASPM//NOTCH1
GO:0060330	regulation of response to interferon-gamma	Biological process	2	24	128	17653	11.4928	0.0129718	0.268176	1.887	0.015625	HSP90AB1//PPARG
GO:0060334	regulation of interferon-gamma-mediated signaling pathway	Biological process	2	24	128	17653	11.4928	0.0129718	0.268176	1.887	0.015625	PPARG//HSP90AB1
GO:0072655	establishment of protein localization to mitochondrion	Biological process	5	192	128	17653	3.59151	0.0130385	0.268176	1.88477	0.0390625	GRPEL2//DNAJC15//PEMT//SREBF2//SELENOI
GO:0070848	response to growth factor	Biological process	11	701	128	17653	2.16413	0.013046	0.268176	1.88452	0.0859375	FGF19//DKK3//HSP90AB1//CRB2//MSX1//NOTCH1//CCNA2//APLN//IBSP//SRD5A1//CLDN1
GO:0048608	reproductive structure development	Biological process	8	430	128	17653	2.56584	0.0131431	0.269353	1.8813	0.0625	INHBB//HSP90AB1//PPARG//ASPM//SRD5A1//BRCA2//SHH//NOTCH1
GO:0010647	positive regulation of cell communication	Biological process	21	1737	128	17653	1.66735	0.0133348	0.272457	1.87501	0.164062	MAP3K20//RIPK2//TRAF2//INHBB//SHH//HSP90AB1//CRB2//MSX1//NOTCH1//PDX1//VSNL1//TMED4//CDH3//FGF19//SLC39A10//APLN//NRG2//WNT11//ASPM//LARS//S100A9
GO:0046887	positive regulation of hormone secretion	Biological process	4	126	128	17653	4.37822	0.0133838	0.272635	1.87342	0.03125	INHBB//PDX1//VSNL1//APLN
GO:0061458	reproductive system development	Biological process	8	433	128	17653	2.54807	0.0136556	0.277336	1.86469	0.0625	INHBB//HSP90AB1//PPARG//ASPM//SRD5A1//BRCA2//SHH//NOTCH1
GO:0007292	female gamete generation	Biological process	4	127	128	17653	4.34375	0.0137434	0.27735	1.86191	0.03125	BRCA2//TRIP13//ASPM//INHBB
GO:0048708	astrocyte differentiation	Biological process	3	69	128	17653	5.99626	0.0137793	0.27735	1.86077	0.0234375	S100A9//NOTCH1//SHH
GO:0071300	cellular response to retinoic acid	Biological process	3	69	128	17653	5.99626	0.0137793	0.27735	1.86077	0.0234375	PPARG//TESC//WNT11
GO:0023056	positive regulation of signaling	Biological process	21	1743	128	17653	1.66162	0.0138234	0.277385	1.85938	0.164062	MAP3K20//RIPK2//TRAF2//INHBB//SHH//HSP90AB1//CRB2//MSX1//NOTCH1//PDX1//VSNL1//TMED4//CDH3//FGF19//SLC39A10//APLN//NRG2//WNT11//ASPM//LARS//S100A9
GO:0070585	protein localization to mitochondrion	Biological process	5	195	128	17653	3.53626	0.0138631	0.277385	1.85814	0.0390625	GRPEL2//DNAJC15//PEMT//SREBF2//SELENOI
GO:0000729	DNA double-strand break processing	Biological process	2	25	128	17653	11.0331	0.0140335	0.277511	1.85283	0.015625	DNA2//BRCA1
GO:0045939	negative regulation of steroid metabolic process	Biological process	2	25	128	17653	11.0331	0.0140335	0.277511	1.85283	0.015625	DKK3//FGF19
GO:0055094	response to lipoprotein particle	Biological process	2	25	128	17653	11.0331	0.0140335	0.277511	1.85283	0.015625	PPARG//SREBF2
GO:0060561	apoptotic process involved in morphogenesis	Biological process	2	25	128	17653	11.0331	0.0140335	0.277511	1.85283	0.015625	B4GALT1//NOTCH1
GO:0060548	negative regulation of cell death	Biological process	14	1005	128	17653	1.92119	0.0142129	0.280239	1.84732	0.109375	SLC39A10//MAD2L1//MSX1//RASA1//SHH//WNT11//RIPK2//CCND2//TRAF2//HSP90AB1//BRCA1//PDX1//NOTCH1//WISP1
GO:0072331	signal transduction by p53 class mediator	Biological process	6	272	128	17653	3.04222	0.0144116	0.282508	1.84129	0.046875	BRCA1//BRCA2//MSX1//DNA2//TPX2//RFC3
GO:0090287	regulation of cellular response to growth factor stimulus	Biological process	6	272	128	17653	3.04222	0.0144116	0.282508	1.84129	0.046875	DKK3//HSP90AB1//CRB2//MSX1//NOTCH1//APLN
GO:0017038	protein import	Biological process	5	198	128	17653	3.48268	0.0147222	0.287764	1.83203	0.0390625	GRPEL2//DNAJC15//HSP90AB1//SHH//ZIC1
GO:0043066	negative regulation of apoptotic process	Biological process	13	911	128	17653	1.96804	0.014979	0.291553	1.82452	0.101562	SLC39A10//TRAF2//HSP90AB1//RASA1//BRCA1//PDX1//NOTCH1//SHH//MAD2L1//MSX1//WNT11//RIPK2//CCND2
GO:0048583	regulation of response to stimulus	Biological process	42	4243	128	17653	1.36516	0.0150065	0.291553	1.82372	0.328125	MAP3K20//RIPK2//DUSP4//S100A9//PPARG//TRAF2//ZIC1//IL17C//INHBB//NTS//SHH//APLN//NRG2//FGF19//DKK3//NKD2//HSP90AB1//CRB2//MSX1//NOTCH1//FAM83D//BRCA1//MCF2L//PDX1//VSNL1//RHBDF2//TMED4//CDH3//MAGEA1//TFRC//RASA1//SLC39A10//WNT11//BICC1//ASPM//ADGRG3//DNA2//TPX2//RFC3//LARS//RFWD3//LY6G6D
GO:0042481	regulation of odontogenesis	Biological process	2	26	128	17653	10.6088	0.0151316	0.291553	1.82012	0.015625	MSX1//SHH
GO:0060740	prostate gland epithelium morphogenesis	Biological process	2	26	128	17653	10.6088	0.0151316	0.291553	1.82012	0.015625	SHH//NOTCH1
GO:1904706	negative regulation of vascular smooth muscle cell proliferation	Biological process	2	26	128	17653	10.6088	0.0151316	0.291553	1.82012	0.015625	PPARG//APLN
GO:0043299	leukocyte degranulation	Biological process	9	532	128	17653	2.33313	0.0154615	0.297063	1.81075	0.0703125	OLFM4//ADGRG3//B4GALT1//GLB1//HSP90AB1//S100A9//S100A11//S100P//TCN1
GO:0002274	myeloid leukocyte activation	Biological process	10	625	128	17653	2.20662	0.015606	0.298666	1.80671	0.078125	ADGRF5//OLFM4//ADGRG3//B4GALT1//GLB1//HSP90AB1//S100A9//S100A11//S100P//TCN1
GO:0050671	positive regulation of lymphocyte proliferation	Biological process	4	132	128	17653	4.17921	0.0156332	0.298666	1.80595	0.03125	SLC39A10//TFRC//RIPK2//SHH
GO:0002376	immune system process	Biological process	32	3038	128	17653	1.45268	0.0160245	0.303669	1.79522	0.25	S100A9//ESCO2//ANLN//RIPK2//SHH//NOTCH1//TRAF2//NME1//APLN//BRCA2//ROGDI//NCOA6//ADGRG3//FLVCR1//RPS14//PPARG//TFRC//ITGA9//TESC//SLC39A10//HSP90AB1//ADGRF5//OLFM4//B4GALT1//GLB1//S100A11//S100P//TCN1//WDR5//HELLS//CLDN1//LRCH1
GO:0032946	positive regulation of mononuclear cell proliferation	Biological process	4	133	128	17653	4.14779	0.0160298	0.303669	1.79507	0.03125	SLC39A10//TFRC//RIPK2//SHH
GO:0048565	digestive tract development	Biological process	4	133	128	17653	4.14779	0.0160298	0.303669	1.79507	0.03125	NOTCH1//SHH//WNT11//PDX1
GO:0031069	hair follicle morphogenesis	Biological process	2	27	128	17653	10.2159	0.0162654	0.303875	1.78874	0.015625	NOTCH1//SHH
GO:0031114	regulation of microtubule depolymerization	Biological process	2	27	128	17653	10.2159	0.0162654	0.303875	1.78874	0.015625	CAMSAP1//CKAP2
GO:0032201	telomere maintenance via semi-conservative replication	Biological process	2	27	128	17653	10.2159	0.0162654	0.303875	1.78874	0.015625	DNA2//RFC3
GO:0034243	regulation of transcription elongation from RNA polymerase II promoter	Biological process	2	27	128	17653	10.2159	0.0162654	0.303875	1.78874	0.015625	ELOC//SHH
GO:0071402	cellular response to lipoprotein particle stimulus	Biological process	2	27	128	17653	10.2159	0.0162654	0.303875	1.78874	0.015625	PPARG//SREBF2
GO:0006974	cellular response to DNA damage stimulus	Biological process	12	822	128	17653	2.01334	0.0163175	0.304009	1.78735	0.09375	MAP3K20//RFWD3//BRCA1//BRCA2//DNA2//RFC3//CHAF1A//NCOA6//EEPD1//ESCO2//TRIP13//MSX1
GO:0043627	response to estrogen	Biological process	3	74	128	17653	5.59111	0.0166102	0.306787	1.77962	0.0234375	PPARG//SRD5A1//BRCA1
GO:0046128	purine ribonucleoside metabolic process	Biological process	3	74	128	17653	5.59111	0.0166102	0.306787	1.77962	0.0234375	NME1//MOCOS//PEMT
GO:0051234	establishment of localization	Biological process	49	5155	128	17653	1.31092	0.0166448	0.306787	1.77872	0.382812	S100A9//C2CD4A//RPS14//LARS//TCN1//FLVCR1//CHML//TMED4//NKD2//NME1//SHH//APLN//DNAJC15//TESC//RHBDF2//LRRIQ4//SLC44A5//SLC19A2//PPARG//FGF19//INHBB//PDX1//GRPEL2//TFRC//HSP90AB1//SLC35D3//ATP10A//VSNL1//NUSAP1//ZIC1//OLFM4//ADGRG3//B4GALT1//GLB1//S100A11//S100P//NOTCH1//RIPK2//TRAF2//IGF2BP1//FAM83D//CLDN1//BRCA2//SLC39A10//SREBF2//KIF20B//CDH3//PEMT//SELENOI
GO:0043069	negative regulation of programmed cell death	Biological process	13	924	128	17653	1.94035	0.0166573	0.306787	1.77839	0.101562	SLC39A10//MAD2L1//MSX1//RASA1//SHH//WNT11//RIPK2//CCND2//TRAF2//HSP90AB1//BRCA1//PDX1//NOTCH1
GO:0002275	myeloid cell activation involved in immune response	Biological process	9	539	128	17653	2.30283	0.0166934	0.306787	1.77746	0.0703125	OLFM4//ADGRG3//B4GALT1//GLB1//HSP90AB1//S100A9//S100A11//S100P//TCN1
GO:0023052	signaling	Biological process	61	6724	128	17653	1.25115	0.0167744	0.30744	1.77535	0.476562	RASA1//RIPK2//NRG2//FGF19//MAP3K20//DUSP4//S100A9//FJX1//IL17C//SHH//WISP1//NOTCH1//WNT11//DKK3//NKD2//TMED4//LRCH1//LRRIQ4//NTS//PPARG//NDRG3//S100A11//TRAF2//APLN//CASS4//MCF2L//GNB1L//WSB2//BRCA1//BRCA2//ADGRG4//ADGRF5//ADGRG3//TAS2R13//ITGA9//PDX1//CHML//RAP1GDS1//CCNA2//C15ORF62//ZIC1//INHBB//C2CD4A//MSX1//HSP90AB1//CRB2//NCOA6//DCBLD2//FAM83D//VSNL1//RHBDF2//CDH3//MAGEA1//SLC39A10//BICC1//A…
GO:0007167	enzyme linked receptor protein signaling pathway	Biological process	14	1028	128	17653	1.87821	0.0169878	0.310509	1.76986	0.109375	CASS4//FGF19//INHBB//DKK3//HSP90AB1//CRB2//MSX1//NOTCH1//SHH//NRG2//APLN//RHBDF2//CDH3//RASA1
GO:0030900	forebrain development	Biological process	7	366	128	17653	2.6377	0.0173675	0.313587	1.76026	0.0546875	NME1//SRD5A1//SHH//ASPM//MSX1//IGF2BP1//NOTCH1
GO:0032879	regulation of localization	Biological process	29	2700	128	17653	1.4813	0.0173769	0.313587	1.76003	0.226562	S100A9//SREBF2//PPARG//FGF19//INHBB//C2CD4A//ADGRG3//NOTCH1//WNT11//SHH//TESC//HSP90AB1//PDX1//VSNL1//ZIC1//RHBDF2//RIPK2//TRAF2//B4GALT1//APLN//SLC35D3//KIF20B//CDH3//NKD2//PEMT//SELENOI//CEP72//NRG2//LRCH1
GO:0008209	androgen metabolic process	Biological process	2	28	128	17653	9.851	0.0174344	0.313587	1.75859	0.015625	SRD5A1//SHH
GO:0010874	regulation of cholesterol efflux	Biological process	2	28	128	17653	9.851	0.0174344	0.313587	1.75859	0.015625	SHH//SREBF2
GO:0060512	prostate gland morphogenesis	Biological process	2	28	128	17653	9.851	0.0174344	0.313587	1.75859	0.015625	SHH//NOTCH1
GO:0061311	cell surface receptor signaling pathway involved in heart development	Biological process	2	28	128	17653	9.851	0.0174344	0.313587	1.75859	0.015625	NOTCH1//MSX1
GO:0006790	sulfur compound metabolic process	Biological process	7	367	128	17653	2.63051	0.0176017	0.315186	1.75445	0.0546875	B4GALT1//VCAN//FAR1//GLB1//SLC19A2//PEMT//SCD
GO:0002444	myeloid leukocyte mediated immunity	Biological process	9	544	128	17653	2.28167	0.0176165	0.315186	1.75408	0.0703125	OLFM4//ADGRG3//B4GALT1//GLB1//HSP90AB1//S100A9//S100A11//S100P//TCN1
GO:0001889	liver development	Biological process	4	137	128	17653	4.02669	0.0176793	0.315379	1.75253	0.03125	CLDN1//PDX1//NOTCH1//SRD5A1
GO:0021536	diencephalon development	Biological process	3	76	128	17653	5.44398	0.017827	0.315379	1.74892	0.0234375	SHH//SRD5A1//MSX1
GO:0031669	cellular response to nutrient levels	Biological process	5	208	128	17653	3.31524	0.0178424	0.315379	1.74855	0.0390625	INHBB//SRD5A1//SREBF2//LARS//PPARG
GO:0043583	ear development	Biological process	5	208	128	17653	3.31524	0.0178424	0.315379	1.74855	0.0390625	NOTCH1//ZIC1//MSX1//SHH//CCNA2
GO:0002791	regulation of peptide secretion	Biological process	8	455	128	17653	2.42486	0.0178721	0.315379	1.74783	0.0625	S100A9//PDX1//VSNL1//INHBB//RHBDF2//RIPK2//TRAF2//APLN
GO:0071495	cellular response to endogenous stimulus	Biological process	17	1350	128	17653	1.7367	0.0179071	0.315379	1.74698	0.132812	FGF19//PPARG//DKK3//LARS//HSP90AB1//CRB2//MSX1//NOTCH1//NCOA6//BRCA1//INHBB//SRD5A1//CCNA2//APLN//RIPK2//CLDN1//LY6G6D
GO:1902531	regulation of intracellular signal transduction	Biological process	22	1901	128	17653	1.59606	0.0180643	0.317321	1.74318	0.171875	MAP3K20//RIPK2//DUSP4//TRAF2//FAM83D//MCF2L//TMED4//INHBB//MSX1//FGF19//NOTCH1//RASA1//NRG2//WNT11//ADGRG3//DNA2//TPX2//RFC3//BRCA1//PDX1//LARS//S100A9
GO:0008654	phospholipid biosynthetic process	Biological process	6	287	128	17653	2.88322	0.0182894	0.320443	1.7378	0.046875	SELENOI//PEMT//SLC44A5//FGF19//FAR1//ADGRF5
GO:0002824	positive regulation of adaptive immune response based on somatic recombination of immune receptors built from immunoglobulin superfamily domains	Biological process	3	77	128	17653	5.37328	0.0184536	0.321553	1.73392	0.0234375	TRAF2//RIPK2//TFRC
GO:0042278	purine nucleoside metabolic process	Biological process	3	77	128	17653	5.37328	0.0184536	0.321553	1.73392	0.0234375	NME1//MOCOS//PEMT
GO:0009267	cellular response to starvation	Biological process	4	139	128	17653	3.96875	0.0185423	0.321553	1.73184	0.03125	LARS//INHBB//SRD5A1//SREBF2
GO:0003203	endocardial cushion morphogenesis	Biological process	2	29	128	17653	9.51131	0.018638	0.321553	1.7296	0.015625	MSX1//NOTCH1
GO:0032743	positive regulation of interleukin-2 production	Biological process	2	29	128	17653	9.51131	0.018638	0.321553	1.7296	0.015625	TRAF2//RIPK2
GO:0035774	positive regulation of insulin secretion involved in cellular response to glucose stimulus	Biological process	2	29	128	17653	9.51131	0.018638	0.321553	1.7296	0.015625	PDX1//VSNL1
GO:0061008	hepaticobiliary system development	Biological process	4	140	128	17653	3.9404	0.0189835	0.325851	1.72162	0.03125	PDX1//NOTCH1//SRD5A1//CLDN1
GO:0070665	positive regulation of leukocyte proliferation	Biological process	4	140	128	17653	3.9404	0.0189835	0.325851	1.72162	0.03125	SLC39A10//TFRC//RIPK2//SHH
GO:0001570	vasculogenesis	Biological process	3	78	128	17653	5.30439	0.0190922	0.326888	1.71914	0.0234375	NOTCH1//RASA1//SHH
GO:0097193	intrinsic apoptotic signaling pathway	Biological process	6	290	128	17653	2.85339	0.019143	0.32693	1.71799	0.046875	BRCA1//BRCA2//TRAF2//PDX1//MSX1//S100A9
GO:0055076	transition metal ion homeostasis	Biological process	4	141	128	17653	3.91246	0.0194311	0.331014	1.7115	0.03125	FLVCR1//TFRC//SLC39A10//S100A9
GO:0007099	centriole replication	Biological process	2	30	128	17653	9.19427	0.0198757	0.335211	1.70168	0.015625	BRCA1//CEP72
GO:0031297	replication fork processing	Biological process	2	30	128	17653	9.19427	0.0198757	0.335211	1.70168	0.015625	BRCA2//RFWD3
GO:0032435	negative regulation of proteasomal ubiquitin-dependent protein catabolic process	Biological process	2	30	128	17653	9.19427	0.0198757	0.335211	1.70168	0.015625	HSP90AB1//SHH
GO:0048730	epidermis morphogenesis	Biological process	2	30	128	17653	9.19427	0.0198757	0.335211	1.70168	0.015625	NOTCH1//SHH
GO:0010033	response to organic substance	Biological process	33	3218	128	17653	1.41428	0.0207839	0.347973	1.68227	0.257812	RIPK2//HSP90AB1//RFC3//FGF19//NCOA6//ME1//PPARG//TRAF2//NME1//DKK3//LARS//CRB2//MSX1//NOTCH1//BRCA1//SRD5A1//CLDN1//INHBB//CCNA2//PDX1//VSNL1//APLN//PEMT//GLB1//TESC//WNT11//IBSP//SREBF2//LY6G6D//IL17C//TFRC//LRCH1//S100P
GO:2001056	positive regulation of cysteine-type endopeptidase activity	Biological process	4	144	128	17653	3.83095	0.020813	0.347973	1.68167	0.03125	PPARG//S100A9//TRAF2//RIPK2
GO:0040007	growth	Biological process	13	954	128	17653	1.87933	0.0210771	0.347973	1.67619	0.101562	WISP1//BRCA2//GINS1//NOTCH1//WNT11//S100A9//DCBLD2//MSX1//PPARG//NDRG3//FLVCR1//ASPM//SHH
GO:0002821	positive regulation of adaptive immune response	Biological process	3	81	128	17653	5.10793	0.0210812	0.347973	1.6761	0.0234375	TRAF2//RIPK2//TFRC
GO:0070542	response to fatty acid	Biological process	3	81	128	17653	5.10793	0.0210812	0.347973	1.6761	0.0234375	PPARG//NME1//CLDN1
GO:0003401	axis elongation	Biological process	2	31	128	17653	8.89768	0.021147	0.347973	1.67475	0.015625	WNT11//SHH
GO:0007094	mitotic spindle assembly checkpoint	Biological process	2	31	128	17653	8.89768	0.021147	0.347973	1.67475	0.015625	MAD2L1//TRIP13
GO:0010922	positive regulation of phosphatase activity	Biological process	2	31	128	17653	8.89768	0.021147	0.347973	1.67475	0.015625	HSP90AB1//SLC39A10
GO:0071173	spindle assembly checkpoint	Biological process	2	31	128	17653	8.89768	0.021147	0.347973	1.67475	0.015625	MAD2L1//TRIP13
GO:0071174	mitotic spindle checkpoint	Biological process	2	31	128	17653	8.89768	0.021147	0.347973	1.67475	0.015625	MAD2L1//TRIP13
GO:0055123	digestive system development	Biological process	4	145	128	17653	3.80453	0.0212867	0.348876	1.67189	0.03125	NOTCH1//SHH//PDX1//WNT11
GO:0033500	carbohydrate homeostasis	Biological process	5	218	128	17653	3.16317	0.0213724	0.348876	1.67015	0.0390625	PDX1//VSNL1//ADGRF5//PPARG//NME1
GO:0042593	glucose homeostasis	Biological process	5	218	128	17653	3.16317	0.0213724	0.348876	1.67015	0.0390625	PDX1//VSNL1//NME1//ADGRF5//PPARG
GO:0045055	regulated exocytosis	Biological process	11	755	128	17653	2.00934	0.0214082	0.348876	1.66942	0.0859375	C2CD4A//OLFM4//ADGRG3//B4GALT1//GLB1//HSP90AB1//S100A9//S100A11//S100P//TCN1//NOTCH1
GO:0006334	nucleosome assembly	Biological process	4	146	128	17653	3.77847	0.021767	0.352202	1.6622	0.03125	CHAF1A//HIRA//CENPN//HIST1H2BL
GO:0032465	regulation of cytokinesis	Biological process	3	82	128	17653	5.04564	0.0217685	0.352202	1.66217	0.0234375	TAS2R13//KIF20B//BRCA2
GO:0045833	negative regulation of lipid metabolic process	Biological process	3	82	128	17653	5.04564	0.0217685	0.352202	1.66217	0.0234375	DKK3//BRCA1//FGF19
GO:0044772	mitotic cell cycle phase transition	Biological process	9	565	128	17653	2.19686	0.0219053	0.353569	1.65945	0.0703125	CEP72//CCNA2//MAD2L1//TRIP13//ANLN//TPX2//RFWD3//BRCA1//CCND2
GO:0035556	intracellular signal transduction	Biological process	30	2871	128	17653	1.44111	0.02203	0.354736	1.65698	0.234375	RASA1//RIPK2//NRG2//FGF19//MAP3K20//DUSP4//BRCA1//BRCA2//SHH//TRAF2//PDX1//CHML//RAP1GDS1//CCNA2//C15ORF62//FAM83D//MCF2L//TMED4//INHBB//MSX1//NOTCH1//WNT11//ADGRG3//DNA2//TPX2//RFC3//LARS//S100A9//GNB1L//WSB2
GO:0051054	positive regulation of DNA metabolic process	Biological process	5	220	128	17653	3.13441	0.0221292	0.355487	1.65503	0.0390625	BRCA1//DNA2//TFRC//HSP90AB1//RFC3
GO:0016573	histone acetylation	Biological process	4	147	128	17653	3.75276	0.0222539	0.355858	1.65259	0.03125	BRCA1//WDR5//YEATS2//BRCA2
GO:1901698	response to nitrogen compound	Biological process	14	1065	128	17653	1.81295	0.0223035	0.355858	1.65163	0.109375	NME1//LARS//PPARG//NOTCH1//INHBB//SRD5A1//CCNA2//HSP90AB1//PEMT//RIPK2//SREBF2//BRCA1//TRAF2//LY6G6D
GO:0045841	negative regulation of mitotic metaphase/anaphase transition	Biological process	2	32	128	17653	8.61963	0.0224512	0.355858	1.64876	0.015625	MAD2L1//TRIP13
GO:0046039	GTP metabolic process	Biological process	2	32	128	17653	8.61963	0.0224512	0.355858	1.64876	0.015625	NME1//MOCOS
GO:0060317	cardiac epithelial to mesenchymal transition	Biological process	2	32	128	17653	8.61963	0.0224512	0.355858	1.64876	0.015625	MSX1//NOTCH1
GO:1903955	positive regulation of protein targeting to mitochondrion	Biological process	3	83	128	17653	4.98485	0.022468	0.355858	1.64844	0.0234375	PEMT//SREBF2//SELENOI
GO:0051641	cellular localization	Biological process	29	2761	128	17653	1.44857	0.0229389	0.362466	1.63943	0.226562	RPS14//LARS//CHML//TMED4//C2CD4A//GRPEL2//DNAJC15//HSP90AB1//CEP72//WNT11//MSX1//SHH//KIF20B//PDX1//VSNL1//NUSAP1//ZIC1//FAM83D//ASPM//BRCA2//SLC35D3//ESCO2//TESC//NKD2//CDH3//PEMT//SREBF2//SELENOI//ANLN
GO:0051781	positive regulation of cell division	Biological process	3	84	128	17653	4.9255	0.0231797	0.365418	1.63489	0.0234375	TAS2R13//KIF20B//SHH
GO:0071695	anatomical structure maturation	Biological process	4	149	128	17653	3.70239	0.0232476	0.365636	1.63362	0.03125	BRCA2//TRIP13//FLVCR1//CDH3
GO:0003006	developmental process involved in reproduction	Biological process	10	669	128	17653	2.0615	0.0237624	0.367546	1.62411	0.078125	INHBB//BRCA2//TRIP13//HSP90AB1//PPARG//SRD5A1//ASPM//SHH//B4GALT1//NOTCH1
GO:0031111	negative regulation of microtubule polymerization or depolymerization	Biological process	2	33	128	17653	8.35843	0.0237878	0.367546	1.62365	0.015625	CAMSAP1//CKAP2
GO:0035115	embryonic forelimb morphogenesis	Biological process	2	33	128	17653	8.35843	0.0237878	0.367546	1.62365	0.015625	MSX1//SHH
GO:0098534	centriole assembly	Biological process	2	33	128	17653	8.35843	0.0237878	0.367546	1.62365	0.015625	CEP72//BRCA1
GO:1901976	regulation of cell cycle checkpoint	Biological process	2	33	128	17653	8.35843	0.0237878	0.367546	1.62365	0.015625	MAD2L1//RFWD3
GO:1902100	negative regulation of metaphase/anaphase transition of cell cycle	Biological process	2	33	128	17653	8.35843	0.0237878	0.367546	1.62365	0.015625	MAD2L1//TRIP13
GO:1902742	apoptotic process involved in development	Biological process	2	33	128	17653	8.35843	0.0237878	0.367546	1.62365	0.015625	B4GALT1//NOTCH1
GO:0030301	cholesterol transport	Biological process	3	85	128	17653	4.86756	0.0239035	0.367546	1.62154	0.0234375	PPARG//SHH//SREBF2
GO:0042475	odontogenesis of dentin-containing tooth	Biological process	3	85	128	17653	4.86756	0.0239035	0.367546	1.62154	0.0234375	MSX1//SHH//ROGDI
GO:0048545	response to steroid hormone	Biological process	7	391	128	17653	2.46905	0.0239125	0.367546	1.62138	0.0546875	NCOA6//BRCA1//NOTCH1//PPARG//GLB1//CLDN1//SRD5A1
GO:0072358	cardiovascular system development	Biological process	11	769	128	17653	1.97276	0.0241103	0.369747	1.6178	0.0859375	TGFBI//APLN//FLVCR1//SHH//RASA1//NOTCH1//PPARG//BRCA1//WNT11//B4GALT1//CRB2
GO:0032874	positive regulation of stress-activated MAPK cascade	Biological process	4	151	128	17653	3.65335	0.024268	0.371322	1.61497	0.03125	MAP3K20//TRAF2//RIPK2//FGF19
GO:0002790	peptide secretion	Biological process	9	576	128	17653	2.15491	0.0244306	0.372004	1.61207	0.0703125	S100A9//PDX1//VSNL1//INHBB//RHBDF2//RIPK2//TRAF2//APLN//NOTCH1
GO:0006886	intracellular protein transport	Biological process	14	1078	128	17653	1.79109	0.0244422	0.372004	1.61186	0.109375	RPS14//LARS//GRPEL2//DNAJC15//HSP90AB1//SHH//ZIC1//SLC35D3//KIF20B//PEMT//SREBF2//SELENOI//CHML//TMED4
GO:0071496	cellular response to external stimulus	Biological process	6	307	128	17653	2.69539	0.0244986	0.372004	1.61086	0.046875	INHBB//SRD5A1//SREBF2//WNT11//LARS//PPARG
GO:0007166	cell surface receptor signaling pathway	Biological process	31	3016	128	17653	1.41755	0.0245325	0.372004	1.61026	0.242188	RIPK2//NOTCH1//WNT11//DKK3//NKD2//WISP1//CASS4//SHH//ITGA9//FGF19//ZIC1//TRAF2//INHBB//HSP90AB1//CRB2//MSX1//NRG2//APLN//RHBDF2//CDH3//MAGEA1//RASA1//SLC39A10//PPARG//BICC1//ASPM//IL17C//BRCA1//ADGRG4//ADGRF5//ADGRG3
GO:0018393	internal peptidyl-lysine acetylation	Biological process	4	152	128	17653	3.62932	0.0247882	0.374202	1.60576	0.03125	BRCA1//WDR5//YEATS2//BRCA2
GO:0070304	positive regulation of stress-activated protein kinase signaling cascade	Biological process	4	152	128	17653	3.62932	0.0247882	0.374202	1.60576	0.03125	MAP3K20//TRAF2//RIPK2//FGF19
GO:0062012	regulation of small molecule metabolic process	Biological process	8	485	128	17653	2.27487	0.0250344	0.374741	1.60146	0.0625	DKK3//WDR5//SCD//SREBF2//BRCA1//PPARG//FGF19//ME1
GO:0043062	extracellular structure organization	Biological process	7	395	128	17653	2.44405	0.0250984	0.374741	1.60035	0.0546875	COL9A1//VCAN//B4GALT1//IBSP//ITGA9//TGFBI//NOTCH1
GO:0003156	regulation of animal organ formation	Biological process	2	34	128	17653	8.11259	0.0251564	0.374741	1.59935	0.015625	NOTCH1//SHH
GO:0030261	chromosome condensation	Biological process	2	34	128	17653	8.11259	0.0251564	0.374741	1.59935	0.015625	NUSAP1//NCAPG
GO:0031577	spindle checkpoint	Biological process	2	34	128	17653	8.11259	0.0251564	0.374741	1.59935	0.015625	MAD2L1//TRIP13
GO:0042339	keratan sulfate metabolic process	Biological process	2	34	128	17653	8.11259	0.0251564	0.374741	1.59935	0.015625	B4GALT1//GLB1
GO:0032092	positive regulation of protein binding	Biological process	3	87	128	17653	4.75566	0.0253877	0.376528	1.59538	0.0234375	TRAF2//HSP90AB1//RIPK2
GO:0060021	roof of mouth development	Biological process	3	87	128	17653	4.75566	0.0253877	0.376528	1.59538	0.0234375	MSX1//SHH//WNT11
GO:0001558	regulation of cell growth	Biological process	7	397	128	17653	2.43173	0.0257063	0.380419	1.58996	0.0546875	S100A9//DCBLD2//MSX1//PPARG//NDRG3//WNT11//WISP1
GO:0044093	positive regulation of molecular function	Biological process	20	1742	128	17653	1.5834	0.0258829	0.381482	1.58699	0.15625	MAP3K20//RIPK2//PPARG//S100A9//TRAF2//SHH//HSP90AB1//TPX2//WNT11//TESC//CDH3//CHML//LARS//RAP1GDS1//RASA1//C15ORF62//NME1//CCND2//RFC3//SLC39A10
GO:0008202	steroid metabolic process	Biological process	6	311	128	17653	2.66072	0.0258909	0.381482	1.58685	0.046875	SRD5A1//SREBF2//SHH//DKK3//SCD//FGF19
GO:0001942	hair follicle development	Biological process	3	88	128	17653	4.70162	0.026148	0.384432	1.58256	0.0234375	NOTCH1//SHH//CDH3
GO:0006656	phosphatidylcholine biosynthetic process	Biological process	2	35	128	17653	7.8808	0.0265563	0.385409	1.57583	0.015625	PEMT//SLC44A5
GO:0010165	response to X-ray	Biological process	2	35	128	17653	7.8808	0.0265563	0.385409	1.57583	0.015625	CCND2//BRCA2
GO:0032369	negative regulation of lipid transport	Biological process	2	35	128	17653	7.8808	0.0265563	0.385409	1.57583	0.015625	SHH//SREBF2
GO:0051180	vitamin transport	Biological process	2	35	128	17653	7.8808	0.0265563	0.385409	1.57583	0.015625	SLC19A2//TCN1
GO:0071392	cellular response to estradiol stimulus	Biological process	2	35	128	17653	7.8808	0.0265563	0.385409	1.57583	0.015625	SRD5A1//CCNA2
GO:2000816	negative regulation of mitotic sister chromatid separation	Biological process	2	35	128	17653	7.8808	0.0265563	0.385409	1.57583	0.015625	MAD2L1//TRIP13
GO:0043085	positive regulation of catalytic activity	Biological process	17	1414	128	17653	1.65809	0.0266998	0.386661	1.57349	0.132812	MAP3K20//RIPK2//PPARG//S100A9//TRAF2//TPX2//WNT11//HSP90AB1//CDH3//CHML//LARS//RAP1GDS1//RASA1//C15ORF62//CCND2//RFC3//SLC39A10
GO:0030510	regulation of BMP signaling pathway	Biological process	3	89	128	17653	4.64879	0.0269204	0.388194	1.56992	0.0234375	CRB2//MSX1//NOTCH1
GO:0048709	oligodendrocyte differentiation	Biological process	3	89	128	17653	4.64879	0.0269204	0.388194	1.56992	0.0234375	SHH//PPARG//NOTCH1
GO:0042180	cellular ketone metabolic process	Biological process	5	232	128	17653	2.97229	0.0270366	0.38904	1.56805	0.0390625	DKK3//SRD5A1//BRCA1//PPARG//FGF19
GO:0043543	protein acylation	Biological process	5	233	128	17653	2.95953	0.0274744	0.394461	1.56107	0.0390625	ESCO2//BRCA1//WDR5//YEATS2//BRCA2
GO:0022404	molting cycle process	Biological process	3	90	128	17653	4.59714	0.027705	0.394461	1.55744	0.0234375	CDH3//NOTCH1//SHH
GO:0022405	hair cycle process	Biological process	3	90	128	17653	4.59714	0.027705	0.394461	1.55744	0.0234375	NOTCH1//SHH//CDH3
GO:0060840	artery development	Biological process	3	90	128	17653	4.59714	0.027705	0.394461	1.55744	0.0234375	WNT11//NOTCH1//SHH
GO:0098773	skin epidermis development	Biological process	3	90	128	17653	4.59714	0.027705	0.394461	1.55744	0.0234375	NOTCH1//SHH//CDH3
GO:0010464	regulation of mesenchymal cell proliferation	Biological process	2	36	128	17653	7.66189	0.0279872	0.395151	1.55304	0.015625	SHH//WNT11
GO:0045005	DNA-dependent DNA replication maintenance of fidelity	Biological process	2	36	128	17653	7.66189	0.0279872	0.395151	1.55304	0.015625	RFWD3//BRCA2
GO:0060323	head morphogenesis	Biological process	2	36	128	17653	7.66189	0.0279872	0.395151	1.55304	0.015625	MSX1//FLVCR1
GO:1905819	negative regulation of chromosome separation	Biological process	2	36	128	17653	7.66189	0.0279872	0.395151	1.55304	0.015625	MAD2L1//TRIP13
GO:0006475	internal protein amino acid acetylation	Biological process	4	158	128	17653	3.4915	0.028051	0.395226	1.55205	0.03125	BRCA1//WDR5//YEATS2//BRCA2
GO:0006767	water-soluble vitamin metabolic process	Biological process	3	91	128	17653	4.54662	0.0285017	0.398901	1.54513	0.0234375	TCN1//SLC19A2//MTHFD2
GO:0006919	activation of cysteine-type endopeptidase activity involved in apoptotic process	Biological process	3	91	128	17653	4.54662	0.0285017	0.398901	1.54513	0.0234375	PPARG//S100A9//TRAF2
GO:0097327	response to antineoplastic agent	Biological process	3	91	128	17653	4.54662	0.0285017	0.398901	1.54513	0.0234375	CLDN1//SRD5A1//BRCA1
GO:0000723	telomere maintenance	Biological process	4	159	128	17653	3.46954	0.0286185	0.398901	1.54335	0.03125	BRCA2//HSP90AB1//DNA2//RFC3
GO:0018394	peptidyl-lysine acetylation	Biological process	4	159	128	17653	3.46954	0.0286185	0.398901	1.54335	0.03125	BRCA1//WDR5//YEATS2//BRCA2
GO:0070887	cellular response to chemical stimulus	Biological process	32	3175	128	17653	1.39	0.0286657	0.398901	1.54264	0.25	RIPK2//HSP90AB1//FGF19//PPARG//TRAF2//DKK3//LARS//CRB2//MSX1//NOTCH1//NCOA6//BRCA1//ITGA9//S100A9//INHBB//SRD5A1//NME1//TFRC//PDX1//VSNL1//CCNA2//APLN//SAA2//ELOC//CLDN1//SHH//TESC//WNT11//IBSP//LY6G6D//IL17C//LRCH1
GO:0022607	cellular component assembly	Biological process	30	2934	128	17653	1.41016	0.0288132	0.400131	1.54041	0.234375	RPS14//ANLN//CHAF1A//HIST1H2BL//PLS3//HIRA//HSP90AB1//CDH3//CEP72//TRIP13//WDR5//POC1B//NOTCH1//RASA1//C15ORF62//RAP1GDS1//CAMSAP1//HELLS//CENPN//TRAF2//OLFM4//B4GALT1//LY6G6D//CLDN1//BRCA1//ME1//WNT11//ASPM//TPX2//DNA2
GO:0031960	response to corticosteroid	Biological process	4	160	128	17653	3.44785	0.0291928	0.400723	1.53472	0.03125	GLB1//CLDN1//SRD5A1//NOTCH1
GO:0021537	telencephalon development	Biological process	5	237	128	17653	2.90958	0.0292707	0.400723	1.53357	0.0390625	NME1//SRD5A1//SHH//ASPM//IGF2BP1
GO:0031668	cellular response to extracellular stimulus	Biological process	5	237	128	17653	2.90958	0.0292707	0.400723	1.53357	0.0390625	INHBB//SRD5A1//SREBF2//LARS//PPARG
GO:0015918	sterol transport	Biological process	3	92	128	17653	4.4972	0.0293106	0.400723	1.53298	0.0234375	PPARG//SHH//SREBF2
GO:0072080	nephron tubule development	Biological process	3	92	128	17653	4.4972	0.0293106	0.400723	1.53298	0.0234375	SHH//WNT11//NOTCH1
GO:0090277	positive regulation of peptide hormone secretion	Biological process	3	92	128	17653	4.4972	0.0293106	0.400723	1.53298	0.0234375	PDX1//VSNL1//APLN
GO:0072359	circulatory system development	Biological process	14	1105	128	17653	1.74733	0.0293715	0.400723	1.53207	0.109375	TGFBI//APLN//FLVCR1//SHH//RASA1//NOTCH1//WNT11//MSX1//NCOA6//PPARG//BICC1//BRCA1//B4GALT1//CRB2
GO:0008207	C21-steroid hormone metabolic process	Biological process	2	37	128	17653	7.45481	0.0294483	0.400723	1.53094	0.015625	DKK3//SRD5A1
GO:0032467	positive regulation of cytokinesis	Biological process	2	37	128	17653	7.45481	0.0294483	0.400723	1.53094	0.015625	KIF20B//TAS2R13
GO:0051154	negative regulation of striated muscle cell differentiation	Biological process	2	37	128	17653	7.45481	0.0294483	0.400723	1.53094	0.015625	NOTCH1//MSX1
GO:0006629	lipid metabolic process	Biological process	17	1433	128	17653	1.63611	0.0298545	0.405434	1.52499	0.132812	BRCA1//SCD//SELENOI//PEMT//SLC44A5//GLB1//SRD5A1//SREBF2//SHH//FAR1//NCOA6//ME1//PPARG//DKK3//FGF19//NRG2//ADGRF5
GO:1903214	regulation of protein targeting to mitochondrion	Biological process	3	93	128	17653	4.44884	0.0301315	0.408375	1.52098	0.0234375	PEMT//SREBF2//SELENOI
GO:0033993	response to lipid	Biological process	12	900	128	17653	1.83885	0.0303842	0.410316	1.51735	0.09375	NCOA6//BRCA1//RIPK2//NOTCH1//CLDN1//PPARG//NME1//GLB1//TESC//WNT11//SRD5A1//CCNA2
GO:0010720	positive regulation of cell development	Biological process	8	504	128	17653	2.18911	0.0304959	0.410316	1.51576	0.0625	ASPM//NOTCH1//SHH//NME1//S100A9//PPARG//OLFM4//KIF20B
GO:1901617	organic hydroxy compound biosynthetic process	Biological process	5	240	128	17653	2.87321	0.0306657	0.410316	1.51335	0.0390625	DKK3//SCD//SREBF2//CDH3//FGF19
GO:0006882	cellular zinc ion homeostasis	Biological process	2	38	128	17653	7.25863	0.0309394	0.410316	1.50949	0.015625	S100A9//SLC39A10
GO:0033048	negative regulation of mitotic sister chromatid segregation	Biological process	2	38	128	17653	7.25863	0.0309394	0.410316	1.50949	0.015625	MAD2L1//TRIP13
GO:0035307	positive regulation of protein dephosphorylation	Biological process	2	38	128	17653	7.25863	0.0309394	0.410316	1.50949	0.015625	HSP90AB1//SLC39A10
GO:0046676	negative regulation of insulin secretion	Biological process	2	38	128	17653	7.25863	0.0309394	0.410316	1.50949	0.015625	INHBB//VSNL1
GO:0061614	pri-miRNA transcription by RNA polymerase II	Biological process	2	38	128	17653	7.25863	0.0309394	0.410316	1.50949	0.015625	APLN//PPARG
GO:1902042	negative regulation of extrinsic apoptotic signaling pathway via death domain receptors	Biological process	2	38	128	17653	7.25863	0.0309394	0.410316	1.50949	0.015625	BRCA1//TRAF2
GO:0021543	pallium development	Biological process	4	163	128	17653	3.38439	0.0309568	0.410316	1.50924	0.03125	NME1//SRD5A1//ASPM//IGF2BP1
GO:0061326	renal tubule development	Biological process	3	94	128	17653	4.40151	0.0309645	0.410316	1.50914	0.0234375	SHH//WNT11//NOTCH1
GO:0051130	positive regulation of cellular component organization	Biological process	15	1221	128	17653	1.69428	0.0310655	0.410316	1.50772	0.117188	NME1//S100A9//C15ORF62//BRCA1//NUSAP1//WNT11//PPARG//MSX1//OLFM4//CLDN1//PEMT//SREBF2//SELENOI//APLN//ANLN
GO:0051493	regulation of cytoskeleton organization	Biological process	8	506	128	17653	2.18046	0.031115	0.410316	1.50703	0.0625	CAMSAP1//CKAP2//RASA1//C15ORF62//BRCA1//WNT11//TPX2//S100A9
GO:0090407	organophosphate biosynthetic process	Biological process	10	700	128	17653	1.9702	0.0311241	0.410316	1.5069	0.078125	NME1//PAICS//SELENOI//PEMT//SLC44A5//ME1//MOCOS//FGF19//FAR1//ADGRF5
GO:0045321	leukocyte activation	Biological process	15	1222	128	17653	1.69289	0.03126	0.411306	1.50501	0.117188	ADGRG3//SLC39A10//TFRC//SHH//RIPK2//ADGRF5//OLFM4//B4GALT1//GLB1//HSP90AB1//S100A9//S100A11//S100P//TCN1//HELLS
GO:1901360	organic cyclic compound metabolic process	Biological process	57	6394	128	17653	1.22945	0.0318756	0.418591	1.49654	0.445312	CHAF1A//DNA2//NCOA6//RFC3//BRCA1//PDX1//MAGEA1//MSX1//NOTCH1//PPARG//YEATS2//RPS14//SHH//SREBF2//BRCA2//RFWD3//NRF1//ELOC//ZIC1//TRIP13//NME1//PAICS//GINS1//ESCO2//EEPD1//HELLS//WDR5//HIRA//LARS//CARNMT1//SRD5A1//ME1//TCN1//MOCOS//HSP90AB1//S100A11//IGF2BP1//TESC//WNT11//CCNA2//DKK3//CRB2//ADGRG3//SLC19A2//SCD//TFRC//DDN//CKAP2//RIPK2//PEMT//MTHFD2//CDH3//TRAF2//S100A9//RASA1//FGF19//APLN
GO:0046474	glycerophospholipid biosynthetic process	Biological process	5	243	128	17653	2.83774	0.032102	0.420748	1.49347	0.0390625	SELENOI//PEMT//SLC44A5//FGF19//FAR1
GO:0048469	cell maturation	Biological process	4	165	128	17653	3.34337	0.0321671	0.420786	1.49259	0.03125	BRCA2//TRIP13//FLVCR1//PPARG
GO:0006839	mitochondrial transport	Biological process	6	328	128	17653	2.52282	0.0323951	0.421354	1.48952	0.046875	GRPEL2//DNAJC15//PEMT//SREBF2//SELENOI//FLVCR1
GO:0003197	endocardial cushion development	Biological process	2	39	128	17653	7.07252	0.0324597	0.421354	1.48865	0.015625	MSX1//NOTCH1
GO:0008156	negative regulation of DNA replication	Biological process	2	39	128	17653	7.07252	0.0324597	0.421354	1.48865	0.015625	BRCA2//S100A11
GO:0046638	positive regulation of alpha-beta T cell differentiation	Biological process	2	39	128	17653	7.07252	0.0324597	0.421354	1.48865	0.015625	RIPK2//SHH
GO:0042102	positive regulation of T cell proliferation	Biological process	3	96	128	17653	4.30981	0.0326665	0.423073	1.4859	0.0234375	RIPK2//SHH//TFRC
GO:0001816	cytokine production	Biological process	10	706	128	17653	1.95346	0.0327173	0.423073	1.48522	0.078125	TRAF2//BRCA1//S100A9//RIPK2//CDH3//WNT11//IGF2BP1//INHBB//NOTCH1//HSP90AB1
GO:0010565	regulation of cellular ketone metabolic process	Biological process	4	166	128	17653	3.32323	0.0327826	0.423108	1.48436	0.03125	DKK3//BRCA1//PPARG//FGF19
GO:0006605	protein targeting	Biological process	7	419	128	17653	2.30405	0.0330703	0.425356	1.48056	0.0546875	RPS14//LARS//GRPEL2//DNAJC15//PEMT//SREBF2//SELENOI
GO:0051091	positive regulation of DNA binding transcription factor activity	Biological process	5	245	128	17653	2.81457	0.0330826	0.425356	1.4804	0.0390625	SHH//S100A9//TRAF2//RIPK2//PPARG
GO:0007019	microtubule depolymerization	Biological process	2	40	128	17653	6.8957	0.034009	0.430716	1.46841	0.015625	CAMSAP1//CKAP2
GO:0017145	stem cell division	Biological process	2	40	128	17653	6.8957	0.034009	0.430716	1.46841	0.015625	ASPM//NOTCH1
GO:0033046	negative regulation of sister chromatid segregation	Biological process	2	40	128	17653	6.8957	0.034009	0.430716	1.46841	0.015625	MAD2L1//TRIP13
GO:0035337	fatty-acyl-CoA metabolic process	Biological process	2	40	128	17653	6.8957	0.034009	0.430716	1.46841	0.015625	FAR1//SCD
GO:0044743	protein transmembrane import into intracellular organelle	Biological process	2	40	128	17653	6.8957	0.034009	0.430716	1.46841	0.015625	GRPEL2//DNAJC15
GO:0051653	spindle localization	Biological process	2	40	128	17653	6.8957	0.034009	0.430716	1.46841	0.015625	NUSAP1//ASPM
GO:0055069	zinc ion homeostasis	Biological process	2	40	128	17653	6.8957	0.034009	0.430716	1.46841	0.015625	SLC39A10//S100A9
GO:0060412	ventricular septum morphogenesis	Biological process	2	40	128	17653	6.8957	0.034009	0.430716	1.46841	0.015625	NOTCH1//WNT11
GO:0045934	negative regulation of nucleobase-containing compound metabolic process	Biological process	17	1457	128	17653	1.60916	0.0342306	0.432713	1.46559	0.132812	PDX1//MAGEA1//MSX1//NOTCH1//PPARG//YEATS2//RPS14//SHH//SREBF2//HELLS//S100A11//DKK3//BRCA1//WNT11//HIRA//BRCA2//IGF2BP1
GO:0044281	small molecule metabolic process	Biological process	23	2144	128	17653	1.47949	0.0345128	0.435018	1.46202	0.179688	PDX1//B4GALT1//ME1//NME1//PAICS//LARS//CARNMT1//BRCA1//SCD//MTHFD2//TCN1//SREBF2//FAR1//GLB1//PPARG//VCAN//MOCOS//DKK3//WDR5//SRD5A1//SLC19A2//PEMT//FGF19
GO:0031570	DNA integrity checkpoint	Biological process	4	169	128	17653	3.26424	0.0346702	0.435018	1.46004	0.03125	DNA2//MAP3K20//RFWD3//BRCA1
GO:0046328	regulation of JNK cascade	Biological process	4	169	128	17653	3.26424	0.0346702	0.435018	1.46004	0.03125	MAP3K20//TRAF2//RIPK2//FGF19
GO:0070507	regulation of microtubule cytoskeleton organization	Biological process	4	169	128	17653	3.26424	0.0346702	0.435018	1.46004	0.03125	CAMSAP1//CKAP2//BRCA1//TPX2
GO:2000027	regulation of organ morphogenesis	Biological process	5	249	128	17653	2.76936	0.0350994	0.439588	1.4547	0.0390625	NOTCH1//WNT11//MSX1//SHH//B4GALT1
GO:0035136	forelimb morphogenesis	Biological process	2	41	128	17653	6.72752	0.0355865	0.441147	1.44871	0.015625	MSX1//SHH
GO:0051985	negative regulation of chromosome segregation	Biological process	2	41	128	17653	6.72752	0.0355865	0.441147	1.44871	0.015625	MAD2L1//TRIP13
GO:0101023	vascular endothelial cell proliferation	Biological process	2	41	128	17653	6.72752	0.0355865	0.441147	1.44871	0.015625	PPARG//APLN
GO:1905562	regulation of vascular endothelial cell proliferation	Biological process	2	41	128	17653	6.72752	0.0355865	0.441147	1.44871	0.015625	PPARG//APLN
GO:2000059	negative regulation of ubiquitin-dependent protein catabolic process	Biological process	2	41	128	17653	6.72752	0.0355865	0.441147	1.44871	0.015625	HSP90AB1//SHH
GO:0007050	cell cycle arrest	Biological process	5	250	128	17653	2.75828	0.0356153	0.441147	1.44836	0.0390625	HSP90AB1//BRCA1//NOTCH1//MAP3K20//KIF20B
GO:0010950	positive regulation of endopeptidase activity	Biological process	4	171	128	17653	3.22606	0.0359632	0.444642	1.44414	0.03125	PPARG//S100A9//TRAF2//RIPK2
GO:0001667	ameboidal-type cell migration	Biological process	7	427	128	17653	2.26089	0.0360658	0.445097	1.4429	0.0546875	SHH//PPARG//S100P//CRB2//WNT11//NOTCH1//ANLN
GO:0048568	embryonic organ development	Biological process	7	428	128	17653	2.2556	0.0364525	0.447544	1.43827	0.0546875	NOTCH1//SHH//CRB2//ZIC1//MSX1//WNT11//FLVCR1
GO:0045597	positive regulation of cell differentiation	Biological process	12	926	128	17653	1.78722	0.0366097	0.447544	1.4364	0.09375	ASPM//NOTCH1//SHH//CRB2//NME1//S100A9//TESC//PPARG//RIPK2//OLFM4//KIF20B//HSP90AB1
GO:0001959	regulation of cytokine-mediated signaling pathway	Biological process	4	172	128	17653	3.2073	0.03662	0.447544	1.43628	0.03125	RIPK2//TRAF2//HSP90AB1//PPARG
GO:0032200	telomere organization	Biological process	4	172	128	17653	3.2073	0.03662	0.447544	1.43628	0.03125	BRCA2//DNA2//HSP90AB1//RFC3
GO:1905114	cell surface receptor signaling pathway involved in cell-cell signaling	Biological process	9	620	128	17653	2.00198	0.0366235	0.447544	1.43624	0.0703125	WNT11//DKK3//NKD2//WISP1//SHH//CDH3//NOTCH1//BICC1//ASPM
GO:0065004	protein-DNA complex assembly	Biological process	5	252	128	17653	2.73639	0.0366611	0.447544	1.43579	0.0390625	CHAF1A//HIST1H2BL//HIRA//HELLS//CENPN
GO:0006725	cellular aromatic compound metabolic process	Biological process	55	6178	128	17653	1.22779	0.0369238	0.447695	1.43269	0.429688	CHAF1A//DNA2//NCOA6//RFC3//BRCA1//PDX1//MAGEA1//MSX1//NOTCH1//PPARG//YEATS2//RPS14//SHH//SREBF2//BRCA2//RFWD3//NRF1//ELOC//ZIC1//TRIP13//NME1//PAICS//GINS1//ESCO2//EEPD1//HELLS//WDR5//HIRA//LARS//CARNMT1//ME1//TCN1//HSP90AB1//S100A11//IGF2BP1//TESC//WNT11//CCNA2//DKK3//CRB2//MOCOS//ADGRG3//SRD5A1//SLC19A2//TFRC//DDN//CKAP2//RIPK2//PEMT//MTHFD2//CDH3//TRAF2//S100A9//RASA1//APLN
GO:0046822	regulation of nucleocytoplasmic transport	Biological process	3	101	128	17653	4.09646	0.0371313	0.447695	1.43026	0.0234375	HSP90AB1//SHH//ZIC1
GO:2000278	regulation of DNA biosynthetic process	Biological process	3	101	128	17653	4.09646	0.0371313	0.447695	1.43026	0.0234375	HSP90AB1//PPARG//RFC3
GO:0030890	positive regulation of B cell proliferation	Biological process	2	42	128	17653	6.56734	0.037192	0.447695	1.42955	0.015625	SLC39A10//TFRC
GO:0032924	activin receptor signaling pathway	Biological process	2	42	128	17653	6.56734	0.037192	0.447695	1.42955	0.015625	SHH//INHBB
GO:0033574	response to testosterone	Biological process	2	42	128	17653	6.56734	0.037192	0.447695	1.42955	0.015625	SRD5A1//NME1
GO:0045540	regulation of cholesterol biosynthetic process	Biological process	2	42	128	17653	6.56734	0.037192	0.447695	1.42955	0.015625	SCD//SREBF2
GO:0050769	positive regulation of neurogenesis	Biological process	7	430	128	17653	2.24511	0.0372341	0.447695	1.42906	0.0546875	ASPM//NOTCH1//SHH//NME1//S100A9//PPARG//KIF20B
GO:0044249	cellular biosynthetic process	Biological process	58	6579	128	17653	1.21584	0.0372693	0.447695	1.42865	0.453125	CHAF1A//DNA2//NCOA6//RFC3//BRCA1//PDX1//MAGEA1//MSX1//NOTCH1//PPARG//YEATS2//RPS14//SHH//SREBF2//BRCA2//NRF1//ELOC//ZIC1//TRIP13//B4GALT1//NME1//PAICS//GINS1//ESCO2//HELLS//WDR5//HIRA//S100A9//LARS//LY6G6D//SCD//SELENOI//PEMT//SLC44A5//SRD5A1//ME1//MOCOS//HSP90AB1//S100A11//FAR1//TESC//WNT11//CCNA2//DKK3//IGF2BP1//VCAN//CRB2//RFWD3//ADGRG3//FGF19//DDN//CKAP2//RIPK2//CDH3//INHBB//TRAF2//ADGRF5//AP…
GO:0009967	positive regulation of signal transduction	Biological process	18	1586	128	17653	1.56523	0.0375125	0.449818	1.42582	0.140625	MAP3K20//RIPK2//TRAF2//INHBB//SHH//HSP90AB1//CRB2//MSX1//NOTCH1//TMED4//CDH3//FGF19//SLC39A10//NRG2//WNT11//ASPM//LARS//S100A9
GO:0016477	cell migration	Biological process	17	1474	128	17653	1.5906	0.0376071	0.450153	1.42473	0.132812	SHH//ASPM//S100A9//NOTCH1//ADGRG3//WNT11//ITGA9//PPARG//S100P//B4GALT1//CRB2//SAA2//ANLN//LRCH1//KIF20B//CASS4//FAM83D
GO:0140013	meiotic nuclear division	Biological process	4	174	128	17653	3.17044	0.0379545	0.453509	1.42074	0.03125	TRIP13//BRCA2//ASPM//MSX1
GO:1900180	regulation of protein localization to nucleus	Biological process	3	102	128	17653	4.0563	0.03806	0.453968	1.41953	0.0234375	HSP90AB1//SHH//ZIC1
GO:0021700	developmental maturation	Biological process	5	256	128	17653	2.69363	0.0388092	0.457443	1.41106	0.0390625	BRCA2//TRIP13//FLVCR1//PPARG//CDH3
GO:0010883	regulation of lipid storage	Biological process	2	43	128	17653	6.41461	0.0388248	0.457443	1.41089	0.015625	SREBF2//PPARG
GO:0021983	pituitary gland development	Biological process	2	43	128	17653	6.41461	0.0388248	0.457443	1.41089	0.015625	MSX1//SRD5A1
GO:0034105	positive regulation of tissue remodeling	Biological process	2	43	128	17653	6.41461	0.0388248	0.457443	1.41089	0.015625	TFRC//B4GALT1
GO:0051445	regulation of meiotic cell cycle	Biological process	2	43	128	17653	6.41461	0.0388248	0.457443	1.41089	0.015625	MSX1//ASPM
GO:0071548	response to dexamethasone	Biological process	2	43	128	17653	6.41461	0.0388248	0.457443	1.41089	0.015625	SRD5A1//CLDN1
GO:0090278	negative regulation of peptide hormone secretion	Biological process	2	43	128	17653	6.41461	0.0388248	0.457443	1.41089	0.015625	INHBB//VSNL1
GO:0009119	ribonucleoside metabolic process	Biological process	3	103	128	17653	4.01691	0.0390005	0.458714	1.40893	0.0234375	NME1//MOCOS//PEMT
GO:0034728	nucleosome organization	Biological process	4	176	128	17653	3.13441	0.0393166	0.460829	1.40542	0.03125	CHAF1A//HIST1H2BL//HIRA//CENPN
GO:2001235	positive regulation of apoptotic signaling pathway	Biological process	4	176	128	17653	3.13441	0.0393166	0.460829	1.40542	0.03125	TRAF2//MSX1//S100A9//INHBB
GO:0010243	response to organonitrogen compound	Biological process	12	937	128	17653	1.76624	0.0395002	0.46218	1.4034	0.09375	NME1//LARS//PPARG//NOTCH1//INHBB//SRD5A1//CCNA2//HSP90AB1//PEMT//RIPK2//SREBF2//BRCA1
GO:0050790	regulation of catalytic activity	Biological process	24	2292	128	17653	1.44413	0.0395723	0.462224	1.40261	0.1875	MAP3K20//RIPK2//DUSP4//TESC//PPARG//S100A9//TRAF2//CRB2//LRCH1//TPX2//WNT11//HSP90AB1//CDH3//CHML//LARS//RAP1GDS1//RASA1//C15ORF62//NOTCH1//CCND2//RFC3//SLC39A10//MAD2L1//GRPEL2
GO:0032526	response to retinoic acid	Biological process	3	104	128	17653	3.97829	0.0399528	0.465863	1.39845	0.0234375	PPARG//TESC//WNT11
GO:0002793	positive regulation of peptide secretion	Biological process	5	259	128	17653	2.66243	0.0404699	0.467554	1.39287	0.0390625	PDX1//VSNL1//RIPK2//APLN//S100A9
GO:0032784	regulation of DNA-templated transcription, elongation	Biological process	2	44	128	17653	6.26882	0.0404846	0.467554	1.39271	0.015625	ELOC//SHH
GO:0044060	regulation of endocrine process	Biological process	2	44	128	17653	6.26882	0.0404846	0.467554	1.39271	0.015625	INHBB//APLN
GO:0045197	establishment or maintenance of epithelial cell apical/basal polarity	Biological process	2	44	128	17653	6.26882	0.0404846	0.467554	1.39271	0.015625	CRB2//WNT11
GO:0009653	anatomical structure morphogenesis	Biological process	27	2656	128	17653	1.40199	0.0405658	0.467554	1.39184	0.210938	CDH3//MSX1//TGFBI//APLN//SHH//RASA1//DUSP4//CRB2//KIF20B//NOTCH1//WNT11//HIRA//COL9A1//PDX1//ATP10A//C15ORF62//FJX1//PPARG//CAMSAP1//ZIC1//ROGDI//FLVCR1//MAP3K20//BRCA1//B4GALT1//OLFM4//DKK3
GO:0071310	cellular response to organic substance	Biological process	27	2656	128	17653	1.40199	0.0405658	0.467554	1.39184	0.210938	RIPK2//FGF19//PPARG//TRAF2//DKK3//LARS//HSP90AB1//CRB2//MSX1//NOTCH1//NCOA6//BRCA1//INHBB//SRD5A1//PDX1//VSNL1//CCNA2//APLN//TESC//WNT11//NME1//CLDN1//IBSP//LY6G6D//IL17C//TFRC//LRCH1
GO:0002443	leukocyte mediated immunity	Biological process	11	836	128	17653	1.81466	0.0405817	0.467554	1.39167	0.0859375	TRAF2//OLFM4//ADGRG3//B4GALT1//GLB1//HSP90AB1//S100A9//S100A11//S100P//TCN1//TFRC
GO:0014013	regulation of gliogenesis	Biological process	3	105	128	17653	3.9404	0.0409168	0.470613	1.3881	0.0234375	NOTCH1//PPARG//SHH
GO:0046651	lymphocyte proliferation	Biological process	5	260	128	17653	2.65219	0.041033	0.471148	1.38687	0.0390625	SLC39A10//TFRC//RIPK2//SHH//HELLS
GO:0045786	negative regulation of cell cycle	Biological process	9	634	128	17653	1.95777	0.041253	0.472871	1.38454	0.0703125	DNA2//MAP3K20//NOTCH1//KIF20B//MAD2L1//TRIP13//RFWD3//BRCA1//HSP90AB1
GO:0001568	blood vessel development	Biological process	10	736	128	17653	1.87383	0.0415531	0.475131	1.3814	0.078125	TGFBI//APLN//SHH//RASA1//NOTCH1//PPARG//BRCA1//WNT11//B4GALT1//FLVCR1
GO:0065008	regulation of biological quality	Biological process	36	3770	128	17653	1.31695	0.041779	0.475131	1.37904	0.28125	BRCA2//DNA2//CDH3//POC1B//APLN//SHH//SRD5A1//FLVCR1//TFRC//SLC39A10//HSP90AB1//NME1//PPARG//ATP10A//RASA1//C15ORF62//LARS//IGF2BP1//SREBF2//RAP1GDS1//C2CD4A//INHBB//MSX1//TESC//PDX1//S100A9//RPS14//RFC3//DKK3//VSNL1//ADGRF5//NTS//ASPM//RPTN//CLDN1//SLC35D3
GO:0051098	regulation of binding	Biological process	6	349	128	17653	2.37102	0.0417935	0.475131	1.37889	0.046875	HSP90AB1//RIPK2//NME1//PPARG//TRAF2//MSX1
GO:0060759	regulation of response to cytokine stimulus	Biological process	4	180	128	17653	3.06476	0.0421241	0.475131	1.37547	0.03125	RIPK2//TRAF2//HSP90AB1//PPARG
GO:0071241	cellular response to inorganic substance	Biological process	4	180	128	17653	3.06476	0.0421241	0.475131	1.37547	0.03125	CLDN1//SHH//TRAF2//CCNA2
GO:0043687	post-translational protein modification	Biological process	7	442	128	17653	2.18416	0.0421569	0.475131	1.37513	0.0546875	LY6G6D//ESCO2//WDR5//CHML//VCAN//WSB2//ELOC
GO:0007595	lactation	Biological process	2	45	128	17653	6.12951	0.0421708	0.475131	1.37499	0.015625	NME1//APLN
GO:0031055	chromatin remodeling at centromere	Biological process	2	45	128	17653	6.12951	0.0421708	0.475131	1.37499	0.015625	HELLS//CENPN
GO:0097366	response to bronchodilator	Biological process	2	45	128	17653	6.12951	0.0421708	0.475131	1.37499	0.015625	TRAF2//CCNA2
GO:0032943	mononuclear cell proliferation	Biological process	5	262	128	17653	2.63195	0.0421733	0.475131	1.37496	0.0390625	SLC39A10//TFRC//RIPK2//SHH//HELLS
GO:0000226	microtubule cytoskeleton organization	Biological process	8	538	128	17653	2.05077	0.0422229	0.475131	1.37445	0.0625	CAMSAP1//CKAP2//ASPM//CEP72//BRCA1//NUSAP1//BRCA2//TPX2
GO:1901699	cellular response to nitrogen compound	Biological process	9	637	128	17653	1.94855	0.0422945	0.475146	1.37372	0.0703125	LARS//INHBB//PPARG//SRD5A1//RIPK2//CCNA2//BRCA1//TRAF2//LY6G6D
GO:0006810	transport	Biological process	46	5048	128	17653	1.25674	0.0424925	0.476578	1.37169	0.359375	S100A9//C2CD4A//RPS14//LARS//TCN1//FLVCR1//CHML//TMED4//NKD2//NME1//SHH//APLN//DNAJC15//TESC//RHBDF2//LRRIQ4//SLC44A5//SLC19A2//PPARG//FGF19//INHBB//PDX1//GRPEL2//TFRC//HSP90AB1//SLC35D3//ATP10A//VSNL1//ZIC1//OLFM4//ADGRG3//B4GALT1//GLB1//S100A11//S100P//NOTCH1//RIPK2//TRAF2//IGF2BP1//CLDN1//SLC39A10//SREBF2//KIF20B//CDH3//PEMT//SELENOI
GO:0051046	regulation of secretion	Biological process	10	741	128	17653	1.86119	0.0431713	0.483356	1.3648	0.078125	S100A9//INHBB//C2CD4A//PDX1//VSNL1//NOTCH1//RHBDF2//RIPK2//TRAF2//APLN
GO:0048839	inner ear development	Biological process	4	182	128	17653	3.03108	0.0435694	0.483356	1.36082	0.03125	NOTCH1//ZIC1//CCNA2//SHH
GO:0048870	cell motility	Biological process	18	1615	128	17653	1.53712	0.0435798	0.483356	1.36071	0.140625	SHH//ASPM//S100A9//NOTCH1//CASS4//FAM83D//ADGRG3//WNT11//ITGA9//PPARG//S100P//B4GALT1//CRB2//SAA2//ANLN//NRG2//LRCH1//KIF20B
GO:0051674	localization of cell	Biological process	18	1615	128	17653	1.53712	0.0435798	0.483356	1.36071	0.140625	SHH//ASPM//S100A9//NOTCH1//CASS4//FAM83D//ADGRG3//WNT11//ITGA9//PPARG//S100P//B4GALT1//CRB2//SAA2//ANLN//NRG2//LRCH1//KIF20B
GO:0097435	supramolecular fiber organization	Biological process	9	641	128	17653	1.93639	0.0437107	0.483356	1.35941	0.0703125	PLS3//CAMSAP1//CKAP2//RASA1//C15ORF62//SHH//WNT11//CASS4//HSP90AB1
GO:0043279	response to alkaloid	Biological process	3	108	128	17653	3.83095	0.0438791	0.483356	1.35774	0.0234375	PPARG//HSP90AB1//CCNA2
GO:0001961	positive regulation of cytokine-mediated signaling pathway	Biological process	2	46	128	17653	5.99626	0.0438829	0.483356	1.3577	0.015625	TRAF2//RIPK2
GO:0002067	glandular epithelial cell differentiation	Biological process	2	46	128	17653	5.99626	0.0438829	0.483356	1.3577	0.015625	PDX1//NOTCH1
GO:0048806	genitalia development	Biological process	2	46	128	17653	5.99626	0.0438829	0.483356	1.3577	0.015625	SHH//SRD5A1
GO:0051972	regulation of telomerase activity	Biological process	2	46	128	17653	5.99626	0.0438829	0.483356	1.3577	0.015625	HSP90AB1//PPARG
GO:1902808	positive regulation of cell cycle G1/S phase transition	Biological process	2	46	128	17653	5.99626	0.0438829	0.483356	1.3577	0.015625	CCND2//FAM83D
GO:0010469	regulation of signaling receptor activity	Biological process	8	543	128	17653	2.03188	0.0441694	0.485719	1.35488	0.0625	LY6G6D//IL17C//INHBB//NTS//SHH//APLN//NRG2//FGF19
GO:1903531	negative regulation of secretion by cell	Biological process	4	183	128	17653	3.01452	0.0443024	0.486392	1.35357	0.03125	INHBB//NOTCH1//VSNL1//RHBDF2
GO:0032368	regulation of lipid transport	Biological process	3	109	128	17653	3.7958	0.0448897	0.491245	1.34785	0.0234375	PPARG//SREBF2//SHH
GO:0072009	nephron epithelium development	Biological process	3	109	128	17653	3.7958	0.0448897	0.491245	1.34785	0.0234375	SHH//WNT11//NOTCH1
GO:0031396	regulation of protein ubiquitination	Biological process	4	184	128	17653	2.99813	0.0450424	0.492119	1.34638	0.03125	BRCA1//RIPK2//MAD2L1//HSP90AB1
GO:0007140	male meiotic nuclear division	Biological process	2	47	128	17653	5.86868	0.0456206	0.493645	1.34084	0.015625	BRCA2//TRIP13
GO:0035088	establishment or maintenance of apical/basal cell polarity	Biological process	2	47	128	17653	5.86868	0.0456206	0.493645	1.34084	0.015625	CRB2//WNT11
GO:0060976	coronary vasculature development	Biological process	2	47	128	17653	5.86868	0.0456206	0.493645	1.34084	0.015625	NOTCH1//APLN
GO:0060986	endocrine hormone secretion	Biological process	2	47	128	17653	5.86868	0.0456206	0.493645	1.34084	0.015625	INHBB//APLN
GO:0061245	establishment or maintenance of bipolar cell polarity	Biological process	2	47	128	17653	5.86868	0.0456206	0.493645	1.34084	0.015625	CRB2//WNT11
GO:1901799	negative regulation of proteasomal protein catabolic process	Biological process	2	47	128	17653	5.86868	0.0456206	0.493645	1.34084	0.015625	HSP90AB1//SHH
GO:0045892	negative regulation of transcription, DNA-templated	Biological process	14	1176	128	17653	1.64183	0.0457997	0.493645	1.33914	0.109375	PDX1//MAGEA1//MSX1//NOTCH1//PPARG//YEATS2//RPS14//SHH//SREBF2//HELLS//HIRA//DKK3//BRCA1//WNT11
GO:0000041	transition metal ion transport	Biological process	3	110	128	17653	3.76129	0.045912	0.493645	1.33807	0.0234375	TCN1//TFRC//SLC39A10
GO:0030330	DNA damage response, signal transduction by p53 class mediator	Biological process	3	110	128	17653	3.76129	0.045912	0.493645	1.33807	0.0234375	BRCA1//BRCA2//MSX1
GO:0051153	regulation of striated muscle cell differentiation	Biological process	3	110	128	17653	3.76129	0.045912	0.493645	1.33807	0.0234375	NOTCH1//MSX1//SHH
GO:0002244	hematopoietic progenitor cell differentiation	Biological process	4	186	128	17653	2.96589	0.0465431	0.498845	1.33214	0.03125	SHH//NOTCH1//ESCO2//ANLN
GO:0031099	regeneration	Biological process	4	186	128	17653	2.96589	0.0465431	0.498845	1.33214	0.03125	NOTCH1//PPARG//CCNA2//CLDN1
GO:0009895	negative regulation of catabolic process	Biological process	5	270	128	17653	2.55396	0.0469258	0.500709	1.32859	0.0390625	LARS//HSP90AB1//SHH//MAD2L1//IGF2BP1
GO:0072089	stem cell proliferation	Biological process	3	111	128	17653	3.72741	0.0469457	0.500709	1.3284	0.0234375	ASPM//NOTCH1//SHH
GO:0007507	heart development	Biological process	8	550	128	17653	2.00602	0.046993	0.500709	1.32797	0.0625	NOTCH1//SHH//WNT11//MSX1//APLN//NCOA6//PPARG//BICC1
GO:0030155	regulation of cell adhesion	Biological process	9	650	128	17653	1.90958	0.0470137	0.500709	1.32778	0.0703125	RASA1//TGFBI//NOTCH1//SHH//RIPK2//TESC//TFRC//IBSP//OLFM4
GO:0060348	bone development	Biological process	4	187	128	17653	2.95003	0.0473039	0.500709	1.3251	0.03125	MSX1//TTC9//PLS3//SRD5A1
GO:0010718	positive regulation of epithelial to mesenchymal transition	Biological process	2	48	128	17653	5.74642	0.0473834	0.500709	1.32437	0.015625	CRB2//NOTCH1
GO:0030071	regulation of mitotic metaphase/anaphase transition	Biological process	2	48	128	17653	5.74642	0.0473834	0.500709	1.32437	0.015625	MAD2L1//TRIP13
GO:0033344	cholesterol efflux	Biological process	2	48	128	17653	5.74642	0.0473834	0.500709	1.32437	0.015625	SHH//SREBF2
GO:0045839	negative regulation of mitotic nuclear division	Biological process	2	48	128	17653	5.74642	0.0473834	0.500709	1.32437	0.015625	MAD2L1//TRIP13
GO:1901576	organic substance biosynthetic process	Biological process	58	6665	128	17653	1.20015	0.0477055	0.502492	1.32143	0.453125	CHAF1A//DNA2//NCOA6//RFC3//BRCA1//PDX1//MAGEA1//MSX1//NOTCH1//PPARG//YEATS2//RPS14//SHH//SREBF2//BRCA2//NRF1//ELOC//ZIC1//TRIP13//B4GALT1//NME1//PAICS//GINS1//ESCO2//HELLS//WDR5//HIRA//S100A9//LARS//LY6G6D//SCD//SELENOI//PEMT//SLC44A5//SRD5A1//ME1//MOCOS//HSP90AB1//S100A11//FAR1//TESC//WNT11//CCNA2//DKK3//IGF2BP1//VCAN//CRB2//RFWD3//ADGRG3//FGF19//DDN//CKAP2//RIPK2//CDH3//INHBB//TRAF2//ADGRF5//AP…
GO:0000724	double-strand break repair via homologous recombination	Biological process	3	112	128	17653	3.69413	0.0479909	0.502492	1.31884	0.0234375	RFWD3//BRCA1//BRCA2
GO:0002065	columnar/cuboidal epithelial cell differentiation	Biological process	3	112	128	17653	3.69413	0.0479909	0.502492	1.31884	0.0234375	PDX1//NOTCH1//WNT11
GO:0042303	molting cycle	Biological process	3	112	128	17653	3.69413	0.0479909	0.502492	1.31884	0.0234375	CDH3//NOTCH1//SHH
GO:0042633	hair cycle	Biological process	3	112	128	17653	3.69413	0.0479909	0.502492	1.31884	0.0234375	CDH3//NOTCH1//SHH
GO:0010952	positive regulation of peptidase activity	Biological process	4	188	128	17653	2.93434	0.0480715	0.502492	1.31811	0.03125	PPARG//S100A9//TRAF2//RIPK2
GO:0046483	heterocycle metabolic process	Biological process	54	6136	128	17653	1.21372	0.0480722	0.502492	1.31811	0.421875	CHAF1A//DNA2//NCOA6//RFC3//BRCA1//PDX1//MAGEA1//MSX1//NOTCH1//PPARG//YEATS2//RPS14//SHH//SREBF2//BRCA2//RFWD3//NRF1//ELOC//ZIC1//TRIP13//NME1//PAICS//GINS1//ESCO2//EEPD1//HELLS//WDR5//HIRA//LARS//CARNMT1//ME1//TCN1//MOCOS//HSP90AB1//S100A11//IGF2BP1//TESC//WNT11//CCNA2//DKK3//CRB2//ADGRG3//SRD5A1//SLC19A2//TFRC//DDN//CKAP2//RIPK2//PEMT//MTHFD2//TRAF2//S100A9//RASA1//APLN
GO:0045017	glycerolipid biosynthetic process	Biological process	5	272	128	17653	2.53518	0.0481618	0.502652	1.3173	0.0390625	SELENOI//PEMT//SLC44A5//FGF19//FAR1
GO:0006650	glycerophospholipid metabolic process	Biological process	6	362	128	17653	2.28587	0.0483947	0.504304	1.3152	0.046875	SELENOI//PEMT//SLC44A5//FGF19//FAR1//NRG2
GO:0007548	sex differentiation	Biological process	5	273	128	17653	2.5259	0.048787	0.504616	1.3117	0.0390625	INHBB//ASPM//SRD5A1//BRCA2//SHH
GO:1903046	meiotic cell cycle process	Biological process	4	189	128	17653	2.91882	0.0488461	0.504616	1.31117	0.03125	TRIP13//BRCA2//ASPM//MSX1
GO:0009889	regulation of biosynthetic process	Biological process	43	4707	128	17653	1.25989	0.0489587	0.504616	1.31017	0.335938	PDX1//MAGEA1//MSX1//NOTCH1//PPARG//YEATS2//RPS14//SHH//SREBF2//ESCO2//HELLS//BRCA2//NRF1//BRCA1//ELOC//HIRA//S100A9//S100A11//NCOA6//TESC//WNT11//ZIC1//CCNA2//DKK3//IGF2BP1//CRB2//ADGRG3//WDR5//HSP90AB1//SCD//DNA2//DDN//CKAP2//RIPK2//CDH3//INHBB//PEMT//TRAF2//FGF19//ADGRF5//RFC3//APLN//TRIP13
GO:0000725	recombinational repair	Biological process	3	113	128	17653	3.66144	0.0490475	0.504616	1.30938	0.0234375	RFWD3//BRCA1//BRCA2
GO:0042177	negative regulation of protein catabolic process	Biological process	3	113	128	17653	3.66144	0.0490475	0.504616	1.30938	0.0234375	HSP90AB1//SHH//MAD2L1
GO:1903749	positive regulation of establishment of protein localization to mitochondrion	Biological process	3	113	128	17653	3.66144	0.0490475	0.504616	1.30938	0.0234375	PEMT//SREBF2//SELENOI
GO:0010171	body morphogenesis	Biological process	2	49	128	17653	5.62915	0.0491708	0.504616	1.30829	0.015625	FLVCR1//MSX1
GO:0030850	prostate gland development	Biological process	2	49	128	17653	5.62915	0.0491708	0.504616	1.30829	0.015625	SHH//NOTCH1
GO:0090329	regulation of DNA-dependent DNA replication	Biological process	2	49	128	17653	5.62915	0.0491708	0.504616	1.30829	0.015625	BRCA2//RFC3
GO:1902099	regulation of metaphase/anaphase transition of cell cycle	Biological process	2	49	128	17653	5.62915	0.0491708	0.504616	1.30829	0.015625	MAD2L1//TRIP13
GO:0048514	blood vessel morphogenesis	Biological process	9	656	128	17653	1.89211	0.0493062	0.505239	1.3071	0.0703125	TGFBI//APLN//SHH//RASA1//NOTCH1//PPARG//BRCA1//WNT11//B4GALT1
GO:0019219	regulation of nucleobase-containing compound metabolic process	Biological process	40	4328	128	17653	1.27462	0.0497459	0.508973	1.30324	0.3125	PDX1//MAGEA1//MSX1//NOTCH1//PPARG//YEATS2//RPS14//SHH//SREBF2//ESCO2//HELLS//BRCA2//NRF1//BRCA1//ELOC//HIRA//S100A11//IGF2BP1//NCOA6//TESC//WNT11//ZIC1//CCNA2//DKK3//CRB2//ADGRG3//WDR5//DNA2//TFRC//DDN//CKAP2//RIPK2//TRAF2//S100A9//RASA1//HSP90AB1//RFC3//ME1//APLN//TRIP13

## Sheet: go CC up mRNA CA vs NC
Ontology	Count	Pop.Hits	List.Total	Pop.Total	Fold.Enrichment	Pvalue	FDR	Enrichment.Score	Gene.Ratio	GENES
Cellular component	7	93	131	18698	10.7433	4.05082e-06	0.00347965	5.39246	0.0534351	ASPM//FAM83D//KIF20B//TPX2//MAD2L1//NUSAP1//YEATS2
Cellular component	102	11544	131	18698	1.26115	5.81768e-05	0.0249869	4.23525	0.778626	HSP90AB1//TRAF2//ANLN//B4GALT1//NOTCH1//SREBF2//RPS14//GRPEL2//DNAJC15//LARS//DRAM1//OLFM4//MTHFD2//DNA2//FLVCR1//ME1//RAP1GDS1//C15ORF62//GLB1//PAICS//IGF2BP1//CHML//RPTN//CARNMT1//TPX2//NCOA6//MCF2L//CKAP2//PDX1//MAD2L1//NME1//NRF1//MAP3K20//PLS3//PPARG//TESC//MOCOS//CEP72//CENPN//WSB2//CIP2A//RASA1//S100A9//NCAPG//SHH//BRCA2//ELOC//VSNL1//HIST1H2BL//RIPK2//WISP1//CCNA2//CCND2//ZC3HAV1L//FAR1//…
Cellular component	7	153	131	18698	6.53026	0.000102371	0.0293122	3.98982	0.0534351	ASPM//FAM83D//KIF20B//TPX2//CKAP2//POC1B//MAD2L1
Cellular component	9	324	131	18698	3.9648	0.0004686	0.100632	3.3292	0.0687023	TPX2//CKAP2//POC1B//MAD2L1//NUSAP1//KIF20B//YEATS2//ASPM//FAM83D
Cellular component	3	26	131	18698	16.4692	0.000776622	0.133424	3.10979	0.0229008	ASPM//FAM83D//KIF20B
Cellular component	15	892	131	18698	2.40022	0.00146597	0.209878	2.83387	0.114504	MAD2L1//ESCO2//CCND2//HIST1H2BL//NCAPG//RFC3//RFWD3//CENPN//CHAF1A//HIRA//DNA2//BRCA2//BRCA1//GINS1//HELLS
Cellular component	16	1018	131	18698	2.24334	0.00203347	0.245233	2.69176	0.122137	NCAPG//ESCO2//HELLS//MAD2L1//CENPN//DNA2//BRCA2//CCND2//HIST1H2BL//CHAF1A//HIRA//BRCA1//GINS1//RFC3//RFWD3//NUSAP1
Cellular component	84	9626	131	18698	1.24554	0.00228389	0.245233	2.64132	0.641221	OLFM4//MTHFD2//GRPEL2//DNA2//FLVCR1//HSP90AB1//ME1//RAP1GDS1//RPS14//C15ORF62//SREBF2//GLB1//PAICS//IGF2BP1//CHML//RPTN//CARNMT1//TPX2//NCOA6//MCF2L//CKAP2//PDX1//MAD2L1//NME1//NOTCH1//NRF1//LARS//MAP3K20//PLS3//PPARG//TESC//MOCOS//CEP72//CENPN//WSB2//CIP2A//RASA1//S100A9//NCAPG//SHH//BRCA2//ELOC//TRAF2//VSNL1//HIST1H2BL//RIPK2//WISP1//CCNA2//CCND2//ZC3HAV1L//TMED4//SLC35D3//ATP10A//SCD//ESCO2//B…
Cellular component	2	11	131	18698	25.9514	0.00257056	0.245346	2.58997	0.0152672	ANLN//KIF20B
Cellular component	2	13	131	18698	21.9589	0.00361224	0.273238	2.44222	0.0152672	GRPEL2//DNAJC15
Cellular component	6	210	131	18698	4.07808	0.00365201	0.273238	2.43747	0.0458015	ITGA9//B4GALT1//HSP90AB1//TFRC//NKD2//CLDN1
Cellular component	115	14673	131	18698	1.11867	0.00426863	0.273238	2.36971	0.877863	WDR5//B4GALT1//NOTCH1//SREBF2//BRCA1//TRAF2//RPS14//NCAPG//CCNA2//CCND2//HELLS//MAD2L1//CENPN//DNA2//BRCA2//ESCO2//HIST1H2BL//CHAF1A//HIRA//GINS1//TPX2//CKAP2//POC1B//GRPEL2//DNAJC15//TRIP13//NME1//LARS//DRAM1//OLFM4//MTHFD2//FLVCR1//HSP90AB1//ME1//RAP1GDS1//C15ORF62//GLB1//PAICS//IGF2BP1//CHML//RPTN//CARNMT1//NCOA6//MCF2L//PDX1//NRF1//MAP3K20//PLS3//PPARG//TESC//MOCOS//CEP72//WSB2//CIP2A//RASA1/…
Cellular component	2	15	131	18698	19.031	0.00481827	0.273238	2.31711	0.0152672	WDR5//YEATS2
Cellular component	2	16	131	18698	17.8416	0.00548144	0.273238	2.26111	0.0152672	BRCA1//BRCA2
Cellular component	113	14395	131	18698	1.12045	0.00553381	0.273238	2.25698	0.862595	BRCA1//TRAF2//CCNA2//CCND2//CDH3//PAICS//IGF2BP1//CAMSAP1//DUSP4//DDN//LRCH1//ASPM//GLB1//HSP90AB1//LRRIQ4//MAGEA1//NME1//NUSAP1//LARS//MAP3K20//PLS3//GNB1L//TESC//RFWD3//DRAM1//CASS4//NDRG3//CIP2A//RASA1//S100A9//S100A11//S100P//NCAPG//C15ORF62//SREBF2//WNT11//ZIC1//BICC1//FAM83D//NKD2//RIPK2//CLDN1//KIF20B//GINS1//NCOA6//BRCA2//DNAJC15//WDR5//DNA2//SERTM1//PPARG//FAR1//OLFM4//MTHFD2//GRPEL2//FL…
Cellular component	3	52	131	18698	8.23459	0.00578278	0.273238	2.23786	0.0229008	PEMT//B4GALT1//HSP90AB1
Cellular component	50	5188	131	18698	1.37561	0.00604368	0.273238	2.2187	0.381679	HSP90AB1//S100A9//S100A11//S100P//MTHFD2//GRPEL2//COL9A1//VCAN//RCN3//SHH//OLFM4//TCN1//GLB1//FAR1//DNA2//IGF2BP1//WDR5//CHML//ESCO2//DUSP4//TPX2//NCOA6//PDX1//MAD2L1//MSX1//NOTCH1//NRF1//ANLN//PPARG//RFWD3//CENPN//RFC3//RPS14//BRCA1//SREBF2//BRCA2//ELOC//TRAF2//HIRA//HIST1H2BL//CCNA2//CCND2//KIF20B//GINS1//NUSAP1//SCD//CHAF1A//YEATS2//NHS//LARS
Cellular component	50	5188	131	18698	1.37561	0.00604368	0.273238	2.2187	0.381679	MTHFD2//GRPEL2//COL9A1//VCAN//RCN3//SHH//OLFM4//TCN1//GLB1//HSP90AB1//FAR1//S100A9//S100A11//S100P//DNA2//IGF2BP1//WDR5//CHML//ESCO2//DUSP4//TPX2//NCOA6//PDX1//MAD2L1//MSX1//NOTCH1//NRF1//ANLN//PPARG//RFWD3//CENPN//RFC3//RPS14//BRCA1//SREBF2//BRCA2//ELOC//TRAF2//HIRA//HIST1H2BL//CCNA2//CCND2//KIF20B//GINS1//NUSAP1//SCD//CHAF1A//YEATS2//NHS//LARS
Cellular component	50	5188	131	18698	1.37561	0.00604368	0.273238	2.2187	0.381679	MTHFD2//GRPEL2//COL9A1//VCAN//RCN3//SHH//OLFM4//TCN1//GLB1//HSP90AB1//FAR1//S100A9//S100A11//S100P//DNA2//IGF2BP1//WDR5//CHML//ESCO2//DUSP4//TPX2//NCOA6//PDX1//MAD2L1//MSX1//NOTCH1//NRF1//ANLN//PPARG//RFWD3//CENPN//RFC3//RPS14//BRCA1//SREBF2//BRCA2//ELOC//TRAF2//HIRA//HIST1H2BL//CCNA2//CCND2//KIF20B//GINS1//NUSAP1//SCD//CHAF1A//YEATS2//NHS//LARS
Cellular component	9	479	131	18698	2.68183	0.00664023	0.28317	2.17782	0.0687023	RPTN//COL9A1//VCAN//SHH//TGFBI//WNT11//WISP1//IBSP//S100A9
Cellular component	11	668	131	18698	2.35039	0.00735116	0.28317	2.13364	0.0839695	OLFM4//IGF2BP1//GLB1//INHBB//MAD2L1//NME1//PPARG//SRD5A1//TFRC//APLN//KIF20B
Cellular component	7	321	131	18698	3.11255	0.00751343	0.28317	2.12416	0.0534351	GLB1//OLFM4//TCN1//HSP90AB1//S100A9//S100A11//S100P
Cellular component	36	3472	131	18698	1.47995	0.00779598	0.28317	2.10813	0.274809	WDR5//GINS1//YEATS2//NHS//LARS//S100P//RFWD3//HIRA//PDX1//NCOA6//ELOC//IGF2BP1//CHML//ESCO2//DNA2//DUSP4//TPX2//HSP90AB1//MAD2L1//MSX1//NOTCH1//NRF1//ANLN//PPARG//CENPN//RFC3//RPS14//S100A9//BRCA1//SREBF2//BRCA2//TRAF2//HIST1H2BL//CCNA2//CCND2//KIF20B
Cellular component	15	1069	131	18698	2.0028	0.00791163	0.28317	2.10173	0.114504	ITGA9//B4GALT1//HSP90AB1//TFRC//NKD2//CLDN1//ASPM//CRB2//NHS//NOTCH1//PEMT//S100P//NME1//TESC//DDN
Cellular component	2	20	131	18698	14.2733	0.00852168	0.292805	2.06947	0.0152672	ESCO2//HELLS
Cellular component	7	332	131	18698	3.00943	0.00895355	0.295811	2.048	0.0534351	PEMT//B4GALT1//HSP90AB1//S100P//NME1//TESC//DDN
Cellular component	7	338	131	18698	2.95601	0.00981972	0.30586	2.0079	0.0534351	HSP90AB1//S100A9//S100A11//S100P//GLB1//OLFM4//TCN1
Cellular component	7	339	131	18698	2.94729	0.00996984	0.30586	2.00131	0.0534351	HSP90AB1//S100A9//S100A11//S100P//GLB1//OLFM4//TCN1
Cellular component	7	347	131	18698	2.87934	0.0112319	0.332696	1.94955	0.0534351	HELLS//ESCO2//NCAPG//DNA2//BRCA2//MAD2L1//CENPN
Cellular component	5	194	131	18698	3.67868	0.0118752	0.340027	1.92536	0.0381679	MAD2L1//NCAPG//HELLS//CENPN//ESCO2
Cellular component	2	26	131	18698	10.9794	0.0141832	0.38944	1.84822	0.0152672	CAMSAP1//ASPM
Cellular component	7	366	131	18698	2.72986	0.0146891	0.38944	1.833	0.0534351	ASPM//CRB2//HSP90AB1//NHS//NOTCH1//CLDN1//ADGRF5
Cellular component	15	1152	131	18698	1.8585	0.014961	0.38944	1.82504	0.114504	TPX2//CAMSAP1//KIF20B//ASPM//CKAP2//POC1B//NME1//CEP72//BRCA2//WDR5//MAD2L1//NUSAP1//YEATS2//FAM83D//BRCA1
Cellular component	7	375	131	18698	2.66435	0.0165679	0.418583	1.78073	0.0534351	TGFBI//RPTN//COL9A1//VCAN//SHH//WNT11//WISP1
Cellular component	5	217	131	18698	3.28877	0.0184349	0.420902	1.73436	0.0381679	NCAPG//MAD2L1//CENPN//BRCA1//BRCA2
Cellular component	76	9080	131	18698	1.19468	0.018466	0.420902	1.73363	0.580153	ROGDI//MAD2L1//ESCO2//CCND2//HIST1H2BL//NCAPG//RFC3//RFWD3//IGF2BP1//WDR5//CHML//DNA2//DUSP4//TPX2//NCOA6//HSP90AB1//PDX1//MSX1//NOTCH1//NRF1//ANLN//PPARG//CENPN//RPS14//S100A9//BRCA1//SREBF2//BRCA2//ELOC//TRAF2//HIRA//CCNA2//KIF20B//GINS1//NUSAP1//SCD//MTHFD2//GRPEL2//PEMT//FLVCR1//CKAP2//POC1B//PLS3//B4GALT1//VCAN//COL9A1//RCN3//SHH//TMED4//DDN//ATP10A//SRD5A1//RHBDF2//SELENOI//OLFM4//TCN1//GLB…
Cellular component	7	385	131	18698	2.59514	0.0188489	0.420902	1.72471	0.0534351	TESC//RASA1//S100A11//IGF2BP1//NHS//NME1//DDN
Cellular component	6	300	131	18698	2.85466	0.0191428	0.420902	1.71799	0.0458015	ASPM//CRB2//HSP90AB1//NHS//NOTCH1//CLDN1
Cellular component	13	975	131	18698	1.9031	0.0193114	0.420902	1.71419	0.0992366	BRCA2//NKD2//NOTCH1//OLFM4//B4GALT1//HSP90AB1//S100A9//S100A11//S100P//C2CD4A//ADGRG3//TCN1//GLB1
Cellular component	39	4071	131	18698	1.36737	0.0195996	0.420902	1.70775	0.29771	IGF2BP1//WDR5//CHML//ESCO2//DNA2//DUSP4//TPX2//NCOA6//HSP90AB1//PDX1//MAD2L1//MSX1//NOTCH1//NRF1//ANLN//PPARG//RFWD3//CENPN//RFC3//RPS14//S100A9//BRCA1//SREBF2//BRCA2//ELOC//TRAF2//HIRA//HIST1H2BL//CCNA2//CCND2//KIF20B//GINS1//NUSAP1//SCD//CHAF1A//YEATS2//NHS//LARS//S100P
Cellular component	2	35	131	18698	8.15616	0.0249267	0.522244	1.60334	0.0152672	ESCO2//RFWD3
Cellular component	10	704	131	18698	2.02745	0.026343	0.538777	1.57933	0.0763359	ASPM//CKAP2//POC1B//NME1//CEP72//BRCA2//KIF20B//WDR5//BRCA1//TPX2
Cellular component	4	164	131	18698	3.48129	0.0283463	0.566266	1.5475	0.0305344	NME1//TESC//RASA1//S100A11
Cellular component	2	38	131	18698	7.51225	0.0290541	0.567216	1.53679	0.0152672	ESCO2//RFWD3
Cellular component	3	98	131	18698	4.36937	0.0315762	0.58611	1.50064	0.0229008	PEMT//B4GALT1//HSP90AB1
Cellular component	3	98	131	18698	4.36937	0.0315762	0.58611	1.50064	0.0229008	IGF2BP1//B4GALT1//LY6G6D
Cellular component	2	41	131	18698	6.96258	0.0334335	0.58611	1.47582	0.0152672	CCNA2//CCND2
Cellular component	2	41	131	18698	6.96258	0.0334335	0.58611	1.47582	0.0152672	BRCA1//BRCA2
Cellular component	2	41	131	18698	6.96258	0.0334335	0.58611	1.47582	0.0152672	BRCA1//BRCA2
Cellular component	11	841	131	18698	1.8669	0.0342304	0.588078	1.46559	0.0839695	NOTCH1//B4GALT1//HSP90AB1//S100A9//S100A11//S100P//OLFM4//ADGRG3//TCN1//GLB1//BRCA2
Cellular component	2	42	131	18698	6.7968	0.0349471	0.58862	1.45659	0.0152672	WDR5//YEATS2
Cellular component	76	9321	131	18698	1.16379	0.0367066	0.606364	1.43526	0.580153	SRD5A1//TRAF2//CCND2//PEMT//FLVCR1//WDR5//POC1B//B4GALT1//DNAJC15//NOTCH1//SREBF2//NME1//TFRC//FAR1//ROGDI//HSP90AB1//S100A9//S100A11//S100P//TGFBI//MTHFD2//GRPEL2//COL9A1//VCAN//RCN3//SHH//OLFM4//TCN1//GLB1//RPS14//HELLS//MAD2L1//CENPN//DNA2//BRCA2//ESCO2//HIST1H2BL//CHAF1A//HIRA//NCAPG//BRCA1//GINS1//RFC3//RFWD3//IGF2BP1//CHML//DUSP4//TPX2//NCOA6//PDX1//MSX1//NRF1//ANLN//PPARG//ELOC//CCNA2//KIF…
Cellular component	15	1319	131	18698	1.62319	0.0429471	0.696066	1.36707	0.114504	COL9A1//VCAN//RCN3//SHH//PEMT//TMED4//DDN//NOTCH1//ATP10A//SCD//SRD5A1//SREBF2//RHBDF2//SELENOI//TRAF2
Cellular component	40	4435	131	18698	1.28733	0.0439663	0.69939	1.35688	0.305344	ROGDI//MAD2L1//IGF2BP1//WDR5//CHML//ESCO2//DNA2//DUSP4//TPX2//NCOA6//HSP90AB1//PDX1//MSX1//NOTCH1//NRF1//ANLN//PPARG//RFWD3//CENPN//RFC3//RPS14//S100A9//BRCA1//SREBF2//BRCA2//ELOC//TRAF2//HIRA//HIST1H2BL//CCNA2//CCND2//KIF20B//GINS1//NUSAP1//SCD//NHS//LARS//S100P//CHAF1A//YEATS2
Cellular component	3	117	131	18698	3.65982	0.0491352	0.76614	1.30861	0.0229008	MAD2L1//CENPN//NCAPG
Cellular component	4	197	131	18698	2.89813	0.0499462	0.76614	1.3015	0.0305344	IGF2BP1//B4GALT1//LY6G6D//S100P

## Sheet: go MF up mRNA CA vs NC
GO.ID	Term	Ontology	Count	Pop.Hits	List.Total	Pop.Total	Fold.Enrichment	Pvalue	FDR	Enrichment.Score	Gene.Ratio	GENES
GO:0005509	calcium ion binding	Molecular function	15	699	123	17548	3.06152	0.000112306	0.145548	3.9496	0.121951	CDH3//RPTN//C2CD4A//VCAN//CRB2//NOTCH1//PLS3//TESC//RCN3//S100A9//S100A11//S100P//SHH//VSNL1//NKD2
GO:0042802	identical protein binding	Molecular function	24	1661	123	17548	2.06141	0.000473344	0.211974	3.32482	0.195122	CDH3//OLFM4//GRPEL2//HSP90AB1//INHBB//MAD2L1//NRF1//TESC//CIP2A//S100A11//S100P//TFRC//RIPK2//KIF20B//CHAF1A//PAICS//NME1//PPARG//CEP72//LY6G6D//BRCA2//TRAF2//CLDN1//TRIP13
GO:0005102	signaling receptor binding	Molecular function	23	1594	123	17548	2.05855	0.000645602	0.211974	3.19004	0.186992	APLN//FGF19//WNT11//NOTCH1//SHH//IL17C//INHBB//TRAF2//IBSP//TGFBI//WISP1//NTS//NRG2//HSP90AB1//NCOA6//PPARG//S100A9//SAA2//DKK3//BRCA1//S100P//RASA1//RIPK2
GO:0050839	cell adhesion molecule binding	Molecular function	11	489	123	17548	3.20927	0.000654242	0.211974	3.18426	0.0894309	IBSP//TGFBI//WISP1//CDH3//OLFM4//PAICS//HSP90AB1//ANLN//CIP2A//S100P//S100A11
GO:0042803	protein homodimerization activity	Molecular function	14	819	123	17548	2.43875	0.00179332	0.352316	2.74634	0.113821	CDH3//OLFM4//GRPEL2//HSP90AB1//INHBB//MAD2L1//NRF1//TESC//CIP2A//S100A11//S100P//TFRC//RIPK2//KIF20B
GO:0045296	cadherin binding	Molecular function	8	324	123	17548	3.52263	0.00203264	0.352316	2.69194	0.0650407	S100A11//CDH3//OLFM4//PAICS//HSP90AB1//ANLN//CIP2A//S100P
GO:0050786	RAGE receptor binding	Molecular function	2	11	123	17548	25.9394	0.00257173	0.352316	2.58978	0.0162602	S100A9//S100P
GO:0000287	magnesium ion binding	Molecular function	6	196	123	17548	4.36735	0.00259314	0.352316	2.58617	0.0487805	MTHFD2//NME1//MAP3K20//TESC//ATP10A//S100P
GO:0030545	receptor regulator activity	Molecular function	10	502	123	17548	2.84197	0.00281533	0.352316	2.55047	0.0813008	IL17C//INHBB//APLN//NTS//NRG2//FGF19//SHH//LY6G6D//SAA2//DKK3
GO:0036041	long-chain fatty acid binding	Molecular function	2	12	123	17548	23.7778	0.00307195	0.352316	2.51259	0.0162602	PPARG//S100A9
GO:0015631	tubulin binding	Molecular function	8	351	123	17548	3.25166	0.00332205	0.352316	2.47859	0.0650407	CAMSAP1//NUSAP1//S100A9//FAM83D//KIF20B//NME1//BRCA2//BRCA1
GO:0043142	single-stranded DNA-dependent ATPase activity	Molecular function	2	13	123	17548	21.9487	0.00361389	0.352316	2.44203	0.0162602	DNA2//RFC3
GO:0046983	protein dimerization activity	Molecular function	18	1286	123	17548	1.99689	0.00368307	0.352316	2.43379	0.146341	CDH3//OLFM4//GRPEL2//HSP90AB1//INHBB//MAD2L1//NRF1//TESC//CIP2A//S100A11//S100P//TFRC//RIPK2//KIF20B//NOTCH1//PPARG//HIST1H2BL//SREBF2
GO:0060589	nucleoside-triphosphatase regulator activity	Molecular function	8	359	123	17548	3.1792	0.00380588	0.352316	2.41955	0.0650407	GRPEL2//DNAJC15//CHML//LARS//RAP1GDS1//RASA1//C15ORF62//WNT11
GO:0098772	molecular function regulator	Molecular function	23	1848	123	17548	1.77561	0.00446261	0.367492	2.35041	0.186992	GRPEL2//DNAJC15//NOTCH1//TESC//MCF2L//NRG2//FGF19//CHML//LARS//RAP1GDS1//RASA1//C15ORF62//WNT11//IL17C//INHBB//APLN//NTS//SHH//CRB2//HSP90AB1//LY6G6D//SAA2//DKK3
GO:0008092	cytoskeletal protein binding	Molecular function	14	908	123	17548	2.19971	0.00454748	0.367492	2.34223	0.113821	ANLN//CAMSAP1//NUSAP1//S100A9//FAM83D//KIF20B//BRCA1//NKD2//NME1//BRCA2//PLS3//PPARG//CDH3//B4GALT1
GO:0046965	retinoid X receptor binding	Molecular function	2	15	123	17548	19.0222	0.00482049	0.367492	2.31691	0.0162602	NCOA6//PPARG
GO:0050840	extracellular matrix binding	Molecular function	3	52	123	17548	8.23077	0.00578357	0.416417	2.2378	0.0243902	ITGA9//SHH//TGFBI
GO:0010485	H4 histone acetyltransferase activity	Molecular function	2	18	123	17548	15.8519	0.00692844	0.472592	2.15936	0.0162602	WDR5//BRCA2
GO:0017049	GTP-Rho binding	Molecular function	2	21	123	17548	13.5873	0.00938026	0.607841	2.02779	0.0162602	ANLN//C15ORF62
GO:0048027	mRNA 5'-UTR binding	Molecular function	2	23	123	17548	12.4058	0.0111984	0.691101	1.95084	0.0162602	IGF2BP1//RPS14
GO:0042974	retinoic acid receptor binding	Molecular function	2	24	123	17548	11.8889	0.0121609	0.71055	1.91503	0.0162602	NCOA6//PPARG
GO:0030547	receptor inhibitor activity	Molecular function	2	25	123	17548	11.4133	0.0131583	0.71055	1.8808	0.0162602	LY6G6D//DKK3
GO:1901567	fatty acid derivative binding	Molecular function	2	25	123	17548	11.4133	0.0131583	0.71055	1.8808	0.0162602	PPARG//S100A9
GO:0043015	gamma-tubulin binding	Molecular function	2	27	123	17548	10.5679	0.0152558	0.756994	1.81656	0.0162602	NME1//BRCA2
GO:0005096	GTPase activator activity	Molecular function	6	286	123	17548	2.99301	0.0154799	0.756994	1.81023	0.0487805	CHML//LARS//RAP1GDS1//RASA1//C15ORF62//WNT11
GO:0005504	fatty acid binding	Molecular function	2	28	123	17548	10.1905	0.0163548	0.756994	1.78635	0.0162602	PPARG//S100A9
GO:0043236	laminin binding	Molecular function	2	28	123	17548	10.1905	0.0163548	0.756994	1.78635	0.0162602	SHH//ITGA9
GO:0048018	receptor ligand activity	Molecular function	8	472	123	17548	2.41808	0.018096	0.808702	1.74242	0.0650407	IL17C//INHBB//APLN//NTS//NRG2//FGF19//SHH//SAA2
GO:0005515	protein binding	Molecular function	92	11565	123	17548	1.13492	0.021261	0.918477	1.67242	0.747967	APLN//RASA1//BRCA2//MSX1//RFWD3//ANLN//MCF2L//NRG2//FGF19//RIPK2//WNT11//NOTCH1//SHH//IL17C//INHBB//TRAF2//IBSP//TGFBI//WISP1//NTS//CAMSAP1//ASPM//NUSAP1//S100A9//FAM83D//KIF20B//PPARG//SREBF2//CDH3//B4GALT1//BRCA1//YEATS2//C15ORF62//HSP90AB1//CHML//RHBDF2//NKD2//NCOA6//CRB2//NME1//TPX2//CCNA2//CCND2//C2CD4A//WDR5//DKK3//SAA2//CHAF1A//PAICS//MAD2L1//CEP72//LY6G6D//TFRC//CLDN1//TRIP13//OLFM4//GRPE…
GO:0008080	N-acetyltransferase activity	Molecular function	3	86	123	17548	4.97674	0.022567	0.943447	1.64653	0.0243902	ESCO2//BRCA2//WDR5
GO:0030695	GTPase regulator activity	Molecular function	6	316	123	17548	2.70886	0.0239494	0.968811	1.6207	0.0487805	CHML//LARS//RAP1GDS1//RASA1//C15ORF62//WNT11
GO:0035258	steroid hormone receptor binding	Molecular function	3	89	123	17548	4.80899	0.0246688	0.968811	1.60785	0.0243902	NCOA6//PPARG//BRCA1
GO:0016831	carboxy-lyase activity	Molecular function	2	37	123	17548	7.71171	0.0276638	1	1.55809	0.0162602	PAICS//ME1
GO:0019899	enzyme binding	Molecular function	24	2301	123	17548	1.48805	0.0287454	1	1.54143	0.195122	BRCA2//MCF2L//NRG2//FGF19//ANLN//C15ORF62//CHML//HSP90AB1//TPX2//ASPM//TRAF2//FAM83D//CCNA2//CCND2//PPARG//BRCA1//NKD2//MAGEA1//RASA1//RIPK2//NCOA6//CRB2//NME1//NOTCH1
GO:0030331	estrogen receptor binding	Molecular function	2	40	123	17548	7.13333	0.0319629	1	1.49535	0.0162602	NCOA6//PPARG
GO:0046915	transition metal ion transmembrane transporter activity	Molecular function	2	40	123	17548	7.13333	0.0319629	1	1.49535	0.0162602	SLC39A10//TFRC
GO:0016410	N-acyltransferase activity	Molecular function	3	103	123	17548	4.15534	0.0358239	1	1.44583	0.0243902	ESCO2//BRCA2//WDR5
GO:0060590	ATPase regulator activity	Molecular function	2	43	123	17548	6.63566	0.036506	1	1.43764	0.0162602	GRPEL2//DNAJC15
GO:0016407	acetyltransferase activity	Molecular function	3	105	123	17548	4.07619	0.0375969	1	1.42485	0.0243902	ESCO2//BRCA2//WDR5
GO:0008017	microtubule binding	Molecular function	5	268	123	17548	2.66169	0.0404801	1	1.39276	0.0406504	CAMSAP1//NUSAP1//S100A9//FAM83D//KIF20B
GO:0044212	transcription regulatory region DNA binding	Molecular function	11	877	123	17548	1.78943	0.0439831	1	1.35671	0.0894309	PPARG//MSX1//NME1//DDN//PDX1//NRF1//SREBF2//ZIC1//NOTCH1//BRCA1//WNT11
GO:0001067	regulatory region nucleic acid binding	Molecular function	11	878	123	17548	1.7874	0.0442833	1	1.35376	0.0894309	PPARG//MSX1//NME1//DDN//PDX1//NRF1//SREBF2//ZIC1//NOTCH1//BRCA1//WNT11
GO:0050661	NADP binding	Molecular function	2	48	123	17548	5.94444	0.0445878	1	1.35078	0.0162602	SRD5A1//ME1
GO:0003678	DNA helicase activity	Molecular function	2	50	123	17548	5.70667	0.0479891	1	1.31886	0.0162602	GINS1//DNA2

## Sheet: go BP down mRNA CA vs NC
GO.ID	Term	Ontology	Count	Pop.Hits	List.Total	Pop.Total	Fold.Enrichment	Pvalue	FDR	Enrichment.Score	Gene.Ratio	GENES
GO:0050804	modulation of chemical synaptic transmission	Biological process	17	335	224	17653	3.99921	1.39239e-06	0.00470836	5.85624	0.0758929	CHRNA3//CA2//CA7//JPH3//CNTN2//SYNGR1//RAB3B//LRRK2//GRIK1//CACNG4//ROR2//ARF1//TMEM108//SCGN//CALB2//KCNB1//GRIA3
GO:0099177	regulation of trans-synaptic signaling	Biological process	17	335	224	17653	3.99921	1.39239e-06	0.00470836	5.85624	0.0758929	CHRNA3//CA2//CA7//JPH3//CNTN2//SYNGR1//GRIA3//GRIK1//RAB3B//LRRK2//CACNG4//ROR2//ARF1//TMEM108//SCGN//CALB2//KCNB1
GO:0043269	regulation of ion transport	Biological process	22	622	224	17653	2.78742	1.48463e-05	0.0334685	4.82838	0.0982143	PLN//CHRNA3//MYO5A//PLA2G10//HCN4//SCN11A//CLIC1//KCNB1//KCNJ2//KCNJ5//KCNMA1//BEST3//CA2//RAB3B//GPM6B//IL16//JPH3//GCG//ARF1//CACNG4//CA7//PIRT
GO:0048878	chemical homeostasis	Biological process	31	1114	224	17653	2.19304	3.13699e-05	0.0351496	4.50349	0.138393	PRKAR2B//HCN4//ARF1//CYBRD1//MT1A//PDK4//GNG3//CCL28//PLN//KCNJ2//KCNMA1//MYO5A//CA2//CA7//LRRK2//GCG//GPR27//KCNB1//NGFR//FABP4//PLA2G10//SFTPA2//JPH3//CCL21//TTPA//SLC26A3//SLC9A2//SCGN//CALB2//COL4A3BP//POU3F3
GO:0045745	positive regulation of G-protein coupled receptor protein signaling pathway	Biological process	5	30	224	17653	13.1347	3.46093e-05	0.0351496	4.46081	0.0223214	LRRK2//VPS35//CNTN2//CHGA//GPR27
GO:0007268	chemical synaptic transmission	Biological process	22	667	224	17653	2.59937	4.27983e-05	0.0351496	4.36857	0.0982143	NAAA//SYN2//CHRNA3//CA2//CA7//GRIA3//GRIK1//JPH3//CNTN2//SYNGR1//RAB3B//LRRK2//CACNG4//ROR2//ARF1//TMEM108//SCGN//CALB2//KCNB1//MYO5A//PNOC//SST
GO:0098916	anterograde trans-synaptic signaling	Biological process	22	667	224	17653	2.59937	4.27983e-05	0.0351496	4.36857	0.0982143	CHRNA3//GRIK1//MYO5A//PNOC//SST//SYN2//NAAA//CA2//CA7//GRIA3//JPH3//CNTN2//SYNGR1//RAB3B//LRRK2//CACNG4//ROR2//ARF1//TMEM108//SCGN//CALB2//KCNB1
GO:0099537	trans-synaptic signaling	Biological process	22	670	224	17653	2.58773	4.57517e-05	0.0351496	4.33959	0.0982143	CHRNA3//GRIK1//MYO5A//PNOC//SST//SYN2//NAAA//CA2//CA7//GRIA3//JPH3//CNTN2//SYNGR1//RAB3B//LRRK2//CACNG4//ROR2//ARF1//TMEM108//SCGN//CALB2//KCNB1
GO:0099536	synaptic signaling	Biological process	22	671	224	17653	2.58387	4.6776e-05	0.0351496	4.32998	0.0982143	CHRNA3//GRIK1//MYO5A//PNOC//SST//SYN2//NAAA//CA2//CA7//GRIA3//JPH3//CNTN2//SYNGR1//RAB3B//LRRK2//CACNG4//ROR2//ARF1//TMEM108//SCGN//CALB2//KCNB1
GO:0007610	behavior	Biological process	20	583	224	17653	2.70353	5.64284e-05	0.0381625	4.2485	0.0892857	MDK//HAND2//PRKAR2B//JPH3//CNTN2//CHRNA3//HPGDS//NRG1//MEIS1//GCG//LGI4//HOXD9//MYO5A//PTCHD1//LRRK2//FOXP2//PIRT//DMRTA1//VPS35//INSL5
GO:0032501	multicellular organismal process	Biological process	124	7496	224	17653	1.30365	6.28388e-05	0.0386344	4.20177	0.553571	EVC//HOXD13//BMP3//MGP//ROR2//GPM6B//RAMP1//FGF10//MEIS1//MEOX2//HAND2//DMRTA1//SFRP2//ZFPM2//MYOCD//GLI3//MDK//TXNDC8//COL4A3BP//KLF2//SOX10//TLX3//MATN2//FABP4//CA2//TTPA//NRG1//RSPO3//CHGA//MYL2//PLN//HCN4//LOXL4//MYH15//TNFRSF13B//FCGR2B//ITM2A//PRKAR2B//INSM1//LMOD1//MYH11//CALD1//CHRNA3//SHISA3//CDH19//FAS//NGFR//MBNL3//EBF4//TNFRSF17//LRRK2//CFAP54//TDRP//ASXL3//BPNT1//GRIK1//GDF7//KIF5C//…
GO:0010646	regulation of cell communication	Biological process	69	3522	224	17653	1.54394	6.9578e-05	0.039213	4.15753	0.308036	LRRK2//FGF10//GNG3//NRG1//GCG//KCNB1//RAMP1//GNG7//C3ORF58//RGS19//ROR2//INSL5//GDF7//EFEMP1//FCGR2B//IL16//MDK//PNOC//CCL28//CCL21//SFRP2//BMP3//SST//VIP//CHRNA3//RGS13//VPS35//RSPO3//CDKN2B//TGFB1I1//MYOCD//MYO5A//ACAP3//CA2//CA7//FAS//ARHGEF4//ABRA//GPR27//GREM2//DHX58//NGFR//ERH//KAT2B//GLI3//EVC//JPH3//CNTN2//SYNGR1//GRIA3//GRIK1//STAP1//ARHGAP10//TMEM108//RAB3B//CACNG4//ARF1//PLN//CTNND2//H…
GO:0030004	cellular monovalent inorganic cation homeostasis	Biological process	8	114	224	17653	5.53039	0.00010298	0.0535735	3.98725	0.0357143	KCNJ2//KCNMA1//CA2//CA7//LRRK2//TTPA//SLC26A3//SLC9A2
GO:0023051	regulation of signaling	Biological process	69	3575	224	17653	1.52105	0.000112028	0.0541174	3.95067	0.308036	LRRK2//FGF10//GNG3//NRG1//GCG//KCNB1//RAMP1//GNG7//C3ORF58//RGS19//ROR2//INSL5//GDF7//EFEMP1//FCGR2B//IL16//MDK//PNOC//CCL28//CCL21//SFRP2//BMP3//SST//VIP//CHRNA3//RGS13//VPS35//RSPO3//CDKN2B//TGFB1I1//MYOCD//MYO5A//ACAP3//CA2//CA7//FAS//ARHGEF4//ABRA//GPR27//GREM2//DHX58//NGFR//ERH//KAT2B//GLI3//EVC//JPH3//CNTN2//SYNGR1//GRIA3//GRIK1//STAP1//ARHGAP10//TMEM108//RAB3B//CACNG4//ARF1//PLN//CTNND2//H…
GO:0006928	movement of cell or subcellular component	Biological process	46	2090	224	17653	1.73453	0.000125028	0.0563708	3.90299	0.205357	SOX10//TLX3//MATN2//CCL21//CHGA//HAND2//MYH15//KIF5C//MYH11//MYO5A//GDF7//GLI3//NGFR//SPTB//CNTN2//PLA2G10//TMEM108//FGF10//STAP1//MMP28//TSPAN1//MDK//POU3F3//NRG1//LRRK2//MYL2//MLPH//PLTP//TMIGD1//SST//NEXN//INSM1//ROR2//SFRP2//IL16//CFAP54//CCL28//GPR15//KCNJ2//PLN//MEOX2//KCNJ5//PHLDB2//MYOCD//NEXMIF
GO:0007588	excretion	Biological process	6	64	224	17653	7.38825	0.000158417	0.0669245	3.8002	0.0267857	MDK//KCNMA1//CHRNA3//SLC26A3//GUCA2B//POU3F3
GO:0007626	locomotory behavior	Biological process	10	191	224	17653	4.12608	0.000168227	0.0669245	3.77411	0.0446429	CNTN2//LGI4//HOXD9//MYO5A//LRRK2//VPS35//CHRNA3//HPGDS//NRG1//MEIS1
GO:0006936	muscle contraction	Biological process	14	355	224	17653	3.10792	0.000185034	0.0676137	3.73275	0.0625	MYH11//CHRNA3//MYL2//MYOCD//PLN//KCNJ2//SYNM//HCN4//KCNMA1//CHGA//KCNJ5//COL4A3BP//LMOD1//CALD1
GO:0055067	monovalent inorganic cation homeostasis	Biological process	9	158	224	17653	4.48907	0.000189954	0.0676137	3.72135	0.0401786	PDK4//KCNJ2//KCNMA1//CA2//CA7//LRRK2//TTPA//SLC26A3//SLC9A2
GO:0010469	regulation of signaling receptor activity	Biological process	18	543	224	17653	2.61242	0.000204142	0.0690306	3.69007	0.0803571	GREM2//CACNG4//INSL5//GDF7//EFEMP1//FCGR2B//FGF10//GCG//NRG1//IL16//MDK//PNOC//CCL28//CCL21//SFRP2//BMP3//SST//VIP
GO:0015701	bicarbonate transport	Biological process	5	44	224	17653	8.95546	0.000228304	0.0735247	3.64149	0.0223214	SLC26A3//CA1//CA2//CA4//CA7
GO:0007267	cell-cell signaling	Biological process	38	1658	224	17653	1.80622	0.000243204	0.0747632	3.61403	0.169643	CTNND2//VPS35//TGFB1I1//RSPO3//ROR2//CHRNA3//GRIK1//MYO5A//PNOC//SST//SYN2//NAAA//GCG//KCNB1//SFRP2//CA2//CA7//GRIA3//GPR27//JPH3//CNTN2//SYNGR1//RAB3B//LRRK2//CACNG4//ARF1//FGF10//VIP//HCN4//GLI3//SOX10//SCEL//TMEM108//KCNJ5//SCGN//CALB2//CCL21//BMP3
GO:0045807	positive regulation of endocytosis	Biological process	8	131	224	17653	4.8127	0.000269342	0.0791983	3.5697	0.0357143	CCL21//FCGR2B//SFTPA2//STAP1//LRRK2//C2//TSPAN1//ARF1
GO:0006811	ion transport	Biological process	37	1610	224	17653	1.81112	0.000281753	0.0793957	3.55013	0.165179	SLC36A1//HCN4//KCNJ2//KCNJ5//KCNMA1//SLC17A4//SCN11A//RAMP1//PLN//SLC26A3//CLIC1//TCN2//CHRNA3//CA1//CA2//CA4//CA7//SLC51B//PLTP//MYO5A//PLA2G10//GRIA3//GRIK1//AQP8//KCNB1//BEST3//JPH3//CCL21//RAB3B//GPM6B//IL16//CACNG4//SLC9A2//GCG//ARF1//C15ORF48//PIRT
GO:0006885	regulation of pH	Biological process	7	102	224	17653	5.40839	0.000320836	0.0852796	3.49372	0.03125	CA2//CA7//LRRK2//TTPA//SLC26A3//SLC9A2//PDK4
GO:0055082	cellular chemical homeostasis	Biological process	22	773	224	17653	2.24292	0.000351637	0.0852796	3.45391	0.0982143	ARF1//CYBRD1//MT1A//GNG3//CCL28//PLN//KCNJ2//KCNMA1//MYO5A//CA2//CA7//LRRK2//GCG//GPR27//JPH3//CCL21//TTPA//SLC26A3//SLC9A2//SCGN//CALB2//KCNB1
GO:0014706	striated muscle tissue development	Biological process	14	379	224	17653	2.91111	0.000359995	0.0852796	3.4437	0.0625	MYH15//NRG1//ZFPM2//HOXD9//MEOX2//FOXP2//ASB2//PLN//MYH11//NEXN//MYL2//MYOCD//C3ORF58//MEIS1
GO:0051049	regulation of transport	Biological process	40	1821	224	17653	1.73109	0.000391249	0.0852796	3.40755	0.178571	ARF1//GCG//KCNB1//PLTP//PLN//CHRNA3//RAB3B//MYO5A//PLA2G10//LRRK2//CHGA//HCN4//SCN11A//CLIC1//KCNJ2//KCNJ5//KCNMA1//GPR27//GLI3//CHP2//BEST3//FCGR2B//CA2//TSPAN1//FGF10//CCL21//IL1R2//SFTPA2//NRG1//GPM6B//IL16//STAP1//JPH3//VPS35//SLC51B//CACNG4//C2//CA7//PIRT//NGFR
GO:0050896	response to stimulus	Biological process	141	9123	224	17653	1.21801	0.000405799	0.0852796	3.39169	0.629464	LRRK2//FGF10//NRG1//SPTB//GNG3//MYOCD//MDK//KCNMA1//FCGR2B//SFTPA2//TNFRSF13B//SLAMF7//TNFRSF17//CD1B//CD79B//ITM2A//HLA-DQB1//CCL21//VNN1//CHGA//HSPB2//IGLL5//DHX58//ZFPM2//PRKAR2B//C2//CTNND2//VPS35//TGFB1I1//RSPO3//ROR2//COL4A3BP//CHRNA3//CLIC1//FYB2//GCG//HPGDS//GNAL//GPR27//IGFALS//FAS//KLRC3//ASB2//PNOC//DIRAS2//ARHGAP10//SPARCL1//TAAR5//CD69//STAP1//ARHGEF4//KCTD9//CMBL//CCL28//SCEL//NGFR/…
GO:0048546	digestive tract morphogenesis	Biological process	5	50	224	17653	7.8808	0.000418768	0.0852796	3.37803	0.0223214	GLI3//FGF10//HOXD13//SFRP2//SOX10
GO:0048736	appendage development	Biological process	9	176	224	17653	4.02996	0.000422378	0.0852796	3.3743	0.0401786	GLI3//HOXD9//HOXD13//ROR2//SFRP2//HAND2//MEOX2//KAT2B//FGF10
GO:0060173	limb development	Biological process	9	176	224	17653	4.02996	0.000422378	0.0852796	3.3743	0.0401786	GLI3//HOXD9//HOXD13//ROR2//SFRP2//HAND2//FGF10//MEOX2//KAT2B
GO:0007422	peripheral nervous system development	Biological process	6	77	224	17653	6.14089	0.000436962	0.0852796	3.35956	0.0267857	GSTM3//LGI4//HOXD9//HAND2//NRG1//SOX10
GO:0008277	regulation of G-protein coupled receptor protein signaling pathway	Biological process	8	141	224	17653	4.47138	0.000442436	0.0852796	3.35415	0.0357143	RGS13//LRRK2//VPS35//CNTN2//CHGA//GPR27//RAMP1//GNG7
GO:0045596	negative regulation of cell differentiation	Biological process	20	682	224	17653	2.31109	0.000450156	0.0852796	3.34664	0.0892857	SOX10//SFRP2//MYOCD//LRRK2//NGFR//EFEMP1//ZFPM2//TGFB1I1//MEIS1//MBNL3//GLI3//TLX3//CNTN2//HAND2//TTPA//STAP1//FCGR2B//NRG1//NEXMIF//FGF10
GO:0030003	cellular cation homeostasis	Biological process	19	631	224	17653	2.37298	0.00045395	0.0852796	3.34299	0.0848214	ARF1//CYBRD1//MT1A//GNG3//CCL28//PLN//KCNJ2//KCNMA1//MYO5A//CA2//CA7//LRRK2//JPH3//CCL21//TTPA//SLC26A3//SLC9A2//SCGN//CALB2
GO:0030029	actin filament-based process	Biological process	21	739	224	17653	2.23947	0.000489818	0.0869892	3.30997	0.09375	MOB2//LMOD1//ARF1//MYO5A//MYL2//MLPH//MYH11//CDC42EP1//CCL21//EPB41L4A//FGF10//SYNPO2//GPM6B//ABRA//PHLDB2//SPTB//KCNJ2//PLN//KCNJ5//STAP1
GO:0042391	regulation of membrane potential	Biological process	15	438	224	17653	2.69891	0.000494845	0.0869892	3.30553	0.0669643	KCNB1//HCN4//KCNJ2//SCN11A//CLIC1//CACNG4//LRRK2//CHRNA3//GRIA3//GRIK1//SLC26A3//PLN//TMEM108//KCNJ5//KCNMA1
GO:0050848	regulation of calcium-mediated signaling	Biological process	6	79	224	17653	5.98542	0.000501638	0.0869892	3.29961	0.0267857	MYO5A//PLN//JPH3//NRG1//CHP2//LRRK2
GO:0071417	cellular response to organonitrogen compound	Biological process	17	537	224	17653	2.49485	0.000518559	0.0876754	3.2852	0.0758929	PDK4//CPEB1//MYO5A//KAT2B//CA2//TRARG1//HCN4//SLC26A3//AQP8//GCG//GNG3//GNG7//PRKAR2B//KLF2//LRRK2//FCGR2B//NGFR
GO:0009719	response to endogenous stimulus	Biological process	36	1606	224	17653	1.76656	0.000549011	0.0888252	3.26042	0.160714	PDK4//FGF10//SST//CPEB1//GDF7//ROR2//GREM2//BMP3//CDKN2B//TGFB1I1//MYOCD//SFRP2//PLN//MYO5A//KAT2B//RAMP1//HOXD13//FOXP2//CCL21//CA2//TRARG1//MDK//HCN4//SLC26A3//AQP8//GCG//GNG3//GNG7//PRKAR2B//SOX10//KLF2//CHRNA3//LRRK2//FCGR2B//NGFR//TMEM108
GO:0060537	muscle tissue development	Biological process	14	396	224	17653	2.78614	0.000556675	0.0888252	3.2544	0.0625	MYH15//NRG1//ZFPM2//HOXD9//MEOX2//FOXP2//ASB2//PLN//MYH11//NEXN//MYL2//MYOCD//C3ORF58//MEIS1
GO:0006873	cellular ion homeostasis	Biological process	19	645	224	17653	2.32148	0.000592451	0.0888252	3.22735	0.0848214	ARF1//CYBRD1//MT1A//GNG3//CCL28//PLN//KCNJ2//KCNMA1//MYO5A//CA2//CA7//LRRK2//JPH3//CCL21//TTPA//SLC26A3//SLC9A2//SCGN//CALB2
GO:1901653	cellular response to peptide	Biological process	13	353	224	17653	2.90228	0.00059895	0.0888252	3.22261	0.0580357	PDK4//MYO5A//CPEB1//KAT2B//CA2//TRARG1//GCG//GNG3//GNG7//PRKAR2B//FCGR2B//NGFR//KLF2
GO:0022029	telencephalon cell migration	Biological process	5	54	224	17653	7.29704	0.000599917	0.0888252	3.22191	0.0223214	POU3F3//GLI3//NRG1//CNTN2//LRRK2
GO:0010647	positive regulation of cell communication	Biological process	38	1737	224	17653	1.72407	0.000604164	0.0888252	3.21885	0.169643	LRRK2//FGF10//GNG3//NRG1//GDF7//BMP3//VPS35//RSPO3//CDKN2B//TGFB1I1//MYOCD//CA2//CA7//ABRA//GCG//GPR27//CCL21//FAS//NGFR//ROR2//ERH//KAT2B//EVC//FCGR2B//STAP1//TMEM108//RAB3B//CACNG4//CNTN2//HAND2//CHP2//SFRP2//SCEL//DHX58//SCGN//CALB2//CHGA//LIMS2
GO:0032879	regulation of localization	Biological process	53	2700	224	17653	1.54697	0.000624005	0.0897904	3.20481	0.236607	ARF1//GCG//KCNB1//FGF10//STAP1//MMP28//PLTP//PLN//PLA2G10//CHRNA3//RAB3B//NRG1//TMIGD1//SST//NEXN//INSM1//ROR2//SFRP2//MYO5A//VIP//LRRK2//CHGA//HCN4//SCN11A//CLIC1//KCNJ2//KCNJ5//KCNMA1//GPR27//GLI3//CHP2//BEST3//FCGR2B//CA2//TSPAN1//CCL21//IL1R2//SFTPA2//JPH3//GPM6B//IL16//VPS35//SLC51B//MEOX2//NGFR//CCL28//PHLDB2//MYOCD//CACNG4//C2//NEXMIF//CA7//PIRT
GO:0023056	positive regulation of signaling	Biological process	38	1743	224	17653	1.71813	0.000645152	0.0908993	3.19034	0.169643	LRRK2//FGF10//GNG3//NRG1//GDF7//BMP3//VPS35//RSPO3//CDKN2B//TGFB1I1//MYOCD//CA2//CA7//ABRA//GCG//GPR27//CCL21//FAS//NGFR//ROR2//ERH//KAT2B//EVC//FCGR2B//STAP1//TMEM108//RAB3B//CACNG4//CNTN2//HAND2//CHP2//SFRP2//SCEL//DHX58//SCGN//CALB2//CHGA//LIMS2
GO:0055080	cation homeostasis	Biological process	20	707	224	17653	2.22936	0.000706087	0.0974544	3.15114	0.0892857	ARF1//CYBRD1//MT1A//PDK4//GNG3//CCL28//PLN//KCNJ2//KCNMA1//MYO5A//CA2//CA7//LRRK2//JPH3//CCL21//TTPA//SLC26A3//SLC9A2//SCGN//CALB2
GO:0003012	muscle system process	Biological process	15	456	224	17653	2.59237	0.000748162	0.099771	3.126	0.0669643	HCN4//COL4A3BP//LMOD1//MYH11//CALD1//CHRNA3//MYL2//MYOCD//HAND2//PLN//KCNJ2//SYNM//KCNMA1//CHGA//KCNJ5
GO:2000026	regulation of multicellular organismal development	Biological process	42	2008	224	17653	1.64838	0.000752377	0.099771	3.12356	0.1875	FGF10//GLI3//SOX10//HAND2//PHLDB2//TGFB1I1//SFRP2//MOB2//LRRK2//NGFR//MGP//GPM6B//EVI2B//CNTN2//LGI4//NRG1//EFEMP1//VNN1//IKZF3//MEIS1//ROR2//KAT2B//TLX3//GDF7//NAP1L2//CA2//ASPA//CHRNA3//ZFPM2//FOXP2//HOXD13//ARF1//MEOX2//LMO1//KLF2//STAP1//VPS35//RSPO3//LIMS2//MYOCD//FCGR2B//NEXMIF
GO:0021885	forebrain cell migration	Biological process	5	57	224	17653	6.91299	0.000770214	0.100172	3.11339	0.0223214	POU3F3//GLI3//NRG1//CNTN2//LRRK2
GO:0098771	inorganic ion homeostasis	Biological process	20	720	224	17653	2.18911	0.000883197	0.112699	3.05394	0.0892857	ARF1//CYBRD1//MT1A//PDK4//GNG3//CCL28//PLN//KCNJ2//KCNMA1//MYO5A//CA2//CA7//LRRK2//JPH3//CCL21//TTPA//SLC26A3//SLC9A2//SCGN//CALB2
GO:0071495	cellular response to endogenous stimulus	Biological process	31	1350	224	17653	1.80967	0.000936885	0.117336	3.02831	0.138393	PDK4//FGF10//SST//CPEB1//GDF7//ROR2//GREM2//BMP3//CDKN2B//TGFB1I1//MYOCD//SFRP2//MYO5A//KAT2B//RAMP1//CA2//TRARG1//HCN4//SLC26A3//AQP8//GCG//GNG3//GNG7//PRKAR2B//SOX10//KLF2//CHRNA3//LRRK2//FCGR2B//NGFR//TMEM108
GO:0050801	ion homeostasis	Biological process	21	779	224	17653	2.12448	0.000960846	0.118149	3.01735	0.09375	HCN4//ARF1//CYBRD1//MT1A//PDK4//GNG3//CCL28//PLN//KCNJ2//KCNMA1//MYO5A//CA2//CA7//LRRK2//JPH3//CCL21//TTPA//SLC26A3//SLC9A2//SCGN//CALB2
GO:0040011	locomotion	Biological process	39	1845	224	17653	1.66586	0.000980889	0.11846	3.00838	0.174107	SOX10//TLX3//MATN2//CCL21//CHGA//HAND2//CCL28//GDF7//GLI3//KIF5C//NGFR//SPTB//CNTN2//PLA2G10//FGF10//STAP1//MMP28//TSPAN1//MDK//POU3F3//NRG1//LRRK2//PLTP//TMIGD1//SST//NEXN//INSM1//ROR2//SFRP2//IL16//MYO5A//CFAP54//GPR15//MEOX2//VPS35//PHLDB2//MYOCD//NEXMIF//JPH3
GO:0051453	regulation of intracellular pH	Biological process	6	91	224	17653	5.19613	0.00106076	0.125565	2.97438	0.0267857	CA2//CA7//LRRK2//TTPA//SLC26A3//SLC9A2
GO:0006730	one-carbon metabolic process	Biological process	4	36	224	17653	8.75645	0.00108111	0.125565	2.96613	0.0178571	CA1//CA2//CA4//CA7
GO:0032970	regulation of actin filament-based process	Biological process	13	377	224	17653	2.71752	0.00109542	0.125565	2.96042	0.0580357	CDC42EP1//LMOD1//CCL21//SYNPO2//GPM6B//ARF1//PHLDB2//SPTB//KCNJ2//PLN//HCN4//STAP1//ABRA
GO:0045944	positive regulation of transcription by RNA polymerase II	Biological process	27	1132	224	17653	1.8797	0.00117707	0.129029	2.9292	0.120536	MYOCD//KAT2B//GCG//KLF2//NGFR//HAND2//CDKN2B//ABRA//FGF10//IKZF3//ZFPM2//SSBP2//GLI3//NRG1//HOXD9//HOXD13//LMO1//MEIS1//MEOX2//POU2AF1//POU3F3//EBF4//CHP2//SFRP2//SOX10//SPIB//ASXL3
GO:0022010	central nervous system myelination	Biological process	3	17	224	17653	13.9073	0.00120195	0.129029	2.92011	0.0133929	ASPA//SOX10//CNTN2
GO:0032291	axon ensheathment in central nervous system	Biological process	3	17	224	17653	13.9073	0.00120195	0.129029	2.92011	0.0133929	ASPA//SOX10//CNTN2
GO:0055119	relaxation of cardiac muscle	Biological process	3	17	224	17653	13.9073	0.00120195	0.129029	2.92011	0.0133929	CHGA//PLN//KCNJ2
GO:1901699	cellular response to nitrogen compound	Biological process	18	637	224	17653	2.22691	0.00131838	0.131265	2.87996	0.0803571	PDK4//CPEB1//MYO5A//KAT2B//CA2//TRARG1//HCN4//SLC26A3//AQP8//GCG//GNG3//GNG7//PRKAR2B//KLF2//CHRNA3//LRRK2//FCGR2B//NGFR
GO:0030641	regulation of cellular pH	Biological process	6	95	224	17653	4.97735	0.00132639	0.131265	2.87733	0.0267857	CA2//CA7//LRRK2//TTPA//SLC26A3//SLC9A2
GO:0002686	negative regulation of leukocyte migration	Biological process	4	38	224	17653	8.29558	0.00132821	0.131265	2.87673	0.0178571	STAP1//MMP28//CCL28//CCL21
GO:0010559	regulation of glycoprotein biosynthetic process	Biological process	4	38	224	17653	8.29558	0.00132821	0.131265	2.87673	0.0178571	CCL21//ITM2A//RAMP1//SLC51B
GO:0051093	negative regulation of developmental process	Biological process	24	968	224	17653	1.95392	0.00133025	0.131265	2.87607	0.107143	SOX10//SFRP2//MYOCD//LRRK2//NGFR//EFEMP1//FGF10//ZFPM2//TGFB1I1//MEIS1//MBNL3//GLI3//TLX3//CNTN2//HAND2//MEOX2//TTPA//KLF2//PHLDB2//STAP1//LIMS2//FCGR2B//NRG1//NEXMIF
GO:0048518	positive regulation of biological process	Biological process	96	5841	224	17653	1.29525	0.00133924	0.131265	2.87314	0.428571	LRRK2//FGF10//GNG3//NRG1//FAS//MOB2//CCL28//CCL21//GLI3//SOX10//FOXP2//SFTPA2//FCGR2B//MYOCD//C2//NGFR//IGLL5//CHRNA3//KAT2B//POU3F3//CHP2//SFRP2//VIP//HAND2//STAP1//VPS35//KCNB1//TGFB1I1//PLA2G10//GCG//CCDC80//GDF7//BMP3//PLTP//CNTN2//KLF2//ABRA//MDK//ROR2//FYB2//HLA-DQB1//RSPO3//INSM1//CFHR4//GPM6B//CDKN2B//RAMP1//CHGA//CDC42EP1//LMOD1//EVI2B//GUCA2B//CA2//CA7//SYNPO2//LONRF2//DHX58//VNN1//PRKA…
GO:0042733	embryonic digit morphogenesis	Biological process	5	65	224	17653	6.06216	0.00139991	0.135251	2.8539	0.0223214	GLI3//HOXD13//ROR2//SFRP2//HAND2
GO:0019725	cellular homeostasis	Biological process	23	916	224	17653	1.9788	0.00142327	0.135572	2.84671	0.102679	TXNDC8//ARF1//CYBRD1//MT1A//GNG3//CCL28//PLN//KCNJ2//KCNMA1//MYO5A//CA2//CA7//LRRK2//GCG//GPR27//JPH3//CCL21//TTPA//SLC26A3//SLC9A2//SCGN//CALB2//KCNB1
GO:0071377	cellular response to glucagon stimulus	Biological process	4	39	224	17653	8.08288	0.00146545	0.137311	2.83403	0.0178571	GCG//GNG3//GNG7//PRKAR2B
GO:0045595	regulation of cell differentiation	Biological process	37	1761	224	17653	1.65582	0.00149685	0.137311	2.82482	0.165179	GLI3//SOX10//PHLDB2//TGFB1I1//SFRP2//PLA2G10//MYOCD//MOB2//LRRK2//NGFR//EVI2B//CNTN2//EFEMP1//VNN1//IKZF3//FGF10//INSM1//ZFPM2//MEIS1//ROR2//KAT2B//MBNL3//TLX3//GDF7//NAP1L2//HAND2//CLIC1//CA2//NRG1//ASPA//CHRNA3//ARF1//TTPA//LMO1//STAP1//FCGR2B//NEXMIF
GO:0048731	system development	Biological process	81	4760	224	17653	1.34106	0.00150244	0.137311	2.8232	0.361607	EVC//HOXD13//BMP3//MGP//ROR2//RAMP1//FGF10//MEIS1//MEOX2//HAND2//DMRTA1//SFRP2//ZFPM2//MYOCD//GLI3//SOX10//TLX3//MATN2//CA2//TTPA//LOXL4//RSPO3//MYH15//TNFRSF13B//FCGR2B//ITM2A//COL4A3BP//NRG1//INSM1//ASXL3//BPNT1//CHRNA3//GPM6B//GRIK1//MDK//GDF7//KIF5C//NGFR//SPTB//CNTN2//PLA2G10//POU3F3//GYS1//MYL2//KAT2B//HOXD9//FOXP2//GSTM3//PHLDB2//TGFB1I1//MOB2//LRRK2//LGI4//TMEM108//PTCHD1//ASPA//CD79B//SC…
GO:0007275	multicellular organism development	Biological process	89	5351	224	17653	1.31077	0.0015827	0.141606	2.8006	0.397321	EVC//HOXD13//BMP3//MGP//ROR2//RAMP1//FGF10//MEIS1//MEOX2//HAND2//DMRTA1//SFRP2//ZFPM2//MYOCD//GLI3//COL4A3BP//KLF2//SOX10//TLX3//MATN2//CA2//TTPA//LOXL4//RSPO3//MYH15//TNFRSF13B//FCGR2B//ITM2A//NRG1//INSM1//ASXL3//BPNT1//CHRNA3//GPM6B//GRIK1//MDK//GDF7//KIF5C//NGFR//SPTB//CNTN2//PLA2G10//POU3F3//GYS1//MYL2//KAT2B//HOXD9//FOXP2//GSTM3//LRRK2//SCEL//GREM2//PHLDB2//TGFB1I1//MOB2//LGI4//TMEM108//PTCH…
GO:0043030	regulation of macrophage activation	Biological process	4	40	224	17653	7.8808	0.00161226	0.141606	2.79257	0.0178571	FCGR2B//LRRK2//STAP1//PLA2G10
GO:0046189	phenol-containing compound biosynthetic process	Biological process	4	40	224	17653	7.8808	0.00161226	0.141606	2.79257	0.0178571	INSM1//MYO5A//VPS35//HAND2
GO:0010721	negative regulation of cell development	Biological process	11	301	224	17653	2.88003	0.00166016	0.14391	2.77985	0.0491071	SOX10//LRRK2//NGFR//GLI3//TLX3//MEIS1//CNTN2//TTPA//STAP1//NRG1//NEXMIF
GO:0010560	positive regulation of glycoprotein biosynthetic process	Biological process	3	19	224	17653	12.4434	0.00168104	0.14391	2.77442	0.0133929	RAMP1//SLC51B//CCL21
GO:0009888	tissue development	Biological process	40	1969	224	17653	1.60098	0.0017734	0.14831	2.75119	0.178571	MGP//ROR2//SFRP2//GLI3//SOX10//MEOX2//HAND2//CA2//MYH15//NRG1//ZFPM2//INSM1//IKZF3//HOXD9//FOXP2//GSTM3//SCEL//PHLDB2//TGFB1I1//GDF7//GPM6B//FGF10//KRT24//KRTAP1-1//EFEMP1//ASB2//PLN//MYH11//NEXN//MYO5A//EVC//BMP3//MYL2//MYOCD//C3ORF58//MEIS1//KLF2//HOXD13//RSPO3//POU3F3
GO:0050768	negative regulation of neurogenesis	Biological process	10	259	224	17653	3.04278	0.00179116	0.14831	2.74687	0.0446429	SOX10//LRRK2//NGFR//GLI3//TLX3//MEIS1//CNTN2//STAP1//NRG1//NEXMIF
GO:0090263	positive regulation of canonical Wnt signaling pathway	Biological process	7	137	224	17653	4.02669	0.00184112	0.14831	2.73492	0.03125	LRRK2//FGF10//ROR2//VPS35//SFRP2//RSPO3//SCEL
GO:0042063	gliogenesis	Biological process	10	260	224	17653	3.03108	0.0018426	0.14831	2.73457	0.0446429	MATN2//SOX10//ROR2//LGI4//NRG1//GLI3//ASPA//CNTN2//FGF10//STAP1
GO:0023052	signaling	Biological process	107	6724	224	17653	1.25408	0.00185976	0.14831	2.73054	0.477679	LRRK2//FGF10//NRG1//SPTB//GNG3//SFTPA2//CCL21//SFRP2//BMP3//SST//CTNND2//VPS35//TGFB1I1//RSPO3//ROR2//COL4A3BP//CHRNA3//CLIC1//FYB2//FCGR2B//GCG//HPGDS//GNAL//GPR27//IGFALS//FAS//KLRC3//MDK//ASB2//PNOC//DIRAS2//TNFRSF17//ARHGAP10//SPARCL1//TAAR5//CD69//CD79B//STAP1//ARHGEF4//KCTD9//PRKAR2B//TSPAN1//TNFRSF13B//EFEMP1//INSL5//RAMP1//RGS19//GNG7//GPR15//OR11G2//CCL28//RGS13//VIP//P2RY14//GRIA3//GRIK…
GO:0042592	homeostatic process	Biological process	36	1720	224	17653	1.64947	0.00186402	0.14831	2.72955	0.160714	TNFRSF13B//TNFRSF17//PRKAR2B//HCN4//TXNDC8//ARF1//CYBRD1//MT1A//PDK4//GNG3//CCL28//PLN//KCNJ2//KCNMA1//MYO5A//CA2//CA7//LRRK2//GCG//GPR27//KCNB1//NGFR//FABP4//PLA2G10//SFTPA2//KLF2//LMO1//POU3F3//JPH3//CCL21//TTPA//SLC26A3//SLC9A2//SCGN//CALB2//COL4A3BP
GO:0051239	regulation of multicellular organismal process	Biological process	55	2969	224	17653	1.4599	0.00189817	0.148481	2.72166	0.245536	FGF10//CHGA//MYL2//PLN//HCN4//GLI3//SOX10//TLX3//HAND2//CHRNA3//MYOCD//PHLDB2//TGFB1I1//SFRP2//MOB2//LRRK2//NGFR//KCNJ2//MGP//GPM6B//EVI2B//CNTN2//LGI4//NRG1//EFEMP1//DHX58//FCGR2B//KLF2//VNN1//PDK4//IKZF3//MEIS1//ROR2//KAT2B//GDF7//NAP1L2//CLIC1//CA2//ASPA//IL1R2//SCN11A//ZFPM2//FOXP2//HOXD13//ARF1//CACNG4//KCNJ5//MEOX2//LMO1//STAP1//VPS35//RSPO3//HPGDS//LIMS2//NEXMIF
GO:0099173	postsynapse organization	Biological process	6	102	224	17653	4.63577	0.00191007	0.148481	2.71895	0.0267857	CTNND2//LRRK2//ARF1//TMEM108//FCGR2B//VPS35
GO:0097061	dendritic spine organization	Biological process	5	70	224	17653	5.62915	0.00194908	0.148945	2.71017	0.0223214	CTNND2//LRRK2//FCGR2B//VPS35//ARF1
GO:0048468	cell development	Biological process	41	2045	224	17653	1.58001	0.00197465	0.148945	2.70451	0.183036	TXNDC8//SOX10//GLI3//SFRP2//HAND2//INSM1//GDF7//KIF5C//MATN2//NGFR//SPTB//CNTN2//PLA2G10//GSTM3//MOB2//LRRK2//ROR2//NRG1//ASPA//LGI4//LMOD1//MYH11//GPM6B//TMEM108//MEIS1//KLF2//TLX3//NAP1L2//SLC26A3//CCL21//NEXN//MYL2//CHRNA3//HOXD9//CTNND2//ARF1//EVI2B//TTPA//STAP1//NEXMIF//BMP3
GO:0030048	actin filament-based movement	Biological process	7	139	224	17653	3.96875	0.00199948	0.148945	2.69908	0.03125	MYL2//MYO5A//MLPH//KCNJ2//PLN//KCNJ5
GO:0060828	regulation of canonical Wnt signaling pathway	Biological process	10	263	224	17653	2.9965	0.00200413	0.148945	2.69807	0.0446429	GLI3//ROR2//SFRP2//SOX10//LRRK2//FGF10//VPS35//RSPO3//SCEL//CTNND2
GO:0048738	cardiac muscle tissue development	Biological process	9	221	224	17653	3.20938	0.00209966	0.153289	2.67785	0.0401786	NRG1//ZFPM2//MYH11//NEXN//MYL2//MYOCD//C3ORF58//MEIS1//PLN
GO:0007189	adenylate cyclase-activating G-protein coupled receptor signaling pathway	Biological process	6	104	224	17653	4.54662	0.00210792	0.153289	2.67615	0.0267857	GNAL//PLN//CHGA//RAMP1//GCG//VIP
GO:0048583	regulation of response to stimulus	Biological process	73	4243	224	17653	1.35588	0.00217649	0.154871	2.66224	0.325893	LRRK2//FGF10//GNG3//NRG1//FCGR2B//SFTPA2//C2//IGLL5//RAMP1//GNG7//C3ORF58//RGS19//ROR2//INSL5//GDF7//EFEMP1//GCG//IL16//MDK//PNOC//CCL28//CCL21//SFRP2//BMP3//SST//VIP//HAND2//STAP1//MMP28//CHRNA3//RGS13//VPS35//FYB2//HLA-DQB1//RSPO3//CFHR4//CDKN2B//TGFB1I1//MYOCD//MYO5A//ACAP3//FAS//ARHGEF4//ABRA//GPR27//GREM2//DHX58//NGFR//ERH//KAT2B//GLI3//EVC//FABP4//SLAMF7//CD1B//CLEC2B//CD79B//ARHGAP10//TMEM…
GO:0060548	negative regulation of cell death	Biological process	24	1005	224	17653	1.88198	0.00218465	0.154871	2.66062	0.107143	EVI2B//GCG//GLI3//FAS//TMIGD1//NGFR//ROR2//POU3F3//LIMS2//SOX10//ARHGAP10//SFRP2//MYOCD//HAND2//MDK//CHGA//LRRK2//VPS35//VNN1//CCL21//PDK4//FGF10//ZFPM2//TTPA
GO:0071375	cellular response to peptide hormone stimulus	Biological process	11	312	224	17653	2.77849	0.00219837	0.154871	2.6579	0.0491071	PDK4//MYO5A//CPEB1//KAT2B//CA2//TRARG1//GCG//GNG3//GNG7//PRKAR2B//NGFR
GO:0009713	catechol-containing compound biosynthetic process	Biological process	3	21	224	17653	11.2583	0.0022646	0.156281	2.64501	0.0133929	INSM1//VPS35//HAND2
GO:0042423	catecholamine biosynthetic process	Biological process	3	21	224	17653	11.2583	0.0022646	0.156281	2.64501	0.0133929	INSM1//VPS35//HAND2
GO:0048869	cellular developmental process	Biological process	74	4323	224	17653	1.34902	0.00230067	0.157085	2.63815	0.330357	COL4A3BP//KLF2//CDH19//NRG1//ZFPM2//MYOCD//BMP3//TXNDC8//SOX10//TLX3//MATN2//GLI3//SFRP2//TNFRSF13B//FCGR2B//ITM2A//HAND2//INSM1//GDF7//KIF5C//NGFR//SPTB//CNTN2//PLA2G10//GSTM3//CDC42EP1//PHLDB2//TGFB1I1//MOB2//LRRK2//ROR2//LGI4//ASPA//CFAP54//GPM6B//MDK//MGP//SPIB//FOXP2//CD79B//SCEL//CDKN2B//LMOD1//MYH11//MYO5A//EVI2B//TMEM108//KRT24//KRTAP1-1//EFEMP1//VNN1//MEIS1//ASB2//FGF10//MYL2//IKZF3//KAT…
GO:0003208	cardiac ventricle morphogenesis	Biological process	5	73	224	17653	5.39781	0.00234594	0.157085	2.62968	0.0223214	SFRP2//HAND2//ZFPM2//NRG1//MYL2
GO:0106027	neuron projection organization	Biological process	5	73	224	17653	5.39781	0.00234594	0.157085	2.62968	0.0223214	CTNND2//LRRK2//ARF1//FCGR2B//VPS35
GO:0051216	cartilage development	Biological process	8	184	224	17653	3.42644	0.0024582	0.162988	2.60938	0.0357143	MGP//ROR2//SFRP2//EFEMP1//GLI3//HAND2//EVC//BMP3
GO:1903018	regulation of glycoprotein metabolic process	Biological process	4	45	224	17653	7.00516	0.0025019	0.164275	2.60173	0.0178571	CCL21//ITM2A//RAMP1//SLC51B
GO:0030154	cell differentiation	Biological process	71	4124	224	17653	1.35678	0.0025354	0.164874	2.59595	0.316964	ZFPM2//MYOCD//BMP3//TXNDC8//SOX10//TLX3//MATN2//GLI3//SFRP2//TNFRSF13B//FCGR2B//ITM2A//HAND2//INSM1//GDF7//KIF5C//NGFR//SPTB//CNTN2//PLA2G10//GSTM3//PHLDB2//TGFB1I1//MOB2//LRRK2//ROR2//LGI4//NRG1//ASPA//CD79B//SCEL//CDKN2B//LMOD1//MYH11//MYO5A//EVI2B//GPM6B//TMEM108//KRT24//KRTAP1-1//EFEMP1//VNN1//MEIS1//ASB2//FGF10//MYL2//KLF2//IKZF3//KAT2B//MBNL3//NAP1L2//CLIC1//CA2//SLC26A3//CCL21//NEXN//CHRNA…
GO:0009966	regulation of signal transduction	Biological process	58	3215	224	17653	1.42173	0.00256839	0.16539	2.59034	0.258929	LRRK2//FGF10//GNG3//NRG1//RAMP1//GNG7//RGS19//ROR2//INSL5//GDF7//EFEMP1//FCGR2B//GCG//IL16//MDK//PNOC//CCL28//CCL21//SFRP2//BMP3//SST//VIP//C3ORF58//RGS13//VPS35//RSPO3//CDKN2B//TGFB1I1//MYOCD//MYO5A//ACAP3//FAS//ARHGEF4//ABRA//GREM2//DHX58//NGFR//ERH//KAT2B//GLI3//EVC//STAP1//ARHGAP10//TMEM108//CNTN2//PLN//JPH3//CTNND2//HAND2//CHP2//SOX10//SCEL//CHGA//GPR27//VNN1//CACNG4//IL1R2//LIMS2
GO:0030539	male genitalia development	Biological process	3	22	224	17653	10.7466	0.00259781	0.16539	2.58539	0.0133929	FGF10//HOXD13//ROR2
GO:0050806	positive regulation of synaptic transmission	Biological process	7	146	224	17653	3.77847	0.00263818	0.16539	2.5787	0.03125	CA2//CA7//RAB3B//CACNG4//ROR2//SCGN//CALB2
GO:0048522	positive regulation of cellular process	Biological process	85	5142	224	17653	1.30274	0.00264115	0.16539	2.57821	0.379464	LRRK2//FGF10//GNG3//NRG1//FAS//MOB2//GLI3//SOX10//FOXP2//MYOCD//NGFR//CHRNA3//KAT2B//POU3F3//CHP2//SFRP2//VIP//CCL21//KCNB1//TGFB1I1//PLA2G10//GCG//GDF7//BMP3//CNTN2//KLF2//ABRA//MDK//ROR2//HAND2//VPS35//RSPO3//INSM1//CDKN2B//RAMP1//CHGA//CDC42EP1//LMOD1//EVI2B//GUCA2B//HLA-DQB1//CA2//CA7//SYNPO2//LONRF2//VNN1//PRKAR2B//ARF1//GPR27//KCNMA1//ARHGEF4//NAP1L2//CLIC1//ERH//TSPAN1//EVC//IKZF3//ZFPM2//…
GO:0010557	positive regulation of macromolecule biosynthetic process	Biological process	35	1698	224	17653	1.62443	0.00278933	0.167227	2.5545	0.15625	MYOCD//KAT2B//CCL21//KLF2//ABRA//GDF7//FGF10//GLI3//MDK//ROR2//POU3F3//SOX10//TGFB1I1//HAND2//GCG//CDKN2B//IKZF3//ZFPM2//SSBP2//NRG1//HOXD9//HOXD13//LMO1//MEIS1//MEOX2//POU2AF1//EBF4//CHP2//SFRP2//SPIB//ASXL3//LRRK2//RAMP1//SLC51B//NGFR
GO:0051179	localization	Biological process	103	6497	224	17653	1.24938	0.00285362	0.167227	2.5446	0.459821	ABRA//FGF10//SOX10//TLX3//MATN2//ARF1//CCL21//CHGA//SCG3//HAND2//SLC36A1//RAB39B//ACAP3//MYO5A//CA2//KIF5C//SLC9A2//VAMP1//SYNGR1//CHRNA3//SLC26A3//HCN4//KCNJ2//KCNJ5//KCNMA1//SLC17A4//SCN11A//RAMP1//PLN//CLIC1//TCN2//AQP8//CFHR4//PLTP//RAB44//NGFR//VPS35//RAB3B//MLPH//SPTB//LRRK2//FCGR2B//TMEM108//LOXL4//KCNB1//IGLL5//NAAA//SYN2//GUCA2B//VIP//GCG//STAP1//MMP28//PLA2G10//NACAD//GPM6B//CHP2//CA1//…
GO:0045893	positive regulation of transcription, DNA-templated	Biological process	31	1450	224	17653	1.68486	0.00286852	0.167227	2.54234	0.138393	MYOCD//KAT2B//GCG//KLF2//CDKN2B//ABRA//FGF10//IKZF3//ZFPM2//SSBP2//GLI3//NRG1//HOXD9//HOXD13//LMO1//MEIS1//MEOX2//POU2AF1//POU3F3//EBF4//CHP2//SFRP2//SOX10//SPIB//ASXL3//HAND2//NGFR//GDF7//MDK//ROR2//TGFB1I1
GO:1903508	positive regulation of nucleic acid-templated transcription	Biological process	31	1450	224	17653	1.68486	0.00286852	0.167227	2.54234	0.138393	MYOCD//KAT2B//KLF2//ABRA//GDF7//FGF10//GLI3//MDK//ROR2//POU3F3//SOX10//TGFB1I1//HAND2//GCG//CDKN2B//IKZF3//ZFPM2//SSBP2//NRG1//HOXD9//HOXD13//LMO1//MEIS1//MEOX2//POU2AF1//EBF4//CHP2//SFRP2//SPIB//ASXL3//NGFR
GO:1902680	positive regulation of RNA biosynthetic process	Biological process	31	1451	224	17653	1.6837	0.00289846	0.167227	2.53783	0.138393	MYOCD//KAT2B//KLF2//ABRA//GDF7//FGF10//GLI3//MDK//ROR2//POU3F3//SOX10//TGFB1I1//HAND2//GCG//CDKN2B//IKZF3//ZFPM2//SSBP2//NRG1//HOXD9//HOXD13//LMO1//MEIS1//MEOX2//POU2AF1//EBF4//CHP2//SFRP2//SPIB//ASXL3//NGFR
GO:0035107	appendage morphogenesis	Biological process	7	149	224	17653	3.70239	0.00295555	0.167227	2.52936	0.03125	GLI3//HOXD9//HOXD13//ROR2//SFRP2//HAND2//FGF10
GO:0035108	limb morphogenesis	Biological process	7	149	224	17653	3.70239	0.00295555	0.167227	2.52936	0.03125	HOXD9//GLI3//HOXD13//ROR2//SFRP2//HAND2//FGF10
GO:0021544	subpallium development	Biological process	3	23	224	17653	10.2793	0.00295975	0.167227	2.52875	0.0133929	LRRK2//FOXP2//GLI3
GO:0030318	melanocyte differentiation	Biological process	3	23	224	17653	10.2793	0.00295975	0.167227	2.52875	0.0133929	GLI3//MYO5A//SOX10
GO:1903020	positive regulation of glycoprotein metabolic process	Biological process	3	23	224	17653	10.2793	0.00295975	0.167227	2.52875	0.0133929	CCL21//RAMP1//SLC51B
GO:2000177	regulation of neural precursor cell proliferation	Biological process	5	77	224	17653	5.1174	0.00296255	0.167227	2.52833	0.0223214	GLI3//SOX10//LRRK2//LIMS2//INSM1
GO:0050789	regulation of biological process	Biological process	168	11709	224	17653	1.13073	0.00298166	0.167227	2.52554	0.75	CDKN2B//KLF2//ZFPM2//GLI3//HOXD9//INSM1//LMO1//MYOCD//FOXP2//LRRK2//FGF10//NRG1//SPTB//GNG3//MBNL3//FCGR2B//FAS//MOB2//NEXMIF//CCL28//CCL21//CHGA//MYL2//PLN//HCN4//SOX10//TLX3//ARF1//SFTPA2//HAND2//CLIC1//TRIM36//C2//CTNND2//VPS35//TGFB1I1//RSPO3//ROR2//COL4A3BP//CHRNA3//FYB2//GCG//HPGDS//GNAL//GPR27//IGFALS//KLRC3//MDK//ASB2//PNOC//DIRAS2//TNFRSF17//ARHGAP10//SPARCL1//TAAR5//CD69//CD79B//STAP1//…
GO:0051961	negative regulation of nervous system development	Biological process	10	278	224	17653	2.83482	0.00299194	0.167227	2.52405	0.0446429	SOX10//LRRK2//NGFR//GLI3//TLX3//MEIS1//CNTN2//STAP1//NRG1//NEXMIF
GO:0042221	response to chemical	Biological process	78	4655	224	17653	1.32052	0.00303157	0.168053	2.51833	0.348214	CCL21//CHGA//HSPB2//CMBL//CCL28//GDF7//GLI3//KIF5C//MATN2//NGFR//SPTB//CNTN2//PLA2G10//SFRP2//SST//C2//TTPA//PDK4//FGF10//SCN11A//NPC1L1//MDK//KDM5C//MT1A//CYBRD1//PLN//CA2//STAP1//MMP28//CHRNA3//SLC36A1//TCN2//IL16//GREM2//IL1R2//NRG1//CPEB1//ROR2//BMP3//CDKN2B//TGFB1I1//MYOCD//FAS//MYO5A//KAT2B//RAMP1//TNFRSF13B//TNFRSF17//HOXD13//FOXP2//KCNMA1//LRRK2//TXNDC8//CD69//ARF1//CA1//GCG//GPR27//GSTM3…
GO:0048856	anatomical structure development	Biological process	94	5836	224	17653	1.26935	0.00311193	0.170125	2.50697	0.419643	COL4A3BP//KLF2//CDH19//NRG1//EVC//HOXD13//BMP3//MGP//ROR2//RAMP1//FGF10//MEIS1//MEOX2//HAND2//DMRTA1//SFRP2//ZFPM2//MYOCD//GLI3//TXNDC8//SOX10//TLX3//MATN2//CA2//TTPA//LOXL4//RSPO3//MYH15//TNFRSF13B//FCGR2B//ITM2A//INSM1//SHISA3//FAS//NGFR//MBNL3//EBF4//TNFRSF17//FOXP2//ASXL3//BPNT1//CHRNA3//GPM6B//GRIK1//MDK//GDF7//KIF5C//SPTB//CNTN2//PLA2G10//POU3F3//IKZF3//GYS1//MYL2//KAT2B//HOXD9//GSTM3//LRRK…
GO:0007154	cell communication	Biological process	106	6744	224	17653	1.23868	0.00316775	0.170125	2.49925	0.473214	LRRK2//FGF10//NRG1//SPTB//GNG3//MYOCD//SFTPA2//CCL21//SFRP2//BMP3//SST//CTNND2//VPS35//TGFB1I1//RSPO3//ROR2//COL4A3BP//CHRNA3//CLIC1//FYB2//FCGR2B//GCG//HPGDS//GNAL//GPR27//IGFALS//FAS//KLRC3//MDK//ASB2//PNOC//DIRAS2//TNFRSF17//ARHGAP10//SPARCL1//TAAR5//CD69//CD79B//STAP1//ARHGEF4//KCTD9//PRKAR2B//TSPAN1//TNFRSF13B//EFEMP1//INSL5//RAMP1//RGS19//GNG7//GPR15//OR11G2//CCL28//RGS13//VIP//P2RY14//GRIA…
GO:0050793	regulation of developmental process	Biological process	48	2563	224	17653	1.47592	0.00317728	0.170125	2.49794	0.214286	FGF10//GLI3//SOX10//HAND2//CDC42EP1//PHLDB2//TGFB1I1//SFRP2//PLA2G10//MYOCD//MOB2//LRRK2//NGFR//MGP//GPM6B//EVI2B//CNTN2//LGI4//NRG1//EFEMP1//VNN1//IKZF3//INSM1//ZFPM2//MEIS1//ROR2//KAT2B//MBNL3//TLX3//GDF7//NAP1L2//CLIC1//CA2//ASPA//CHRNA3//FOXP2//HOXD13//ARF1//MEOX2//VPS35//TTPA//LMO1//KLF2//STAP1//RSPO3//LIMS2//FCGR2B//NEXMIF
GO:0034762	regulation of transmembrane transport	Biological process	15	529	224	17653	2.23463	0.00318423	0.170125	2.49699	0.0669643	PLN//MYO5A//HCN4//SCN11A//CLIC1//KCNB1//KCNJ2//KCNJ5//KCNMA1//JPH3//ARF1//CACNG4//CA2//PIRT//NGFR
GO:0042552	myelination	Biological process	6	113	224	17653	4.1845	0.00319548	0.170125	2.49546	0.0267857	ASPA//SOX10//CNTN2//LGI4//NRG1//MYO5A
GO:0009891	positive regulation of biosynthetic process	Biological process	37	1841	224	17653	1.58387	0.00321987	0.170125	2.49216	0.165179	MYOCD//KAT2B//CCL21//KLF2//ABRA//GDF7//FGF10//GLI3//MDK//ROR2//POU3F3//SOX10//TGFB1I1//HAND2//RAMP1//GUCA2B//GCG//CDKN2B//IKZF3//ZFPM2//SSBP2//NRG1//HOXD9//HOXD13//LMO1//MEIS1//MEOX2//POU2AF1//EBF4//CHP2//SFRP2//SPIB//ASXL3//LRRK2//SLC51B//NGFR//VPS35
GO:0044057	regulation of system process	Biological process	15	534	224	17653	2.21371	0.00347543	0.179934	2.45899	0.0669643	CHGA//MYL2//PLN//HCN4//TLX3//CHRNA3//MYOCD//HAND2//KCNJ2//NRG1//SOX10//FGF10//SCN11A//CACNG4//KCNJ5
GO:0007272	ensheathment of neurons	Biological process	6	115	224	17653	4.11172	0.00348533	0.179934	2.45776	0.0267857	NRG1//ASPA//SOX10//CNTN2//LGI4//MYO5A
GO:0008366	axon ensheathment	Biological process	6	115	224	17653	4.11172	0.00348533	0.179934	2.45776	0.0267857	ASPA//SOX10//CNTN2//LGI4//NRG1//MYO5A
GO:0003008	system process	Biological process	41	2113	224	17653	1.52917	0.00358079	0.183461	2.44602	0.183036	NRG1//CHGA//MYL2//PLN//HCN4//TLX3//PRKAR2B//COL4A3BP//LMOD1//MYH11//CALD1//CHRNA3//SLC26A3//GUCA2B//POU3F3//PNOC//EFEMP1//MYO5A//RLBP1//GNAL//TAAR5//JPH3//CNTN2//MDK//MEOX2//MYOCD//HAND2//KCNJ2//CACNG4//SCN11A//NPC1L1//SYNM//SOX10//FOXP2//FGF10//PTCHD1//OR11G2//LXN//KCNMA1//KCNJ5//FABP2
GO:0061448	connective tissue development	Biological process	9	240	224	17653	2.9553	0.0036395	0.185067	2.43896	0.0401786	MGP//ROR2//SFRP2//EFEMP1//GLI3//EVC//BMP3//HAND2//GDF7
GO:0010001	glial cell differentiation	Biological process	8	197	224	17653	3.20033	0.00373088	0.188298	2.42819	0.0357143	ROR2//SOX10//NRG1//GLI3//ASPA//CNTN2//LGI4//FGF10
GO:0001763	morphogenesis of a branching structure	Biological process	8	198	224	17653	3.18416	0.00384659	0.192434	2.41492	0.0357143	SFRP2//GLI3//GDF7//FGF10//HOXD13//RSPO3//SOX10//LRRK2
GO:0006935	chemotaxis	Biological process	16	594	224	17653	2.12278	0.00386973	0.192434	2.41232	0.0714286	CCL21//CHGA//GDF7//GLI3//KIF5C//MATN2//NGFR//SPTB//CNTN2//PLA2G10//STAP1//MMP28//NRG1//IL16//FGF10//CCL28
GO:0042330	taxis	Biological process	16	595	224	17653	2.11921	0.00393269	0.193847	2.40531	0.0714286	CCL21//CHGA//CCL28//GDF7//GLI3//KIF5C//MATN2//NGFR//SPTB//CNTN2//PLA2G10//STAP1//MMP28//NRG1//IL16//FGF10
GO:0033762	response to glucagon	Biological process	4	51	224	17653	6.18102	0.00395547	0.193847	2.4028	0.0178571	GCG//GNG3//GNG7//PRKAR2B
GO:0065008	regulation of biological quality	Biological process	65	3770	224	17653	1.35876	0.00402274	0.195725	2.39548	0.290179	KCNB1//TNFRSF13B//CHGA//MYL2//PLN//HCN4//TNFRSF17//PRKAR2B//ZFPM2//TXNDC8//ARF1//CYBRD1//MT1A//PDK4//GNG3//CCL28//NAAA//SYN2//GUCA2B//VIP//GCG//CDC42EP1//PLA2G10//CHRNA3//KCNJ2//TSPAN1//SCN11A//KCNMA1//MYO5A//LMOD1//CCL21//CNTN2//SLC51B//VPS35//CA2//CA7//LRRK2//GPR27//SLC26A3//NGFR//FABP4//SFTPA2//KLF2//NRG1//LMO1//FGF10//JPH3//SYNGR1//POU3F3//TTPA//SLC9A2//SCGN//CALB2//RAB3B//GPM6B//SPTB//CLIC1/…
GO:1901652	response to peptide	Biological process	14	491	224	17653	2.24707	0.00412294	0.197907	2.38479	0.0625	PDK4//PLN//MYO5A//CPEB1//KAT2B//CA2//TRARG1//GCG//GNG3//GNG7//PRKAR2B//KLF2//FCGR2B//NGFR
GO:0032502	developmental process	Biological process	99	6267	224	17653	1.24493	0.0042245	0.197907	2.37422	0.441964	COL4A3BP//KLF2//CDH19//NRG1//EVC//HOXD13//BMP3//MGP//ROR2//RAMP1//FGF10//MEIS1//MEOX2//HAND2//DMRTA1//SFRP2//ZFPM2//MYOCD//GLI3//TXNDC8//SOX10//TLX3//MATN2//CA2//TTPA//LOXL4//RSPO3//MYH15//TNFRSF13B//FCGR2B//ITM2A//INSM1//SHISA3//FAS//NGFR//MBNL3//EBF4//TNFRSF17//FOXP2//ASXL3//BPNT1//CHRNA3//GPM6B//GRIK1//MDK//GDF7//KIF5C//SPTB//CNTN2//PLA2G10//POU3F3//IKZF3//GYS1//MYL2//KAT2B//HOXD9//GSTM3//LRRK…
GO:0030511	positive regulation of transforming growth factor beta receptor signaling pathway	Biological process	3	26	224	17653	9.09323	0.00422544	0.197907	2.37413	0.0133929	CDKN2B//TGFB1I1//MYOCD
GO:0060571	morphogenesis of an epithelial fold	Biological process	3	26	224	17653	9.09323	0.00422544	0.197907	2.37413	0.0133929	FGF10//GDF7//HOXD13
GO:1903846	positive regulation of cellular response to transforming growth factor beta stimulus	Biological process	3	26	224	17653	9.09323	0.00422544	0.197907	2.37413	0.0133929	CDKN2B//TGFB1I1//MYOCD
GO:0050766	positive regulation of phagocytosis	Biological process	4	52	224	17653	6.06216	0.00424316	0.197907	2.37231	0.0178571	STAP1//C2//FCGR2B//SFTPA2
GO:0048513	animal organ development	Biological process	60	3428	224	17653	1.37937	0.0042836	0.198424	2.36819	0.267857	MGP//ROR2//DMRTA1//FGF10//GLI3//SOX10//CA2//TTPA//HAND2//SFRP2//MYH15//MEIS1//TNFRSF13B//FCGR2B//ITM2A//COL4A3BP//ZFPM2//NRG1//MYOCD//INSM1//ASXL3//GYS1//MYL2//KAT2B//EVC//HOXD9//MEOX2//FOXP2//PHLDB2//TGFB1I1//GDF7//MDK//TMEM108//LRRK2//PTCHD1//POU3F3//CNTN2//CD79B//SCEL//CDKN2B//GPM6B//HOXD13//EVI2B//KRT24//KRTAP1-1//EFEMP1//VNN1//ASB2//MYO5A//KLF2//IKZF3//PLN//MYH11//NEXN//BMP3//C3ORF58//MFAP5/…
GO:0019932	second-messenger-mediated signaling	Biological process	11	342	224	17653	2.53476	0.00441508	0.202261	2.35506	0.0491071	RAMP1//GCG//GNAL//VIP//LRRK2//PLN//MYO5A//JPH3//NRG1//CHP2//CHGA
GO:0031328	positive regulation of cellular biosynthetic process	Biological process	36	1812	224	17653	1.56572	0.00442624	0.202261	2.35396	0.160714	MYOCD//KAT2B//CCL21//KLF2//ABRA//GDF7//FGF10//GLI3//MDK//ROR2//POU3F3//SOX10//TGFB1I1//HAND2//RAMP1//GUCA2B//GCG//CDKN2B//IKZF3//ZFPM2//SSBP2//NRG1//HOXD9//HOXD13//LMO1//MEIS1//MEOX2//POU2AF1//EBF4//CHP2//SFRP2//SPIB//ASXL3//SLC51B//NGFR//VPS35
GO:0003231	cardiac ventricle development	Biological process	6	121	224	17653	3.90784	0.00447262	0.203009	2.34944	0.0267857	SFRP2//HAND2//ZFPM2//NRG1//MYL2//MYOCD
GO:0007507	heart development	Biological process	15	550	224	17653	2.14931	0.00455791	0.205491	2.34123	0.0669643	HAND2//COL4A3BP//ZFPM2//SFRP2//NRG1//MYOCD//PLN//MYH11//NEXN//MYL2//C3ORF58//MEIS1//GLI3//GYS1//KAT2B
GO:0051050	positive regulation of transport	Biological process	22	947	224	17653	1.83081	0.00460726	0.205491	2.33656	0.0982143	KCNB1//PLTP//PLA2G10//LRRK2//GCG//GPR27//GLI3//CHP2//TSPAN1//ARF1//CCL21//FCGR2B//SFTPA2//RAB3B//STAP1//VPS35//SLC51B//KCNJ2//NRG1//C2//CA2//PIRT
GO:0030336	negative regulation of cell migration	Biological process	10	296	224	17653	2.66243	0.00465342	0.205491	2.33223	0.0446429	STAP1//MMP28//MEOX2//CCL28//CCL21//PHLDB2//MYOCD//NRG1//NEXMIF//SFRP2
GO:0034765	regulation of ion transmembrane transport	Biological process	13	446	224	17653	2.2971	0.00469524	0.205491	2.32834	0.0580357	PLN//MYO5A//KCNJ2//JPH3//ARF1//CACNG4//PIRT//HCN4//SCN11A//CLIC1//KCNB1//KCNJ5//KCNMA1
GO:0002026	regulation of the force of heart contraction	Biological process	3	27	224	17653	8.75645	0.0047096	0.205491	2.32702	0.0133929	PLN//MYL2//CHGA
GO:1902692	regulation of neuroblast proliferation	Biological process	3	27	224	17653	8.75645	0.0047096	0.205491	2.32702	0.0133929	GLI3//SOX10//LRRK2
GO:0070887	cellular response to chemical stimulus	Biological process	56	3175	224	17653	1.39	0.00508816	0.220585	2.29344	0.25	CCL21//CHGA//CMBL//PDK4//FGF10//SST//STAP1//MMP28//IL16//GREM2//IL1R2//CPEB1//GDF7//ROR2//BMP3//CDKN2B//TGFB1I1//MYOCD//SFRP2//MYO5A//KAT2B//RAMP1//TNFRSF13B//FAS//NGFR//TNFRSF17//LRRK2//TXNDC8//CD69//ARF1//CA1//GCG//GPR27//CA2//GSTM3//TRARG1//TMEM108//CCL28//HLA-DQB1//KLF2//MT1A//CHP2//FABP4//HCN4//SLC26A3//AQP8//KCNB1//GNG3//GNG7//PRKAR2B//SOX10//CHRNA3//VNN1//FCGR2B//PLA2G10//SYNGR1
GO:0006937	regulation of muscle contraction	Biological process	7	165	224	17653	3.34337	0.00516861	0.221236	2.28663	0.03125	CHRNA3//MYL2//MYOCD//PLN//KCNJ2//HCN4//CHGA
GO:0048469	cell maturation	Biological process	7	165	224	17653	3.34337	0.00516861	0.221236	2.28663	0.03125	LRRK2//LGI4//KLF2//CNTN2//SLC26A3//CCL21//SOX10
GO:0006810	transport	Biological process	82	5048	224	17653	1.28016	0.00545733	0.232125	2.26302	0.366071	ABRA//ARF1//SCG3//SLC36A1//RAB39B//ACAP3//MYO5A//CA2//VAMP1//SYNGR1//CHRNA3//SLC26A3//SLC9A2//HCN4//KCNJ2//KCNJ5//KCNMA1//SLC17A4//SCN11A//RAMP1//PLN//CLIC1//TCN2//AQP8//CFHR4//PLTP//RAB44//NGFR//VPS35//RAB3B//MLPH//SPTB//LRRK2//FCGR2B//TMEM108//LOXL4//KCNB1//IGLL5//NAAA//SYN2//GUCA2B//VIP//GCG//NACAD//GPM6B//CHP2//CA1//CA4//CA7//SLC51B//SLC28A2//TTPA//NPC1L1//KIF5C//CNTN2//PLA2G10//CHGA//GRIA3//…
GO:0048709	oligodendrocyte differentiation	Biological process	5	89	224	17653	4.42742	0.00550877	0.232497	2.25895	0.0223214	SOX10//ASPA//CNTN2//GLI3//NRG1
GO:0033627	cell adhesion mediated by integrin	Biological process	4	56	224	17653	5.62915	0.00553482	0.232497	2.2569	0.0178571	NEXMIF//CCL21//SFRP2//FYB2
GO:0050808	synapse organization	Biological process	10	304	224	17653	2.59237	0.00559282	0.233483	2.25237	0.0446429	NRG1//LRRK2//CTNND2//ARF1//CNTN2//TMEM108//FCGR2B//VPS35//RAB39B//MYO5A
GO:0048167	regulation of synaptic plasticity	Biological process	7	168	224	17653	3.28367	0.00569401	0.236249	2.24458	0.03125	JPH3//CNTN2//SYNGR1//ARF1//SCGN//CALB2//KCNB1
GO:0008285	negative regulation of cell proliferation	Biological process	18	732	224	17653	1.9379	0.00575401	0.237283	2.24003	0.0803571	SOX10//FCGR2B//TNFRSF13B//CDKN2B//SFRP2//MEIS1//NGFR//MYOCD//LIMS2//HPGDS//DPT//FGF10//GLI3//INSM1//ROR2//SST//TGFB1I1//KAT2B
GO:0009967	positive regulation of signal transduction	Biological process	32	1586	224	17653	1.59007	0.00584938	0.238543	2.23289	0.142857	LRRK2//FGF10//GNG3//NRG1//GDF7//BMP3//VPS35//RSPO3//CDKN2B//TGFB1I1//MYOCD//ABRA//CCL21//FAS//NGFR//ROR2//ERH//KAT2B//EVC//FCGR2B//STAP1//TMEM108//CNTN2//GCG//HAND2//CHP2//SFRP2//SCEL//DHX58//CHGA//GPR27//LIMS2
GO:0051254	positive regulation of RNA metabolic process	Biological process	31	1523	224	17653	1.6041	0.0058887	0.238543	2.22998	0.138393	MYOCD//KAT2B//KLF2//ABRA//GDF7//FGF10//GLI3//MDK//ROR2//POU3F3//SOX10//TGFB1I1//HAND2//GCG//CDKN2B//IKZF3//ZFPM2//SSBP2//NRG1//HOXD9//HOXD13//LMO1//MEIS1//MEOX2//POU2AF1//EBF4//CHP2//SFRP2//SPIB//ASXL3//NGFR
GO:0051716	cellular response to stimulus	Biological process	115	7556	224	17653	1.19943	0.00589038	0.238543	2.22986	0.513393	LRRK2//FGF10//NRG1//SPTB//GNG3//MYOCD//SFTPA2//CCL21//CHGA//CTNND2//VPS35//TGFB1I1//RSPO3//ROR2//COL4A3BP//CHRNA3//CLIC1//FYB2//FCGR2B//GCG//HPGDS//GNAL//GPR27//IGFALS//FAS//KLRC3//MDK//ASB2//PNOC//DIRAS2//TNFRSF17//ARHGAP10//SPARCL1//TAAR5//CD69//CD79B//STAP1//ARHGEF4//KCTD9//PRKAR2B//CMBL//TSPAN1//TNFRSF13B//SST//EFEMP1//INSL5//RAMP1//RGS19//GNG7//GPR15//OR11G2//CCL28//RGS13//SFRP2//VIP//P2RY14…
GO:0030326	embryonic limb morphogenesis	Biological process	6	129	224	17653	3.66549	0.00609181	0.24268	2.21525	0.0267857	HOXD9//GLI3//HOXD13//ROR2//SFRP2//HAND2
GO:0035113	embryonic appendage morphogenesis	Biological process	6	129	224	17653	3.66549	0.00609181	0.24268	2.21525	0.0267857	HOXD9//GLI3//HOXD13//ROR2//SFRP2//HAND2
GO:0045165	cell fate commitment	Biological process	9	260	224	17653	2.72797	0.00610019	0.24268	2.21466	0.0401786	GLI3//NRG1//SFRP2//FGF10//MYL2//TLX3//GDF7//ROR2//TGFB1I1
GO:0030177	positive regulation of Wnt signaling pathway	Biological process	7	171	224	17653	3.22606	0.00625841	0.247518	2.20354	0.03125	LRRK2//FGF10//ROR2//VPS35//SFRP2//RSPO3//SCEL
GO:0006942	regulation of striated muscle contraction	Biological process	5	92	224	17653	4.28305	0.00633098	0.248933	2.19853	0.0223214	PLN//KCNJ2//HCN4//CHGA//MYL2
GO:2000146	negative regulation of cell motility	Biological process	10	311	224	17653	2.53402	0.00653109	0.254578	2.18501	0.0446429	STAP1//MMP28//SFRP2//MEOX2//CCL28//CCL21//PHLDB2//MYOCD//NRG1//NEXMIF
GO:0051234	establishment of localization	Biological process	83	5155	224	17653	1.26888	0.00654985	0.254578	2.18377	0.370536	ABRA//FGF10//ARF1//SCG3//SLC36A1//RAB39B//ACAP3//MYO5A//CA2//VAMP1//SYNGR1//CHRNA3//SLC26A3//SLC9A2//HCN4//KCNJ2//KCNJ5//KCNMA1//SLC17A4//SCN11A//RAMP1//PLN//CLIC1//TCN2//AQP8//CFHR4//PLTP//RAB44//NGFR//VPS35//RAB3B//MLPH//SPTB//LRRK2//FCGR2B//TMEM108//LOXL4//KCNB1//IGLL5//NAAA//SYN2//GUCA2B//VIP//GCG//NACAD//GPM6B//CHP2//CA1//CA4//CA7//SLC51B//SLC28A2//TTPA//NPC1L1//KIF5C//CNTN2//PLA2G10//CHGA//…
GO:0009725	response to hormone	Biological process	22	977	224	17653	1.77459	0.00658902	0.254638	2.18118	0.0982143	PDK4//SST//TGFB1I1//FGF10//PLN//MYO5A//CPEB1//KAT2B//RAMP1//HOXD13//FOXP2//CCL21//CA2//TRARG1//MDK//GCG//GNG3//GNG7//PRKAR2B//SOX10//CHRNA3//NGFR
GO:0060159	regulation of dopamine receptor signaling pathway	Biological process	2	10	224	17653	15.7616	0.00674533	0.256285	2.171	0.00892857	LRRK2//VPS35
GO:1902950	regulation of dendritic spine maintenance	Biological process	2	10	224	17653	15.7616	0.00674533	0.256285	2.171	0.00892857	FCGR2B//VPS35
GO:2001225	regulation of chloride transport	Biological process	2	10	224	17653	15.7616	0.00674533	0.256285	2.171	0.00892857	CA2//CA7
GO:0007165	signal transduction	Biological process	97	6210	224	17653	1.23098	0.00688735	0.257715	2.16195	0.433036	LRRK2//FGF10//NRG1//SPTB//GNG3//SFTPA2//CTNND2//VPS35//TGFB1I1//RSPO3//ROR2//STAP1//ARHGEF4//ASB2//KCTD9//PRKAR2B//TSPAN1//TNFRSF13B//SST//CHRNA3//EFEMP1//INSL5//RAMP1//RGS19//GCG//GNG7//GPR15//GPR27//OR11G2//PNOC//CCL28//RGS13//CCL21//SFRP2//VIP//TAAR5//P2RY14//GNAL//GRIA3//GRIK1//KCNB1//MDK//PLN//KAT2B//PTCHD1//EVC//GLI3//CDC42EP1//NGFR//PDK4//C3ORF58//GDF7//FCGR2B//IL16//BMP3//GREM2//IL1R2//FY…
GO:0021782	glial cell development	Biological process	5	94	224	17653	4.19192	0.00692475	0.257715	2.1596	0.0223214	ROR2//SOX10//ASPA//CNTN2//LGI4
GO:0003401	axis elongation	Biological process	3	31	224	17653	7.62658	0.00697351	0.257715	2.15655	0.0133929	SFRP2//FGF10//HOXD13
GO:0042307	positive regulation of protein import into nucleus	Biological process	3	31	224	17653	7.62658	0.00697351	0.257715	2.15655	0.0133929	LRRK2//GLI3//CHP2
GO:0045736	negative regulation of cyclin-dependent protein serine/threonine kinase activity	Biological process	3	31	224	17653	7.62658	0.00697351	0.257715	2.15655	0.0133929	CDKN2B//KAT2B//MYOCD
GO:0048565	digestive tract development	Biological process	6	133	224	17653	3.55525	0.00704477	0.258934	2.15213	0.0267857	GLI3//SFRP2//SOX10//FGF10//HOXD13//MYOCD
GO:0035249	synaptic transmission, glutamatergic	Biological process	5	95	224	17653	4.14779	0.00723577	0.262569	2.14052	0.0223214	LRRK2//GRIK1//CACNG4//ROR2//GRIA3
GO:0030900	forebrain development	Biological process	11	366	224	17653	2.36855	0.00724103	0.262569	2.1402	0.0491071	MDK//TMEM108//LRRK2//FOXP2//GLI3//PTCHD1//POU3F3//NRG1//CNTN2//FGF10//GDF7
GO:0006941	striated muscle contraction	Biological process	7	176	224	17653	3.13441	0.00729045	0.262569	2.13725	0.03125	MYL2//PLN//KCNJ2//SYNM//HCN4//CHGA//KCNJ5
GO:0007586	digestion	Biological process	6	134	224	17653	3.52872	0.00729896	0.262569	2.13674	0.0267857	NPC1L1//SI//FGF10//FABP2//GUCA2B//SST
GO:0045935	positive regulation of nucleobase-containing compound metabolic process	Biological process	34	1742	224	17653	1.53816	0.00742243	0.26305	2.12945	0.151786	MYOCD//KAT2B//KLF2//ABRA//GDF7//FGF10//GLI3//MDK//ROR2//POU3F3//SOX10//TGFB1I1//HAND2//RAMP1//CHGA//GUCA2B//GCG//CDKN2B//IKZF3//ZFPM2//SSBP2//NRG1//HOXD9//HOXD13//LMO1//MEIS1//MEOX2//POU2AF1//EBF4//CHP2//SFRP2//SPIB//ASXL3//NGFR
GO:0006812	cation transport	Biological process	24	1109	224	17653	1.70549	0.00742487	0.26305	2.12931	0.107143	KCNJ2//KCNJ5//KCNMA1//SLC17A4//SCN11A//RAMP1//PLN//TCN2//CHRNA3//SLC36A1//MYO5A//HCN4//JPH3//CCL21//RAB3B//GPM6B//IL16//CACNG4//KCNB1//SLC9A2//GCG//ARF1//C15ORF48//PIRT
GO:0060070	canonical Wnt signaling pathway	Biological process	10	317	224	17653	2.48606	0.00742902	0.26305	2.12907	0.0446429	LRRK2//CTNND2//GLI3//ROR2//SFRP2//SOX10//FGF10//VPS35//RSPO3//SCEL
GO:0060048	cardiac muscle contraction	Biological process	6	135	224	17653	3.50258	0.00755972	0.265774	2.12149	0.0267857	PLN//HCN4//CHGA//KCNJ2//KCNJ5//MYL2
GO:0009954	proximal/distal pattern formation	Biological process	3	32	224	17653	7.38825	0.00762387	0.265774	2.11782	0.0133929	FGF10//GLI3//HOXD9
GO:0090075	relaxation of muscle	Biological process	3	32	224	17653	7.38825	0.00762387	0.265774	2.11782	0.0133929	KCNJ2//PLN//CHGA
GO:0061061	muscle structure development	Biological process	16	640	224	17653	1.9702	0.00777035	0.269492	2.10956	0.0714286	MYH15//ZFPM2//NRG1//MYOCD//EVC//HOXD9//MEOX2//FOXP2//LMOD1//MYH11//ASB2//FGF10//MYL2//MBNL3//NEXN//MEIS1
GO:0090092	regulation of transmembrane receptor protein serine/threonine kinase signaling pathway	Biological process	8	225	224	17653	2.80206	0.00815793	0.271041	2.08842	0.0357143	GDF7//BMP3//CDKN2B//TGFB1I1//MYOCD//SFRP2//FGF10//GREM2
GO:0010172	embryonic body morphogenesis	Biological process	2	11	224	17653	14.3287	0.00817573	0.271041	2.08747	0.00892857	PHLDB2//GREM2
GO:0031987	locomotion involved in locomotory behavior	Biological process	2	11	224	17653	14.3287	0.00817573	0.271041	2.08747	0.00892857	VPS35//MYO5A
GO:0045722	positive regulation of gluconeogenesis	Biological process	2	11	224	17653	14.3287	0.00817573	0.271041	2.08747	0.00892857	GCG//KAT2B
GO:0060379	cardiac muscle cell myoblast differentiation	Biological process	2	11	224	17653	14.3287	0.00817573	0.271041	2.08747	0.00892857	MYOCD//NRG1
GO:0070050	neuron cellular homeostasis	Biological process	2	11	224	17653	14.3287	0.00817573	0.271041	2.08747	0.00892857	SCGN//CALB2
GO:0099515	actin filament-based transport	Biological process	2	11	224	17653	14.3287	0.00817573	0.271041	2.08747	0.00892857	MYO5A//MLPH
GO:1904995	negative regulation of leukocyte adhesion to vascular endothelial cell	Biological process	2	11	224	17653	14.3287	0.00817573	0.271041	2.08747	0.00892857	CCL28//CCL21
GO:2001223	negative regulation of neuron migration	Biological process	2	11	224	17653	14.3287	0.00817573	0.271041	2.08747	0.00892857	NRG1//NEXMIF
GO:0034220	ion transmembrane transport	Biological process	24	1119	224	17653	1.69025	0.0082518	0.271242	2.08345	0.107143	SLC36A1//KCNJ2//KCNJ5//PLN//MYO5A//HCN4//SCN11A//CLIC1//KCNB1//KCNMA1//SLC17A4//JPH3//CCL21//CACNG4//SLC9A2//CHRNA3//ARF1//SLC26A3//BEST3//C15ORF48//PIRT//GRIA3//GRIK1//AQP8
GO:0050931	pigment cell differentiation	Biological process	3	33	224	17653	7.16437	0.00830889	0.271242	2.08046	0.0133929	GLI3//MYO5A//SOX10
GO:1904030	negative regulation of cyclin-dependent protein kinase activity	Biological process	3	33	224	17653	7.16437	0.00830889	0.271242	2.08046	0.0133929	CDKN2B//KAT2B//MYOCD
GO:0050794	regulation of cellular process	Biological process	158	11074	224	17653	1.12441	0.00834756	0.271242	2.07844	0.705357	CDKN2B//KLF2//ZFPM2//GLI3//HOXD9//INSM1//LMO1//MYOCD//FOXP2//LRRK2//FGF10//NRG1//SPTB//GNG3//MBNL3//FAS//MOB2//NEXMIF//SOX10//ARF1//SFTPA2//HCN4//HAND2//CLIC1//TRIM36//CTNND2//VPS35//TGFB1I1//RSPO3//ROR2//COL4A3BP//CHRNA3//FYB2//FCGR2B//GCG//HPGDS//GNAL//GPR27//IGFALS//KLRC3//MDK//ASB2//PNOC//DIRAS2//TNFRSF17//ARHGAP10//SPARCL1//TAAR5//CD69//CD79B//STAP1//ARHGEF4//KCTD9//PRKAR2B//TXNDC8//ZNF57//S…
GO:0061351	neural precursor cell proliferation	Biological process	6	138	224	17653	3.42644	0.00838232	0.271242	2.07664	0.0267857	GLI3//SOX10//POU3F3//LRRK2//LIMS2//INSM1
GO:0051960	regulation of nervous system development	Biological process	19	820	224	17653	1.82604	0.00849338	0.273527	2.07092	0.0848214	GLI3//SOX10//SFRP2//MOB2//LRRK2//NGFR//CNTN2//LGI4//NRG1//TLX3//MEIS1//GDF7//NAP1L2//ASPA//CHRNA3//ARF1//STAP1//VPS35//NEXMIF
GO:0043434	response to peptide hormone	Biological process	12	427	224	17653	2.21475	0.00856365	0.274288	2.06734	0.0535714	PDK4//PLN//MYO5A//CPEB1//KAT2B//CA2//TRARG1//GCG//GNG3//GNG7//PRKAR2B//NGFR
GO:0098660	inorganic ion transmembrane transport	Biological process	19	821	224	17653	1.82382	0.00859813	0.274288	2.0656	0.0848214	KCNJ2//KCNJ5//PLN//MYO5A//HCN4//SLC17A4//SCN11A//JPH3//CCL21//CACNG4//KCNB1//KCNMA1//SLC9A2//ARF1//SLC26A3//CLIC1//BEST3//SLC36A1//C15ORF48
GO:0009887	animal organ morphogenesis	Biological process	22	1001	224	17653	1.73204	0.00863975	0.274322	2.0635	0.0982143	MGP//ROR2//GLI3//FGF10//HAND2//MEIS1//COL4A3BP//ZFPM2//SFRP2//NRG1//GDF7//LRRK2//CA2//MYO5A//EFEMP1//HOXD9//MYL2//FOXP2//HOXD13//RSPO3//LIMS2//ASXL3
GO:0015850	organic hydroxy compound transport	Biological process	8	228	224	17653	2.76519	0.00879935	0.278084	2.05555	0.0357143	KCNB1//PLTP//SLC51B//NPC1L1//CHGA//RAB3B//GPM6B//PLA2G10
GO:0030100	regulation of endocytosis	Biological process	8	229	224	17653	2.75312	0.00902132	0.281207	2.04473	0.0357143	ARF1//TSPAN1//CCL21//FCGR2B//SFTPA2//STAP1//LRRK2//C2
GO:0010667	negative regulation of cardiac muscle cell apoptotic process	Biological process	3	34	224	17653	6.95365	0.00902895	0.281207	2.04436	0.0133929	SFRP2//MYOCD//HAND2
GO:1904591	positive regulation of protein import	Biological process	3	34	224	17653	6.95365	0.00902895	0.281207	2.04436	0.0133929	LRRK2//GLI3//CHP2
GO:0065007	biological regulation	Biological process	173	12351	224	17653	1.10386	0.0090645	0.281207	2.04266	0.772321	CDKN2B//KLF2//ZFPM2//GLI3//HOXD9//INSM1//LMO1//MYOCD//FOXP2//LRRK2//FGF10//NRG1//SPTB//GNG3//MBNL3//KCNB1//TNFRSF13B//FCGR2B//FAS//MOB2//NEXMIF//CCL28//CCL21//CHGA//MYL2//PLN//HCN4//SOX10//TLX3//ARF1//SFTPA2//TNFRSF17//PRKAR2B//HAND2//CLIC1//TRIM36//C2//CTNND2//VPS35//TGFB1I1//RSPO3//ROR2//COL4A3BP//CHRNA3//FYB2//GCG//HPGDS//GNAL//GPR27//IGFALS//KLRC3//MDK//ASB2//PNOC//DIRAS2//ARHGAP10//SPARCL1//…
GO:0051899	membrane depolarization	Biological process	5	101	224	17653	3.90139	0.009309	0.285869	2.0311	0.0223214	HCN4//LRRK2//SCN11A//KCNJ2//CACNG4
GO:0042116	macrophage activation	Biological process	4	65	224	17653	4.84973	0.00934156	0.285869	2.02958	0.0178571	PLA2G10//FCGR2B//LRRK2//STAP1
GO:1900182	positive regulation of protein localization to nucleus	Biological process	4	65	224	17653	4.84973	0.00934156	0.285869	2.02958	0.0178571	LRRK2//GLI3//CHP2//NGFR
GO:0061138	morphogenesis of a branching epithelium	Biological process	7	185	224	17653	2.98193	0.00945857	0.288146	2.02417	0.03125	SFRP2//GLI3//GDF7//FGF10//HOXD13//RSPO3//SOX10
GO:0090100	positive regulation of transmembrane receptor protein serine/threonine kinase signaling pathway	Biological process	5	102	224	17653	3.86314	0.00969039	0.292797	2.01366	0.0223214	GDF7//BMP3//CDKN2B//TGFB1I1//MYOCD
GO:0060019	radial glial cell differentiation	Biological process	2	12	224	17653	13.1347	0.00972937	0.292797	2.01192	0.00892857	GLI3//FGF10
GO:0031641	regulation of myelination	Biological process	3	35	224	17653	6.75497	0.00978443	0.292797	2.00946	0.0133929	NRG1//SOX10//LGI4
GO:0085029	extracellular matrix assembly	Biological process	3	35	224	17653	6.75497	0.00978443	0.292797	2.00946	0.0133929	MYH11//PHLDB2//GPM6B
GO:0055123	digestive system development	Biological process	6	145	224	17653	3.26102	0.0105487	0.309711	1.9768	0.0267857	GLI3//SFRP2//SOX10//FGF10//MYOCD//HOXD13
GO:0060428	lung epithelium development	Biological process	3	36	224	17653	6.56734	0.0105756	0.309711	1.97569	0.0133929	FOXP2//KLF2//FGF10
GO:0086091	regulation of heart rate by cardiac conduction	Biological process	3	36	224	17653	6.56734	0.0105756	0.309711	1.97569	0.0133929	HCN4//KCNJ2//KCNJ5
GO:0009790	embryo development	Biological process	21	959	224	17653	1.72572	0.0106147	0.309711	1.97409	0.09375	COL4A3BP//KLF2//ZFPM2//GLI3//SOX10//HAND2//ROR2//MEOX2//TTPA//FGF10//SCEL//GREM2//PHLDB2//TGFB1I1//GDF7//HOXD9//SFRP2//HOXD13//EFEMP1//RSPO3//NRG1
GO:0086003	cardiac muscle cell contraction	Biological process	4	68	224	17653	4.63577	0.010912	0.309711	1.96209	0.0178571	KCNJ2//PLN//KCNJ5
GO:0021537	telencephalon development	Biological process	8	237	224	17653	2.66019	0.0109508	0.309711	1.96056	0.0357143	MDK//TMEM108//LRRK2//FOXP2//GLI3//POU3F3//NRG1//CNTN2
GO:0007166	cell surface receptor signaling pathway	Biological process	52	3016	224	17653	1.35876	0.0110434	0.309711	1.9569	0.232143	CTNND2//VPS35//TGFB1I1//RSPO3//ROR2//STAP1//CHRNA3//NRG1//EFEMP1//GRIA3//GRIK1//KCNB1//MDK//PLN//KAT2B//PTCHD1//EVC//GLI3//PDK4//FGF10//GDF7//BMP3//IL16//GREM2//IL1R2//FYB2//HLA-DQB1//SFRP2//CDKN2B//MYOCD//TNFRSF13B//FAS//NGFR//TNFRSF17//P2RY14//ARF1//CA1//FCGR2B//ERH//IGLL5//CD79B//TMEM108//LRRK2//CNTN2//CCL21//SOX10//SCEL//CACNG4//HAND2//LIMS2//TSPAN1//SST
GO:0001952	regulation of cell-matrix adhesion	Biological process	5	106	224	17653	3.71736	0.0113234	0.309711	1.94602	0.0223214	NEXMIF//CCL28//CCL21//GPM6B//PHLDB2
GO:0010664	negative regulation of striated muscle cell apoptotic process	Biological process	3	37	224	17653	6.38984	0.0114029	0.309711	1.94299	0.0133929	SFRP2//MYOCD//HAND2
GO:0048286	lung alveolus development	Biological process	3	37	224	17653	6.38984	0.0114029	0.309711	1.94299	0.0133929	FGF10//MYOCD//FOXP2
GO:0007171	activation of transmembrane receptor protein tyrosine kinase activity	Biological process	2	13	224	17653	12.1243	0.0114029	0.309711	1.94298	0.00892857	CHRNA3//NRG1
GO:0031274	positive regulation of pseudopodium assembly	Biological process	2	13	224	17653	12.1243	0.0114029	0.309711	1.94298	0.00892857	CDC42EP1//CCL21
GO:0031643	positive regulation of myelination	Biological process	2	13	224	17653	12.1243	0.0114029	0.309711	1.94298	0.00892857	NRG1//SOX10
GO:0032230	positive regulation of synaptic transmission, GABAergic	Biological process	2	13	224	17653	12.1243	0.0114029	0.309711	1.94298	0.00892857	CA2//CA7
GO:0042415	norepinephrine metabolic process	Biological process	2	13	224	17653	12.1243	0.0114029	0.309711	1.94298	0.00892857	INSM1//HAND2
GO:0043970	histone H3-K9 acetylation	Biological process	2	13	224	17653	12.1243	0.0114029	0.309711	1.94298	0.00892857	NAP1L2//KAT2B
GO:0048739	cardiac muscle fiber development	Biological process	2	13	224	17653	12.1243	0.0114029	0.309711	1.94298	0.00892857	MYH11//NEXN
GO:0048934	peripheral nervous system neuron differentiation	Biological process	2	13	224	17653	12.1243	0.0114029	0.309711	1.94298	0.00892857	HOXD9//HAND2
GO:0048935	peripheral nervous system neuron development	Biological process	2	13	224	17653	12.1243	0.0114029	0.309711	1.94298	0.00892857	HOXD9//HAND2
GO:0050872	white fat cell differentiation	Biological process	2	13	224	17653	12.1243	0.0114029	0.309711	1.94298	0.00892857	FABP4//FGF10
GO:0086103	G-protein coupled receptor signaling pathway involved in heart process	Biological process	2	13	224	17653	12.1243	0.0114029	0.309711	1.94298	0.00892857	PLN//CHGA
GO:1901077	regulation of relaxation of muscle	Biological process	2	13	224	17653	12.1243	0.0114029	0.309711	1.94298	0.00892857	PLN//CHGA
GO:2000095	regulation of Wnt signaling pathway, planar cell polarity pathway	Biological process	2	13	224	17653	12.1243	0.0114029	0.309711	1.94298	0.00892857	SFRP2//RSPO3
GO:0051966	regulation of synaptic transmission, glutamatergic	Biological process	4	69	224	17653	4.56858	0.011471	0.310314	1.9404	0.0178571	CACNG4//ROR2//LRRK2//GRIK1
GO:0098657	import into cell	Biological process	19	846	224	17653	1.76992	0.0115758	0.3119	1.93645	0.0848214	ARF1//LRRK2//FCGR2B//TMEM108//LOXL4//IGLL5//RAMP1//CNTN2//TSPAN1//CCL21//SFTPA2//RAB3B//GPM6B//STAP1//HCN4//SLC9A2//CACNG4//KCNJ5//C2
GO:0048584	positive regulation of response to stimulus	Biological process	42	2334	224	17653	1.41814	0.0116543	0.312496	1.93351	0.1875	LRRK2//FGF10//GNG3//NRG1//SFTPA2//FCGR2B//C2//IGLL5//GDF7//BMP3//VPS35//FYB2//HLA-DQB1//RSPO3//CFHR4//CDKN2B//TGFB1I1//MYOCD//ABRA//GCG//GPR27//DHX58//CCL21//FAS//NGFR//ROR2//ERH//KAT2B//EVC//FABP4//CD79B//STAP1//IL16//TMEM108//RAB3B//CNTN2//HAND2//CHP2//SFRP2//SCEL//CHGA//LIMS2
GO:0022008	neurogenesis	Biological process	30	1536	224	17653	1.53922	0.0117108	0.312496	1.93141	0.133929	TLX3//MATN2//GLI3//SOX10//HAND2//INSM1//GDF7//KIF5C//NGFR//SPTB//CNTN2//PLA2G10//SFRP2//MOB2//LRRK2//ROR2//LGI4//NRG1//ASPA//GPM6B//TMEM108//MEIS1//NAP1L2//CHRNA3//HOXD9//FGF10//CTNND2//ARF1//STAP1//NEXMIF
GO:0006821	chloride transport	Biological process	5	107	224	17653	3.68262	0.0117592	0.312496	1.92962	0.0223214	CLIC1//BEST3//SLC26A3//CA2//CA7
GO:0051271	negative regulation of cellular component movement	Biological process	10	340	224	17653	2.31788	0.0117827	0.312496	1.92876	0.0446429	STAP1//MMP28//SFRP2//MEOX2//CCL28//CCL21//PHLDB2//MYOCD//NRG1//NEXMIF
GO:0019933	cAMP-mediated signaling	Biological process	6	149	224	17653	3.17348	0.011951	0.315365	1.9226	0.0267857	RAMP1//GCG//GNAL//VIP//PLN//CHGA
GO:0016477	cell migration	Biological process	29	1474	224	17653	1.5505	0.0119841	0.315365	1.92139	0.129464	SOX10//TLX3//MATN2//CCL21//CHGA//HAND2//FGF10//STAP1//MMP28//POU3F3//GLI3//NRG1//CNTN2//LRRK2//TMIGD1//SST//NEXN//INSM1//ROR2//SFRP2//IL16//CCL28//GPR15//MEOX2//PHLDB2//MYOCD//NEXMIF//TSPAN1//MDK
GO:0060079	excitatory postsynaptic potential	Biological process	5	108	224	17653	3.64852	0.0122063	0.318045	1.91342	0.0223214	LRRK2//TMEM108//CHRNA3//GRIA3//GRIK1
GO:0043066	negative regulation of apoptotic process	Biological process	20	911	224	17653	1.73014	0.0122073	0.318045	1.91338	0.0892857	SFRP2//MYOCD//HAND2//NGFR//MDK//GCG//FAS//VNN1//LRRK2//CCL21//PDK4//FGF10//EVI2B//GLI3//TMIGD1//ROR2//POU3F3//LIMS2//SOX10//ARHGAP10
GO:0050767	regulation of neurogenesis	Biological process	17	732	224	17653	1.83024	0.0122489	0.318045	1.9119	0.0758929	GLI3//SOX10//SFRP2//MOB2//LRRK2//NGFR//CNTN2//TLX3//MEIS1//GDF7//NAP1L2//NRG1//ASPA//CHRNA3//ARF1//STAP1//NEXMIF
GO:0090257	regulation of muscle system process	Biological process	8	242	224	17653	2.60522	0.0123024	0.318045	1.91001	0.0357143	CHRNA3//MYL2//MYOCD//HAND2//PLN//KCNJ2//HCN4//CHGA
GO:0035051	cardiocyte differentiation	Biological process	6	150	224	17653	3.15232	0.0123211	0.318045	1.90935	0.0267857	HAND2//MYOCD//MYH11//NEXN//MYL2//NRG1
GO:0051173	positive regulation of nitrogen compound metabolic process	Biological process	51	2965	224	17653	1.35555	0.012419	0.319351	1.90591	0.227679	LRRK2//FGF10//GNG3//NRG1//FAS//MOB2//MYOCD//NGFR//CHRNA3//KAT2B//CCL21//GCG//GDF7//BMP3//SFRP2//CNTN2//KLF2//ABRA//GLI3//MDK//ROR2//POU3F3//SOX10//TGFB1I1//HAND2//RAMP1//CHGA//GUCA2B//PLA2G10//LONRF2//PRKAR2B//VIP//CDKN2B//IKZF3//ZFPM2//SSBP2//HOXD9//HOXD13//LMO1//MEIS1//MEOX2//POU2AF1//EBF4//CHP2//SPIB//ASXL3//FCGR2B//SLC51B//NAP1L2//VPS35//STAP1
GO:0010927	cellular component assembly involved in morphogenesis	Biological process	5	109	224	17653	3.61505	0.0126648	0.320953	1.8974	0.0223214	TXNDC8//LMOD1//MYH11//MYL2//PHLDB2
GO:0030111	regulation of Wnt signaling pathway	Biological process	10	344	224	17653	2.29093	0.0127041	0.320953	1.89605	0.0446429	RSPO3//SFRP2//LRRK2//CTNND2//GLI3//ROR2//SOX10//FGF10//VPS35//SCEL
GO:0010628	positive regulation of gene expression	Biological process	35	1877	224	17653	1.46952	0.0129287	0.320953	1.88844	0.15625	MYOCD//KAT2B//CNTN2//KLF2//ABRA//GDF7//FGF10//GLI3//MDK//ROR2//POU3F3//SOX10//TGFB1I1//HAND2//GCG//CDKN2B//IKZF3//ZFPM2//SSBP2//NRG1//HOXD9//HOXD13//LMO1//MEIS1//MEOX2//POU2AF1//EBF4//CHP2//SFRP2//SPIB//ASXL3//VIP//NGFR//STAP1//VPS35
GO:1905114	cell surface receptor signaling pathway involved in cell-cell signaling	Biological process	15	620	224	17653	1.90665	0.0129462	0.320953	1.88786	0.0669643	CTNND2//VPS35//TGFB1I1//RSPO3//ROR2//SFRP2//LRRK2//CHRNA3//GRIA3//GRIK1//GLI3//SOX10//FGF10//SCEL//TMEM108
GO:0007517	muscle organ development	Biological process	11	398	224	17653	2.17811	0.0130085	0.320953	1.88577	0.0491071	MYH15//ZFPM2//NRG1//HOXD9//MEOX2//FOXP2//ASB2//MYL2//MEIS1//MYOCD//EVC
GO:0048870	cell motility	Biological process	31	1615	224	17653	1.51272	0.0131404	0.320953	1.88139	0.138393	SOX10//TLX3//MATN2//CCL21//CHGA//HAND2//FGF10//STAP1//MMP28//TSPAN1//MDK//POU3F3//GLI3//NRG1//CNTN2//LRRK2//PLTP//TMIGD1//SST//NEXN//INSM1//ROR2//SFRP2//IL16//CFAP54//CCL28//GPR15//MEOX2//PHLDB2//MYOCD//NEXMIF
GO:0051674	localization of cell	Biological process	31	1615	224	17653	1.51272	0.0131404	0.320953	1.88139	0.138393	SOX10//TLX3//MATN2//CCL21//CHGA//HAND2//FGF10//STAP1//MMP28//TSPAN1//MDK//POU3F3//GLI3//NRG1//CNTN2//LRRK2//PLTP//TMIGD1//SST//NEXN//INSM1//ROR2//SFRP2//IL16//CFAP54//CCL28//GPR15//MEOX2//PHLDB2//MYOCD//NEXMIF
GO:0014003	oligodendrocyte development	Biological process	3	39	224	17653	6.06216	0.0131665	0.320953	1.88053	0.0133929	ASPA//SOX10//CNTN2
GO:0043954	cellular component maintenance	Biological process	3	39	224	17653	6.06216	0.0131665	0.320953	1.88053	0.0133929	FCGR2B//VPS35//MYOCD
GO:0055085	transmembrane transport	Biological process	30	1550	224	17653	1.52532	0.0131714	0.320953	1.88037	0.133929	SLC36A1//KCNJ2//KCNJ5//PLN//SLC28A2//MYO5A//CHRNA3//GRIA3//GRIK1//AQP8//HCN4//SCN11A//CLIC1//KCNB1//KCNMA1//SLC17A4//TRARG1//JPH3//CCL21//CACNG4//SLC9A2//ARF1//SLC26A3//BEST3//C15ORF48//MFSD4A//CA2//PIRT//NGFR//SLC51B
GO:0030007	cellular potassium ion homeostasis	Biological process	2	14	224	17653	11.2583	0.0131931	0.320953	1.87965	0.00892857	KCNJ2//KCNMA1
GO:0031272	regulation of pseudopodium assembly	Biological process	2	14	224	17653	11.2583	0.0131931	0.320953	1.87965	0.00892857	CDC42EP1//CCL21
GO:0035112	genitalia morphogenesis	Biological process	2	14	224	17653	11.2583	0.0131931	0.320953	1.87965	0.00892857	FGF10//ROR2
GO:0050930	induction of positive chemotaxis	Biological process	2	14	224	17653	11.2583	0.0131931	0.320953	1.87965	0.00892857	FGF10//IL16
GO:0060049	regulation of protein glycosylation	Biological process	2	14	224	17653	11.2583	0.0131931	0.320953	1.87965	0.00892857	RAMP1//SLC51B
GO:0043069	negative regulation of programmed cell death	Biological process	20	924	224	17653	1.7058	0.0140596	0.33467	1.85203	0.0892857	EVI2B//GCG//GLI3//FAS//TMIGD1//NGFR//ROR2//POU3F3//LIMS2//SOX10//ARHGAP10//SFRP2//MYOCD//HAND2//MDK//VNN1//LRRK2//CCL21//PDK4//FGF10
GO:0007411	axon guidance	Biological process	8	248	224	17653	2.54219	0.0140818	0.33467	1.85134	0.0357143	KIF5C//GDF7//GLI3//MATN2//NGFR//SPTB//CNTN2//PLA2G10
GO:0017145	stem cell division	Biological process	3	40	224	17653	5.9106	0.0141033	0.33467	1.85068	0.0133929	EVI2B//NAP1L2//SFRP2
GO:0033628	regulation of cell adhesion mediated by integrin	Biological process	3	40	224	17653	5.9106	0.0141033	0.33467	1.85068	0.0133929	NEXMIF//CCL21//SFRP2
GO:0042551	neuron maturation	Biological process	3	40	224	17653	5.9106	0.0141033	0.33467	1.85068	0.0133929	LRRK2//CNTN2//LGI4
GO:0086004	regulation of cardiac muscle cell contraction	Biological process	3	40	224	17653	5.9106	0.0141033	0.33467	1.85068	0.0133929	HCN4//KCNJ2//PLN
GO:1905517	macrophage migration	Biological process	3	40	224	17653	5.9106	0.0141033	0.33467	1.85068	0.0133929	STAP1//MMP28//ROR2
GO:1901701	cellular response to oxygen-containing compound	Biological process	22	1048	224	17653	1.65437	0.01416	0.334841	1.84894	0.0982143	PDK4//CPEB1//MYO5A//KAT2B//GCG//GPR27//CA2//TRARG1//KLF2//STAP1//HCN4//SLC26A3//AQP8//KCNB1//GNG3//GNG7//PRKAR2B//SOX10//CHRNA3//LRRK2//FCGR2B//NGFR
GO:0007399	nervous system development	Biological process	41	2296	224	17653	1.40729	0.0143339	0.337771	1.84363	0.183036	TLX3//MATN2//GLI3//SOX10//HAND2//INSM1//GDF7//KIF5C//NGFR//SPTB//CNTN2//PLA2G10//NRG1//GRIK1//POU3F3//GSTM3//SFRP2//MOB2//LRRK2//ROR2//LGI4//MDK//TMEM108//FCGR2B//FOXP2//PTCHD1//FGF10//ASPA//GPM6B//MYO5A//MEIS1//NAP1L2//CHRNA3//HOXD9//CTNND2//ARF1//STAP1//VPS35//NEXMIF//BPNT1//ITM2A
GO:2000027	regulation of organ morphogenesis	Biological process	8	249	224	17653	2.53199	0.0143957	0.338049	1.84177	0.0357143	FGF10//HAND2//SFRP2//ROR2//FOXP2//HOXD13//RSPO3//LIMS2
GO:0050764	regulation of phagocytosis	Biological process	4	74	224	17653	4.25989	0.0145413	0.340287	1.8374	0.0178571	FCGR2B//SFTPA2//STAP1//C2
GO:0097485	neuron projection guidance	Biological process	8	250	224	17653	2.52186	0.0147147	0.341784	1.83225	0.0357143	GDF7//GLI3//KIF5C//MATN2//NGFR//SPTB//CNTN2//PLA2G10
GO:0010941	regulation of cell death	Biological process	32	1696	224	17653	1.48694	0.0148394	0.341784	1.82858	0.142857	FAS//NGFR//EVI2B//GCG//GLI3//TMIGD1//ROR2//POU3F3//LIMS2//SOX10//ARHGAP10//SFRP2//MYOCD//HAND2//GDF7//IKZF3//CIDEC//BMP3//KCNMA1//ARHGEF4//LRRK2//MDK//ZFPM2//VPS35//TTPA//CHGA//FCGR2B//VNN1//CCL21//KCNB1//PDK4//FGF10
GO:1901700	response to oxygen-containing compound	Biological process	30	1565	224	17653	1.5107	0.0148975	0.341784	1.82689	0.133929	PDK4//CPEB1//FGF10//FAS//NGFR//PLN//MYO5A//KAT2B//HOXD13//FOXP2//KCNMA1//CCL21//GCG//GPR27//CA2//SST//TRARG1//KLF2//STAP1//HCN4//SLC26A3//AQP8//KCNB1//GNG3//GNG7//PRKAR2B//SOX10//CHRNA3//LRRK2//FCGR2B
GO:0040013	negative regulation of locomotion	Biological process	10	353	224	17653	2.23252	0.0149752	0.341784	1.82463	0.0446429	STAP1//MMP28//SFRP2//MEOX2//CCL28//CCL21//PHLDB2//MYOCD//NRG1//NEXMIF
GO:0009268	response to pH	Biological process	3	41	224	17653	5.76644	0.0150771	0.341784	1.82168	0.0133929	SST//TTPA//CA2
GO:0021542	dentate gyrus development	Biological process	2	15	224	17653	10.5077	0.0150968	0.341784	1.82112	0.00892857	MDK//TMEM108
GO:0031657	regulation of cyclin-dependent protein serine/threonine kinase activity involved in G1/S transition of mitotic cell cycle	Biological process	2	15	224	17653	10.5077	0.0150968	0.341784	1.82112	0.00892857	CDKN2B//FGF10
GO:0098719	sodium ion import across plasma membrane	Biological process	2	15	224	17653	10.5077	0.0150968	0.341784	1.82112	0.00892857	HCN4//SLC9A2
GO:0098856	intestinal lipid absorption	Biological process	2	15	224	17653	10.5077	0.0150968	0.341784	1.82112	0.00892857	NPC1L1//FABP2
GO:0048762	mesenchymal cell differentiation	Biological process	7	203	224	17653	2.71752	0.0151547	0.341784	1.81945	0.03125	SOX10//HAND2//PHLDB2//TGFB1I1//SFRP2//NRG1//FGF10
GO:0048699	generation of neurons	Biological process	28	1437	224	17653	1.53558	0.01518	0.341784	1.81873	0.125	TLX3//MATN2//GLI3//SOX10//HAND2//INSM1//GDF7//KIF5C//NGFR//SPTB//CNTN2//PLA2G10//SFRP2//MOB2//LRRK2//GPM6B//TMEM108//LGI4//MEIS1//NAP1L2//NRG1//ASPA//CHRNA3//HOXD9//CTNND2//ARF1//STAP1//NEXMIF
GO:0015844	monoamine transport	Biological process	4	75	224	17653	4.2031	0.0152117	0.341784	1.81782	0.0178571	KCNB1//CHGA//RAB3B//GPM6B
GO:0009605	response to external stimulus	Biological process	41	2306	224	17653	1.40118	0.0153346	0.343404	1.81433	0.183036	MYOCD//FCGR2B//NRG1//CCL21//CHGA//IGLL5//DHX58//CCL28//SCEL//GDF7//GLI3//KIF5C//MATN2//NGFR//SPTB//CNTN2//PLA2G10//SFRP2//SST//C2//TTPA//LYPD8//LRRK2//PDK4//STAP1//MMP28//FAS//KCNJ2//CFHR4//IL16//CDKN2B//KCNB1//FGF10//FOXP2//GCG//VPS35//FABP4//LXN//ARF1//IL1R2//PHLDB2
GO:0003205	cardiac chamber development	Biological process	6	158	224	17653	2.99271	0.0155771	0.347682	1.80751	0.0267857	ZFPM2//SFRP2//HAND2//NRG1//MYOCD//MYL2
GO:0070252	actin-mediated cell contraction	Biological process	5	115	224	17653	3.42644	0.0156618	0.348423	1.80516	0.0223214	MYL2//KCNJ2//PLN//KCNJ5
GO:0009653	anatomical structure morphogenesis	Biological process	46	2656	224	17653	1.3649	0.0158732	0.350819	1.79933	0.205357	COL4A3BP//KLF2//CDH19//NRG1//MGP//ROR2//RAMP1//FGF10//MEIS1//MEOX2//HAND2//SFRP2//ZFPM2//MYOCD//GLI3//TXNDC8//CA2//LOXL4//RSPO3//ASXL3//GDF7//KIF5C//MATN2//NGFR//SPTB//CNTN2//PLA2G10//CDC42EP1//GREM2//PHLDB2//TGFB1I1//LMOD1//MYH11//HOXD9//LRRK2//MYO5A//HOXD13//EFEMP1//SOX10//CHRNA3//MYL2//FOXP2//CTNND2//VPS35//TMEM108//LIMS2
GO:0071310	cellular response to organic substance	Biological process	46	2656	224	17653	1.3649	0.0158732	0.350819	1.79933	0.205357	PDK4//FGF10//SST//IL16//GREM2//IL1R2//CPEB1//GDF7//ROR2//BMP3//CDKN2B//TGFB1I1//MYOCD//SFRP2//MYO5A//KAT2B//RAMP1//TNFRSF13B//FAS//NGFR//TNFRSF17//ARF1//CA1//GCG//GPR27//CA2//TRARG1//TMEM108//HLA-DQB1//CCL21//STAP1//HCN4//SLC26A3//AQP8//KCNB1//KLF2//FABP4//GNG3//GNG7//PRKAR2B//SOX10//CHRNA3//LRRK2//FCGR2B//PLA2G10//SYNGR1
GO:0009792	embryo development ending in birth or egg hatching	Biological process	14	578	224	17653	1.90885	0.0159368	0.351077	1.7976	0.0625	COL4A3BP//KLF2//ZFPM2//GLI3//SOX10//HAND2//ROR2//MEOX2//TTPA//GDF7//HOXD9//RSPO3//SFRP2//SCEL
GO:0010107	potassium ion import	Biological process	3	42	224	17653	5.62915	0.016088	0.352113	1.7935	0.0133929	HCN4//KCNJ5//KCNJ2
GO:0033574	response to testosterone	Biological process	3	42	224	17653	5.62915	0.016088	0.352113	1.7935	0.0133929	HOXD13//PLN//FOXP2
GO:0019935	cyclic-nucleotide-mediated signaling	Biological process	6	160	224	17653	2.9553	0.0164759	0.359344	1.78315	0.0267857	RAMP1//GCG//GNAL//VIP//PLN//CHGA
GO:0048729	tissue morphogenesis	Biological process	15	639	224	17653	1.84995	0.0165908	0.359344	1.78013	0.0669643	SFRP2//GLI3//HAND2//CA2//ZFPM2//NRG1//TGFB1I1//GDF7//FGF10//MYL2//ROR2//HOXD13//RSPO3//SOX10//PHLDB2
GO:0051952	regulation of amine transport	Biological process	4	77	224	17653	4.09392	0.0166103	0.359344	1.77962	0.0178571	KCNB1//CHRNA3//CHGA//RAB3B
GO:0032870	cellular response to hormone stimulus	Biological process	16	698	224	17653	1.80649	0.0166309	0.359344	1.77908	0.0714286	PDK4//SST//TGFB1I1//MYO5A//CPEB1//KAT2B//CA2//TRARG1//GCG//GNG3//GNG7//PRKAR2B//SOX10//CHRNA3//NGFR//RAMP1
GO:0021700	developmental maturation	Biological process	8	256	224	17653	2.46275	0.0167375	0.360495	1.77631	0.0357143	LRRK2//LGI4//KLF2//CNTN2//SLC26A3//CCL21//SOX10//MYO5A
GO:0002694	regulation of leukocyte activation	Biological process	13	525	224	17653	1.95144	0.0168589	0.361958	1.77317	0.0580357	IKZF3//FCGR2B//TNFRSF13B//HLA-DQB1//CCL21//VNN1//PLA2G10//LMO1//GLI3//FGF10//IGLL5//LRRK2//STAP1
GO:0002689	negative regulation of leukocyte chemotaxis	Biological process	2	16	224	17653	9.851	0.0171107	0.363295	1.76673	0.00892857	STAP1//MMP28
GO:0030889	negative regulation of B cell proliferation	Biological process	2	16	224	17653	9.851	0.0171107	0.363295	1.76673	0.00892857	FCGR2B//TNFRSF13B
GO:0031269	pseudopodium assembly	Biological process	2	16	224	17653	9.851	0.0171107	0.363295	1.76673	0.00892857	CDC42EP1//CCL21
GO:0048483	autonomic nervous system development	Biological process	3	43	224	17653	5.49824	0.017136	0.363295	1.76609	0.0133929	SOX10//HAND2//INSM1
GO:0048534	hematopoietic or lymphoid organ development	Biological process	19	882	224	17653	1.69768	0.0172524	0.36462	1.76315	0.0848214	TNFRSF13B//FCGR2B//ITM2A//CD79B//CDKN2B//EVI2B//GLI3//VNN1//MEIS1//KLF2//IKZF3//ROR2//KAT2B//CA2//FGF10//HAND2//MFAP5//SFRP2//LMO1
GO:0055117	regulation of cardiac muscle contraction	Biological process	4	78	224	17653	4.04144	0.0173388	0.365303	1.76098	0.0178571	PLN//CHGA//KCNJ2//HCN4
GO:0060485	mesenchyme development	Biological process	8	258	224	17653	2.44366	0.0174543	0.366594	1.7581	0.0357143	SOX10//HAND2//ZFPM2//PHLDB2//TGFB1I1//SFRP2//NRG1//FGF10
GO:0022612	gland morphogenesis	Biological process	5	119	224	17653	3.31126	0.0179028	0.37485	1.74708	0.0223214	FGF10//HOXD13//GLI3//LIMS2//GDF7
GO:0051094	positive regulation of developmental process	Biological process	26	1329	224	17653	1.54177	0.0182083	0.379174	1.73973	0.116071	FGF10//GLI3//SOX10//TGFB1I1//PLA2G10//MOB2//GPM6B//EVI2B//NRG1//VNN1//INSM1//SFRP2//ROR2//GDF7//NAP1L2//CLIC1//CA2//ASPA//NGFR//MYOCD//ZFPM2//FOXP2//ARF1//VPS35//PHLDB2//HAND2
GO:0006775	fat-soluble vitamin metabolic process	Biological process	3	44	224	17653	5.37328	0.0182214	0.379174	1.73942	0.0133929	RLBP1//PLTP//TTPA
GO:0007519	skeletal muscle tissue development	Biological process	6	165	224	17653	2.86575	0.0188783	0.388206	1.72404	0.0267857	MYH15//ASB2//MYOCD//HOXD9//MEOX2//FOXP2
GO:0055007	cardiac muscle cell differentiation	Biological process	5	121	224	17653	3.25653	0.0190988	0.388206	1.71899	0.0223214	MYH11//NEXN//MYL2//MYOCD//NRG1
GO:0002577	regulation of antigen processing and presentation	Biological process	2	17	224	17653	9.27153	0.0192319	0.388206	1.71598	0.00892857	FCGR2B//CCL21
GO:0021756	striatum development	Biological process	2	17	224	17653	9.27153	0.0192319	0.388206	1.71598	0.00892857	FOXP2//LRRK2
GO:0031268	pseudopodium organization	Biological process	2	17	224	17653	9.27153	0.0192319	0.388206	1.71598	0.00892857	CDC42EP1//CCL21
GO:0033630	positive regulation of cell adhesion mediated by integrin	Biological process	2	17	224	17653	9.27153	0.0192319	0.388206	1.71598	0.00892857	CCL21//SFRP2
GO:0051580	regulation of neurotransmitter uptake	Biological process	2	17	224	17653	9.27153	0.0192319	0.388206	1.71598	0.00892857	RAB3B//GPM6B
GO:0070884	regulation of calcineurin-NFAT signaling cascade	Biological process	2	17	224	17653	9.27153	0.0192319	0.388206	1.71598	0.00892857	NRG1//CHP2
GO:0106056	regulation of calcineurin-mediated signaling	Biological process	2	17	224	17653	9.27153	0.0192319	0.388206	1.71598	0.00892857	NRG1//CHP2
GO:0008347	glial cell migration	Biological process	3	45	224	17653	5.25387	0.0193443	0.388206	1.71345	0.0133929	GLI3//STAP1//MATN2
GO:0048066	developmental pigmentation	Biological process	3	45	224	17653	5.25387	0.0193443	0.388206	1.71345	0.0133929	GLI3//MYO5A//SOX10
GO:1903115	regulation of actin filament-based movement	Biological process	3	45	224	17653	5.25387	0.0193443	0.388206	1.71345	0.0133929	KCNJ2//PLN//HCN4
GO:0098655	cation transmembrane transport	Biological process	18	832	224	17653	1.70498	0.0194377	0.388926	1.71136	0.0803571	KCNJ2//KCNJ5//PLN//MYO5A//SLC36A1//HCN4//SLC17A4//SCN11A//JPH3//CCL21//CACNG4//KCNB1//KCNMA1//SLC9A2//ARF1//C15ORF48//PIRT//CHRNA3
GO:0042127	regulation of cell proliferation	Biological process	31	1668	224	17653	1.46466	0.019894	0.395894	1.70128	0.138393	GLI3//SOX10//FOXP2//HAND2//NRG1//POU3F3//CHP2//SFRP2//VIP//MYOCD//CDKN2B//DPT//FGF10//INSM1//ROR2//SST//TGFB1I1//KAT2B//IKZF3//FCGR2B//TNFRSF13B//LMO1//MEIS1//ZFPM2//LRRK2//NGFR//LIMS2//HPGDS//HOXD13//FAS//TMIGD1
GO:0030324	lung development	Biological process	6	167	224	17653	2.83143	0.019903	0.395894	1.70108	0.0267857	MYOCD//FOXP2//FGF10//KLF2//ZFPM2//GLI3
GO:0042476	odontogenesis	Biological process	5	123	224	17653	3.20358	0.0203463	0.401949	1.69152	0.0223214	FGF10//GLI3//CA2//HAND2//MYO5A
GO:0045445	myoblast differentiation	Biological process	4	82	224	17653	3.84429	0.0204507	0.401949	1.68929	0.0178571	MYOCD//MBNL3//NRG1//ASB2
GO:0007212	dopamine receptor signaling pathway	Biological process	3	46	224	17653	5.13965	0.0205046	0.401949	1.68815	0.0133929	GNAL//LRRK2//VPS35
GO:0048806	genitalia development	Biological process	3	46	224	17653	5.13965	0.0205046	0.401949	1.68815	0.0133929	FGF10//ROR2//HOXD13
GO:2000179	positive regulation of neural precursor cell proliferation	Biological process	3	46	224	17653	5.13965	0.0205046	0.401949	1.68815	0.0133929	GLI3//SOX10//INSM1
GO:0008283	cell proliferation	Biological process	37	2078	224	17653	1.40322	0.0207477	0.405539	1.68303	0.165179	GLI3//SOX10//FOXP2//HAND2//NRG1//POU3F3//CHP2//SFRP2//VIP//MYOCD//CDKN2B//DPT//FGF10//INSM1//ROR2//SST//TGFB1I1//KAT2B//LGI4//IKZF3//FCGR2B//TNFRSF13B//HOXD13//FAS//TMIGD1//NGFR//LMO1//C3ORF58//MEIS1//ZFPM2//LRRK2//LIMS2//HPGDS//COL4A3BP//TSPAN1//GCG//TNFRSF17
GO:0003206	cardiac chamber morphogenesis	Biological process	5	124	224	17653	3.17774	0.0209895	0.407908	1.678	0.0223214	ZFPM2//SFRP2//HAND2//NRG1//MYL2
GO:0099565	chemical synaptic transmission, postsynaptic	Biological process	5	124	224	17653	3.17774	0.0209895	0.407908	1.678	0.0223214	CHRNA3//LRRK2//GRIA3//GRIK1//TMEM108
GO:0002313	mature B cell differentiation involved in immune response	Biological process	2	18	224	17653	8.75645	0.0214572	0.412259	1.66843	0.00892857	FCGR2B//ITM2A
GO:0010002	cardioblast differentiation	Biological process	2	18	224	17653	8.75645	0.0214572	0.412259	1.66843	0.00892857	MYOCD//NRG1
GO:0097062	dendritic spine maintenance	Biological process	2	18	224	17653	8.75645	0.0214572	0.412259	1.66843	0.00892857	FCGR2B//VPS35
GO:0098810	neurotransmitter reuptake	Biological process	2	18	224	17653	8.75645	0.0214572	0.412259	1.66843	0.00892857	RAB3B//GPM6B
GO:0030199	collagen fibril organization	Biological process	3	47	224	17653	5.0303	0.0217024	0.414275	1.66349	0.0133929	DPT//SFRP2//LOXL4
GO:0048608	reproductive structure development	Biological process	11	430	224	17653	2.01602	0.0217459	0.414275	1.66262	0.0491071	DMRTA1//TTPA//ZFPM2//SFRP2//FGF10//ROR2//HOXD13//GLI3//MYOCD//RSPO3//GDF7
GO:0048732	gland development	Biological process	11	430	224	17653	2.01602	0.0217459	0.414275	1.66262	0.0491071	FGF10//GDF7//MDK//GLI3//NRG1//HOXD9//SOX10//HAND2//HOXD13//INSM1//LIMS2
GO:0019722	calcium-mediated signaling	Biological process	6	171	224	17653	2.76519	0.0220646	0.417991	1.6563	0.0267857	PLN//MYO5A//JPH3//NRG1//CHP2//LRRK2
GO:0030323	respiratory tube development	Biological process	6	171	224	17653	2.76519	0.0220646	0.417991	1.6563	0.0267857	ZFPM2//GLI3//MYOCD//FOXP2//FGF10//KLF2
GO:0015837	amine transport	Biological process	4	84	224	17653	3.75276	0.0221272	0.418006	1.65507	0.0178571	KCNB1//CHRNA3//CHGA//RAB3B
GO:0061458	reproductive system development	Biological process	11	433	224	17653	2.00205	0.0227442	0.423766	1.64313	0.0491071	DMRTA1//TTPA//ZFPM2//SFRP2//FGF10//ROR2//HOXD13//GLI3//GDF7//MYOCD//RSPO3
GO:0051241	negative regulation of multicellular organismal process	Biological process	23	1162	224	17653	1.55988	0.0228258	0.423766	1.64157	0.102679	PLN//SOX10//SFRP2//LRRK2//NGFR//EFEMP1//DHX58//FCGR2B//KLF2//MEIS1//GLI3//TLX3//CNTN2//HAND2//IL1R2//MEOX2//MYOCD//STAP1//ZFPM2//HPGDS//LIMS2//NRG1//NEXMIF
GO:0045747	positive regulation of Notch signaling pathway	Biological process	3	48	224	17653	4.9255	0.0229377	0.423766	1.63945	0.0133929	ERH//FGF10//KAT2B
GO:0051452	intracellular pH reduction	Biological process	3	48	224	17653	4.9255	0.0229377	0.423766	1.63945	0.0133929	CA2//CA7//TTPA
GO:0055010	ventricular cardiac muscle tissue morphogenesis	Biological process	3	48	224	17653	4.9255	0.0229377	0.423766	1.63945	0.0133929	ZFPM2//NRG1//MYL2
GO:0001708	cell fate specification	Biological process	4	85	224	17653	3.70861	0.022996	0.423766	1.63835	0.0178571	GLI3//SFRP2//MYL2//TLX3
GO:0007215	glutamate receptor signaling pathway	Biological process	4	85	224	17653	3.70861	0.022996	0.423766	1.63835	0.0178571	GRIA3//GRIK1//CACNG4//KCNB1
GO:0042475	odontogenesis of dentin-containing tooth	Biological process	4	85	224	17653	3.70861	0.022996	0.423766	1.63835	0.0178571	FGF10//GLI3//CA2//HAND2
GO:0045778	positive regulation of ossification	Biological process	4	85	224	17653	3.70861	0.022996	0.423766	1.63835	0.0178571	GPM6B//CLIC1//GLI3//SFRP2
GO:0060538	skeletal muscle organ development	Biological process	6	173	224	17653	2.73323	0.0232026	0.42641	1.63446	0.0267857	MYH15//HOXD9//MEOX2//FOXP2//ASB2//MYOCD
GO:0032989	cellular component morphogenesis	Biological process	22	1101	224	17653	1.57473	0.0234317	0.428934	1.6302	0.0982143	COL4A3BP//KLF2//CDH19//NRG1//TXNDC8//GDF7//GLI3//KIF5C//MATN2//NGFR//SPTB//CNTN2//PLA2G10//CDC42EP1//LMOD1//MYH11//LRRK2//CHRNA3//MYL2//CTNND2//TMEM108//PHLDB2
GO:0006875	cellular metal ion homeostasis	Biological process	13	550	224	17653	1.86274	0.0236361	0.428934	1.62642	0.0580357	ARF1//CYBRD1//MT1A//GNG3//CCL28//PLN//KCNJ2//KCNMA1//MYO5A//JPH3//CCL21//SCGN//CALB2
GO:0007224	smoothened signaling pathway	Biological process	5	128	224	17653	3.07844	0.0236947	0.428934	1.62535	0.0223214	FGF10//GLI3//EVC//PTCHD1//ROR2
GO:0042693	muscle cell fate commitment	Biological process	2	19	224	17653	8.29558	0.0237839	0.428934	1.62372	0.00892857	MYL2//FGF10
GO:0048557	embryonic digestive tract morphogenesis	Biological process	2	19	224	17653	8.29558	0.0237839	0.428934	1.62372	0.00892857	FGF10//GLI3
GO:0099632	protein transport within plasma membrane	Biological process	2	19	224	17653	8.29558	0.0237839	0.428934	1.62372	0.00892857	CACNG4//VPS35
GO:0099637	neurotransmitter receptor transport	Biological process	2	19	224	17653	8.29558	0.0237839	0.428934	1.62372	0.00892857	CACNG4//VPS35
GO:0030850	prostate gland development	Biological process	3	49	224	17653	4.82498	0.0242106	0.432022	1.61599	0.0133929	FGF10//HOXD13//GLI3
GO:0045851	pH reduction	Biological process	3	49	224	17653	4.82498	0.0242106	0.432022	1.61599	0.0133929	CA2//CA7//TTPA
GO:0046579	positive regulation of Ras protein signal transduction	Biological process	3	49	224	17653	4.82498	0.0242106	0.432022	1.61599	0.0133929	ABRA//FGF10//NRG1
GO:0086010	membrane depolarization during action potential	Biological process	3	49	224	17653	4.82498	0.0242106	0.432022	1.61599	0.0133929	HCN4//KCNJ2//SCN11A
GO:0072359	circulatory system development	Biological process	22	1105	224	17653	1.56903	0.0242874	0.432251	1.61462	0.0982143	RAMP1//FGF10//MEIS1//MEOX2//HAND2//SFRP2//ZFPM2//MYOCD//LOXL4//RSPO3//COL4A3BP//NRG1//GLI3//GYS1//MYL2//KAT2B//PLN//MYH11//NEXN//C3ORF58//NGFR//KLF2
GO:0060078	regulation of postsynaptic membrane potential	Biological process	5	129	224	17653	3.05458	0.0244045	0.433196	1.61253	0.0223214	CHRNA3//LRRK2//GRIA3//GRIK1//TMEM108
GO:0009991	response to extracellular stimulus	Biological process	12	495	224	17653	1.9105	0.0245303	0.434288	1.6103	0.0535714	MYOCD//CCL28//SFRP2//SST//C2//TTPA//LRRK2//PDK4//CDKN2B//KCNB1//FAS//GCG
GO:0060284	regulation of cell development	Biological process	18	858	224	17653	1.65332	0.0254838	0.443698	1.59374	0.0803571	GLI3//SOX10//SFRP2//MOB2//LRRK2//NGFR//CNTN2//TLX3//MEIS1//GDF7//NAP1L2//NRG1//ASPA//CHRNA3//ARF1//TTPA//STAP1//NEXMIF
GO:0010665	regulation of cardiac muscle cell apoptotic process	Biological process	3	50	224	17653	4.72848	0.025521	0.443698	1.5931	0.0133929	SFRP2//MYOCD//HAND2
GO:0042306	regulation of protein import into nucleus	Biological process	3	50	224	17653	4.72848	0.025521	0.443698	1.5931	0.0133929	LRRK2//GLI3//CHP2
GO:0050879	multicellular organismal movement	Biological process	3	50	224	17653	4.72848	0.025521	0.443698	1.5931	0.0133929	KCNJ2//SYNM//VPS35
GO:0050881	musculoskeletal movement	Biological process	3	50	224	17653	4.72848	0.025521	0.443698	1.5931	0.0133929	KCNJ2//SYNM//VPS35
GO:0098659	inorganic cation import across plasma membrane	Biological process	3	50	224	17653	4.72848	0.025521	0.443698	1.5931	0.0133929	HCN4//SLC9A2//KCNJ5
GO:0099587	inorganic ion import across plasma membrane	Biological process	3	50	224	17653	4.72848	0.025521	0.443698	1.5931	0.0133929	HCN4//SLC9A2//KCNJ5
GO:0000079	regulation of cyclin-dependent protein serine/threonine kinase activity	Biological process	4	88	224	17653	3.58218	0.0257258	0.445352	1.58963	0.0178571	CDKN2B//FGF10//KAT2B//MYOCD
GO:0032956	regulation of actin cytoskeleton organization	Biological process	9	331	224	17653	2.14282	0.0258061	0.445352	1.58828	0.0401786	CDC42EP1//LMOD1//CCL21//SYNPO2//ARF1//PHLDB2//SPTB//STAP1//GPM6B
GO:0071702	organic substance transport	Biological process	45	2667	224	17653	1.32972	0.0258138	0.445352	1.58815	0.200893	ABRA//SLC36A1//SYNGR1//CFHR4//PLTP//RAMP1//RAB39B//RAB44//NGFR//VPS35//RAB3B//MLPH//GCG//KCNB1//CHRNA3//NACAD//GPM6B//ARF1//CHP2//CA2//SLC26A3//CA1//CA4//CA7//SLC51B//SLC28A2//TCN2//MYO5A//NPC1L1//PLA2G10//LRRK2//CHGA//COL4A3BP//GPR27//GLI3//TRARG1//TTPA//FCGR2B//IL1R2//KIF5C//VIP//FABP2//CACNG4//NRG1//MFSD4A
GO:0001502	cartilage condensation	Biological process	2	20	224	17653	7.8808	0.0262088	0.445352	1.58155	0.00892857	MGP//ROR2
GO:0002052	positive regulation of neuroblast proliferation	Biological process	2	20	224	17653	7.8808	0.0262088	0.445352	1.58155	0.00892857	GLI3//SOX10
GO:0003215	cardiac right ventricle morphogenesis	Biological process	2	20	224	17653	7.8808	0.0262088	0.445352	1.58155	0.00892857	HAND2//ZFPM2
GO:0030325	adrenal gland development	Biological process	2	20	224	17653	7.8808	0.0262088	0.445352	1.58155	0.00892857	INSM1//MDK
GO:0060602	branch elongation of an epithelium	Biological process	2	20	224	17653	7.8808	0.0262088	0.445352	1.58155	0.00892857	FGF10//HOXD13
GO:1990126	retrograde transport, endosome to plasma membrane	Biological process	2	20	224	17653	7.8808	0.0262088	0.445352	1.58155	0.00892857	TRARG1//VPS35
GO:0098662	inorganic cation transmembrane transport	Biological process	16	738	224	17653	1.70858	0.0263134	0.446009	1.57982	0.0714286	KCNJ2//KCNJ5//PLN//MYO5A//HCN4//SLC17A4//SCN11A//JPH3//CCL21//CACNG4//KCNB1//KCNMA1//SLC9A2//ARF1//SLC36A1//C15ORF48
GO:0043009	chordate embryonic development	Biological process	13	560	224	17653	1.82947	0.02685	0.451497	1.57106	0.0580357	COL4A3BP//KLF2//ZFPM2//GLI3//SOX10//HAND2//ROR2//MEOX2//TTPA//GDF7//HOXD9//RSPO3//SFRP2
GO:0002763	positive regulation of myeloid leukocyte differentiation	Biological process	3	51	224	17653	4.63577	0.0268688	0.451497	1.57075	0.0133929	EVI2B//ROR2//CA2
GO:0071320	cellular response to cAMP	Biological process	3	51	224	17653	4.63577	0.0268688	0.451497	1.57075	0.0133929	HCN4//SLC26A3//AQP8
GO:0045597	positive regulation of cell differentiation	Biological process	19	926	224	17653	1.61701	0.0269154	0.451497	1.57	0.0848214	GLI3//SOX10//TGFB1I1//PLA2G10//MOB2//EVI2B//VNN1//SFRP2//ROR2//GDF7//NAP1L2//CLIC1//CA2//NRG1//ASPA//NGFR//MYOCD//ARF1//INSM1
GO:0007186	G-protein coupled receptor signaling pathway	Biological process	26	1377	224	17653	1.48802	0.026971	0.451497	1.5691	0.116071	GCG//GNAL//RAMP1//VIP//PNOC//GNG7//RGS13//LRRK2//VPS35//P2RY14//CA2//CNTN2//PLN//CHGA//GPR27//INSL5//RGS19//GNG3//GPR15//OR11G2//ARHGEF4//CCL28//CCL21//SFRP2//SST//TAAR5
GO:1902107	positive regulation of leukocyte differentiation	Biological process	5	133	224	17653	2.96271	0.0273801	0.457022	1.56257	0.0223214	EVI2B//VNN1//ROR2//CA2//GLI3
GO:0002520	immune system development	Biological process	19	928	224	17653	1.61353	0.0274362	0.457022	1.56168	0.0848214	TNFRSF13B//FCGR2B//ITM2A//CD79B//CDKN2B//EVI2B//GLI3//VNN1//MEIS1//KLF2//IKZF3//ROR2//KAT2B//CA2//FGF10//HAND2//MFAP5//SFRP2//LMO1
GO:0002682	regulation of immune system process	Biological process	29	1579	224	17653	1.44739	0.0276168	0.457197	1.55883	0.129464	FCGR2B//SFTPA2//CCL21//C2//IGLL5//STAP1//MMP28//FYB2//HLA-DQB1//CFHR4//EVI2B//IKZF3//TNFRSF13B//VNN1//DHX58//PLA2G10//MEIS1//ROR2//KAT2B//CA2//LMO1//GLI3//FGF10//SLAMF7//CD1B//CLEC2B//CD79B//CCL28//LRRK2
GO:0051588	regulation of neurotransmitter transport	Biological process	4	90	224	17653	3.50258	0.0276495	0.457197	1.55831	0.0178571	CHRNA3//RAB3B//GPM6B//LRRK2
GO:0060996	dendritic spine development	Biological process	4	90	224	17653	3.50258	0.0276495	0.457197	1.55831	0.0178571	CTNND2//NRG1//ARF1//LRRK2
GO:0050865	regulation of cell activation	Biological process	13	563	224	17653	1.81972	0.0278741	0.457414	1.5548	0.0580357	IKZF3//FCGR2B//TNFRSF13B//HLA-DQB1//CCL21//VNN1//PLA2G10//LMO1//GLI3//FGF10//IGLL5//LRRK2//STAP1
GO:0007178	transmembrane receptor protein serine/threonine kinase signaling pathway	Biological process	9	336	224	17653	2.11093	0.028048	0.457414	1.5521	0.0401786	GDF7//BMP3//ROR2//GREM2//CDKN2B//TGFB1I1//MYOCD//SFRP2//FGF10
GO:1905330	regulation of morphogenesis of an epithelium	Biological process	6	181	224	17653	2.61242	0.0281478	0.457414	1.55056	0.0267857	ROR2//FGF10//HOXD13//SFRP2//PHLDB2//RSPO3
GO:0030001	metal ion transport	Biological process	18	868	224	17653	1.63427	0.0281558	0.457414	1.55043	0.0803571	KCNJ2//KCNJ5//KCNMA1//SLC17A4//SCN11A//RAMP1//PLN//TCN2//MYO5A//HCN4//JPH3//CCL21//IL16//CACNG4//KCNB1//SLC9A2//GCG//ARF1
GO:0010662	regulation of striated muscle cell apoptotic process	Biological process	3	52	224	17653	4.54662	0.0282541	0.457414	1.54892	0.0133929	SFRP2//MYOCD//HAND2
GO:0048168	regulation of neuronal synaptic plasticity	Biological process	3	52	224	17653	4.54662	0.0282541	0.457414	1.54892	0.0133929	SYNGR1//JPH3//CNTN2
GO:0051493	regulation of cytoskeleton organization	Biological process	12	506	224	17653	1.86897	0.0284159	0.457414	1.54644	0.0535714	CDC42EP1//LMOD1//CCL21//SYNPO2//GPM6B//ARF1//KAT2B//PHLDB2//SPTB//TRIM36//STAP1//NEXN
GO:0002376	immune system process	Biological process	50	3038	224	17653	1.29704	0.02842	0.457414	1.54638	0.223214	CCL21//TNFRSF13B//FCGR2B//SFTPA2//SLAMF7//TNFRSF17//CD1B//CD79B//ITM2A//HLA-DQB1//CHGA//C2//COL4A3BP//FAS//IL16//NGFR//CCL28//IL1R2//IGLL5//POU2AF1//STAP1//MMP28//RAB3B//ARF1//FYB2//CDKN2B//CFHR4//EVI2B//IKZF3//GLI3//VNN1//MEIS1//DHX58//PLA2G10//KLF2//FGL2//GCA//RAB44//SYNGR1//ROR2//KAT2B//CA2//LMO1//FGF10//HAND2//CLEC2B//MFAP5//SFRP2//GPR15//LRRK2
GO:0055024	regulation of cardiac muscle tissue development	Biological process	4	91	224	17653	3.46409	0.0286427	0.457414	1.54299	0.0178571	MEIS1//ZFPM2//NRG1//MYOCD
GO:0043586	tongue development	Biological process	2	21	224	17653	7.50553	0.0287292	0.457414	1.54168	0.00892857	GLI3//HAND2
GO:0048485	sympathetic nervous system development	Biological process	2	21	224	17653	7.50553	0.0287292	0.457414	1.54168	0.00892857	INSM1//HAND2
GO:0060216	definitive hemopoiesis	Biological process	2	21	224	17653	7.50553	0.0287292	0.457414	1.54168	0.00892857	MEIS1//MFAP5
GO:0071498	cellular response to fluid shear stress	Biological process	2	21	224	17653	7.50553	0.0287292	0.457414	1.54168	0.00892857	KLF2//CA2
GO:0098743	cell aggregation	Biological process	2	21	224	17653	7.50553	0.0287292	0.457414	1.54168	0.00892857	MGP//ROR2
GO:1904994	regulation of leukocyte adhesion to vascular endothelial cell	Biological process	2	21	224	17653	7.50553	0.0287292	0.457414	1.54168	0.00892857	CCL28//CCL21
GO:0048666	neuron development	Biological process	21	1060	224	17653	1.56129	0.0287448	0.457414	1.54144	0.09375	INSM1//GDF7//GLI3//KIF5C//MATN2//NGFR//SPTB//CNTN2//PLA2G10//SFRP2//MOB2//LRRK2//GPM6B//TMEM108//LGI4//NRG1//CHRNA3//HOXD9//HAND2//CTNND2//ARF1
GO:0010562	positive regulation of phosphorus metabolic process	Biological process	22	1126	224	17653	1.53977	0.0291822	0.4622	1.53488	0.0982143	LRRK2//FGF10//GNG3//NRG1//FAS//MOB2//CHRNA3//GCG//GDF7//BMP3//CHP2//RAMP1//CHGA//GUCA2B//SFRP2//ROR2//PRKAR2B//NGFR//CCL21//FCGR2B//HAND2//STAP1
GO:0045937	positive regulation of phosphate metabolic process	Biological process	22	1126	224	17653	1.53977	0.0291822	0.4622	1.53488	0.0982143	LRRK2//FGF10//GNG3//NRG1//FAS//MOB2//CHRNA3//GCG//GDF7//BMP3//CHP2//RAMP1//CHGA//GUCA2B//SFRP2//ROR2//PRKAR2B//NGFR//CCL21//FCGR2B//HAND2//STAP1
GO:1901654	response to ketone	Biological process	6	183	224	17653	2.58387	0.0294848	0.463342	1.5304	0.0267857	HOXD13//PLN//FOXP2//CCL21//SOX10//KLF2
GO:0006584	catecholamine metabolic process	Biological process	3	53	224	17653	4.46083	0.0296767	0.463342	1.52758	0.0133929	INSM1//VPS35//HAND2
GO:0009712	catechol-containing compound metabolic process	Biological process	3	53	224	17653	4.46083	0.0296767	0.463342	1.52758	0.0133929	INSM1//VPS35//HAND2
GO:0010656	negative regulation of muscle cell apoptotic process	Biological process	3	53	224	17653	4.46083	0.0296767	0.463342	1.52758	0.0133929	SFRP2//MYOCD//HAND2
GO:0010659	cardiac muscle cell apoptotic process	Biological process	3	53	224	17653	4.46083	0.0296767	0.463342	1.52758	0.0133929	SFRP2//MYOCD//HAND2
GO:0098900	regulation of action potential	Biological process	3	53	224	17653	4.46083	0.0296767	0.463342	1.52758	0.0133929	KCNJ2//HCN4//KCNB1
GO:0043062	extracellular structure organization	Biological process	10	395	224	17653	1.99514	0.0297339	0.463342	1.52675	0.0446429	CCDC80//MFAP5//DPT//SFRP2//LOXL4//PLTP//ARF1//MYH11//GPM6B//PHLDB2
GO:0010243	response to organonitrogen compound	Biological process	19	937	224	17653	1.59803	0.0298747	0.464467	1.5247	0.0848214	PDK4//CPEB1//PLN//MYO5A//KAT2B//CA2//SST//TRARG1//HCN4//SLC26A3//AQP8//GCG//GNG3//GNG7//PRKAR2B//KLF2//LRRK2//FCGR2B//NGFR
GO:1901698	response to nitrogen compound	Biological process	21	1065	224	17653	1.55396	0.0300384	0.46594	1.52232	0.09375	PDK4//CPEB1//PLN//MYO5A//KAT2B//CA2//SST//TRARG1//GSTM3//HCN4//SLC26A3//AQP8//GCG//GNG3//GNG7//PRKAR2B//KLF2//CHRNA3//LRRK2//FCGR2B//NGFR
GO:0006766	vitamin metabolic process	Biological process	5	137	224	17653	2.87621	0.0305772	0.469997	1.5146	0.0223214	TCN2//RLBP1//PLTP//VNN1//TTPA
GO:0031623	receptor internalization	Biological process	4	93	224	17653	3.38959	0.0306921	0.469997	1.51297	0.0178571	ARF1//CACNG4//RAMP1//CNTN2
GO:1904029	regulation of cyclin-dependent protein kinase activity	Biological process	4	93	224	17653	3.38959	0.0306921	0.469997	1.51297	0.0178571	CDKN2B//FGF10//KAT2B//MYOCD
GO:0030278	regulation of ossification	Biological process	6	185	224	17653	2.55594	0.0308628	0.469997	1.51056	0.0267857	MGP//GPM6B//HAND2//CLIC1//GLI3//SFRP2
GO:0060341	regulation of cellular localization	Biological process	17	815	224	17653	1.64385	0.0308911	0.469997	1.51017	0.0758929	PLN//CHRNA3//MYO5A//LRRK2//GCG//GPR27//GLI3//CHP2//RAB3B//GPM6B//JPH3//SLC51B//KCNB1//NGFR//ARF1//VPS35//NRG1
GO:0003229	ventricular cardiac muscle tissue development	Biological process	3	54	224	17653	4.37822	0.0311364	0.469997	1.50673	0.0133929	ZFPM2//NRG1//MYL2
GO:0007405	neuroblast proliferation	Biological process	3	54	224	17653	4.37822	0.0311364	0.469997	1.50673	0.0133929	GLI3//SOX10//LRRK2
GO:0034394	protein localization to cell surface	Biological process	3	54	224	17653	4.37822	0.0311364	0.469997	1.50673	0.0133929	GPM6B//NRG1//FGF10
GO:1904589	regulation of protein import	Biological process	3	54	224	17653	4.37822	0.0311364	0.469997	1.50673	0.0133929	LRRK2//GLI3//CHP2
GO:0002335	mature B cell differentiation	Biological process	2	22	224	17653	7.16437	0.0313424	0.469997	1.50387	0.00892857	FCGR2B//ITM2A
GO:0010758	regulation of macrophage chemotaxis	Biological process	2	22	224	17653	7.16437	0.0313424	0.469997	1.50387	0.00892857	STAP1//MMP28
GO:0060487	lung epithelial cell differentiation	Biological process	2	22	224	17653	7.16437	0.0313424	0.469997	1.50387	0.00892857	KLF2//FGF10
GO:1901685	glutathione derivative metabolic process	Biological process	2	22	224	17653	7.16437	0.0313424	0.469997	1.50387	0.00892857	HPGDS//GSTM3
GO:1901687	glutathione derivative biosynthetic process	Biological process	2	22	224	17653	7.16437	0.0313424	0.469997	1.50387	0.00892857	HPGDS//GSTM3
GO:2000050	regulation of non-canonical Wnt signaling pathway	Biological process	2	22	224	17653	7.16437	0.0313424	0.469997	1.50387	0.00892857	SFRP2//RSPO3
GO:0031668	cellular response to extracellular stimulus	Biological process	7	237	224	17653	2.32766	0.0319045	0.477368	1.49615	0.03125	MYOCD//LRRK2//PDK4//KCNB1//CDKN2B//FAS//SFRP2
GO:0010658	striated muscle cell apoptotic process	Biological process	3	55	224	17653	4.29862	0.0326333	0.485054	1.48634	0.0133929	SFRP2//MYOCD//HAND2
GO:0030801	positive regulation of cyclic nucleotide metabolic process	Biological process	3	55	224	17653	4.29862	0.0326333	0.485054	1.48634	0.0133929	RAMP1//CHGA//GUCA2B
GO:0060688	regulation of morphogenesis of a branching structure	Biological process	3	55	224	17653	4.29862	0.0326333	0.485054	1.48634	0.0133929	FGF10//HOXD13//LRRK2
GO:0018958	phenol-containing compound metabolic process	Biological process	4	95	224	17653	3.31823	0.0328259	0.486845	1.48378	0.0178571	INSM1//MYO5A//VPS35//HAND2
GO:0051051	negative regulation of transport	Biological process	11	460	224	17653	1.88454	0.0332922	0.490601	1.47766	0.0491071	CHGA//BEST3//FCGR2B//KCNB1//IL1R2//NRG1//GPM6B//PLN//PLA2G10//LRRK2//VPS35
GO:0032388	positive regulation of intracellular transport	Biological process	7	240	224	17653	2.29857	0.0338103	0.490601	1.47095	0.03125	LRRK2//GLI3//CHP2//SLC51B//KCNB1//ARF1//NRG1
GO:0001508	action potential	Biological process	5	141	224	17653	2.79461	0.0339999	0.490601	1.46852	0.0223214	KCNJ2//SCN11A//HCN4//KCNB1//KCNJ5
GO:0002691	regulation of cellular extravasation	Biological process	2	23	224	17653	6.85287	0.0340455	0.490601	1.46794	0.00892857	CCL28//CCL21
GO:0032402	melanosome transport	Biological process	2	23	224	17653	6.85287	0.0340455	0.490601	1.46794	0.00892857	MYO5A//MLPH
GO:0043032	positive regulation of macrophage activation	Biological process	2	23	224	17653	6.85287	0.0340455	0.490601	1.46794	0.00892857	LRRK2//STAP1
GO:0045956	positive regulation of calcium ion-dependent exocytosis	Biological process	2	23	224	17653	6.85287	0.0340455	0.490601	1.46794	0.00892857	KCNB1//ARF1
GO:0048520	positive regulation of behavior	Biological process	2	23	224	17653	6.85287	0.0340455	0.490601	1.46794	0.00892857	VPS35//INSL5
GO:0060479	lung cell differentiation	Biological process	2	23	224	17653	6.85287	0.0340455	0.490601	1.46794	0.00892857	KLF2//FGF10
GO:0071157	negative regulation of cell cycle arrest	Biological process	2	23	224	17653	6.85287	0.0340455	0.490601	1.46794	0.00892857	EVI2B//FGF10
GO:0086012	membrane depolarization during cardiac muscle cell action potential	Biological process	2	23	224	17653	6.85287	0.0340455	0.490601	1.46794	0.00892857	HCN4//KCNJ2
GO:0090140	regulation of mitochondrial fission	Biological process	2	23	224	17653	6.85287	0.0340455	0.490601	1.46794	0.00892857	VPS35//LRRK2
GO:0010043	response to zinc ion	Biological process	3	56	224	17653	4.22186	0.0341672	0.490601	1.46639	0.0133929	MT1A//PLN//CA2
GO:0046824	positive regulation of nucleocytoplasmic transport	Biological process	3	56	224	17653	4.22186	0.0341672	0.490601	1.46639	0.0133929	LRRK2//GLI3//CHP2
GO:0051057	positive regulation of small GTPase mediated signal transduction	Biological process	3	56	224	17653	4.22186	0.0341672	0.490601	1.46639	0.0133929	ABRA//FGF10//NRG1
GO:0031325	positive regulation of cellular metabolic process	Biological process	50	3074	224	17653	1.28185	0.034348	0.49152	1.4641	0.223214	LRRK2//FGF10//GNG3//NRG1//FAS//MOB2//MYOCD//NGFR//CHRNA3//KAT2B//CCL21//GCG//GDF7//BMP3//CHP2//SFRP2//CNTN2//KLF2//ABRA//GLI3//MDK//ROR2//POU3F3//SOX10//TGFB1I1//HAND2//RAMP1//CHGA//GUCA2B//PLA2G10//LONRF2//PRKAR2B//CDKN2B//IKZF3//ZFPM2//SSBP2//HOXD9//HOXD13//LMO1//MEIS1//MEOX2//POU2AF1//EBF4//SPIB//ASXL3//FCGR2B//SLC51B//NAP1L2//VPS35//STAP1
GO:0010033	response to organic substance	Biological process	52	3218	224	17653	1.27347	0.0344387	0.49152	1.46295	0.232143	HSPB2//PDK4//FGF10//SST//IL16//GREM2//IL1R2//CPEB1//GDF7//ROR2//BMP3//CDKN2B//TGFB1I1//MYOCD//SFRP2//FAS//NGFR//PLN//MYO5A//KAT2B//RAMP1//TNFRSF13B//TNFRSF17//HOXD13//FOXP2//KCNMA1//CCL21//ARF1//CA1//GCG//GPR27//CA2//TRARG1//MDK//TMEM108//HLA-DQB1//FCGR2B//STAP1//HCN4//SLC26A3//AQP8//KCNB1//KLF2//FABP4//GNG3//GNG7//PRKAR2B//SOX10//CHRNA3//LRRK2//PLA2G10//SYNGR1
GO:0006357	regulation of transcription by RNA polymerase II	Biological process	38	2227	224	17653	1.34473	0.0344493	0.49152	1.46282	0.169643	KLF2//ZFPM2//GLI3//HOXD9//INSM1//LMO1//MYOCD//FOXP2//KAT2B//GDF7//ROR2//GREM2//BMP3//SFRP2//GCG//CDKN2B//ABRA//FGF10//IKZF3//SSBP2//NRG1//HOXD13//MEIS1//MEOX2//POU2AF1//POU3F3//EBF4//CHP2//SOX10//SPIB//ASXL3//HAND2//NGFR//TCEAL2//TLX3//MBNL3//PKNOX2//DMRTA1
GO:0030036	actin cytoskeleton organization	Biological process	14	642	224	17653	1.71856	0.0348876	0.495735	1.45733	0.0625	LMOD1//ARF1//MYH11//CDC42EP1//CCL21//EPB41L4A//FGF10//SYNPO2//GPM6B//PHLDB2//SPTB//MYL2//STAP1//MOB2
GO:0071901	negative regulation of protein serine/threonine kinase activity	Biological process	5	142	224	17653	2.77493	0.0348913	0.495735	1.45728	0.0223214	CDKN2B//SFRP2//KAT2B//MYOCD//PRKAR2B
GO:0002027	regulation of heart rate	Biological process	4	97	224	17653	3.24982	0.0350444	0.496867	1.45538	0.0178571	PLN//HCN4//KCNJ2//KCNJ5
GO:0010810	regulation of cell-substrate adhesion	Biological process	6	191	224	17653	2.47565	0.0352475	0.498701	1.45287	0.0267857	NEXMIF//CCL28//CCL21//CCDC80//GPM6B//PHLDB2
GO:0031667	response to nutrient levels	Biological process	11	465	224	17653	1.86428	0.0355733	0.502259	1.44888	0.0491071	CCL28//SFRP2//SST//C2//TTPA//LRRK2//PDK4//KCNB1//CDKN2B//FAS//GCG
GO:0008016	regulation of heart contraction	Biological process	7	243	224	17653	2.27019	0.0357906	0.502272	1.44623	0.03125	CHGA//MYL2//PLN//HCN4//CACNG4//KCNJ2//KCNJ5
GO:0001764	neuron migration	Biological process	5	143	224	17653	2.75553	0.035797	0.502272	1.44615	0.0223214	CNTN2//NRG1//NEXMIF//TLX3//MATN2
GO:0061337	cardiac conduction	Biological process	5	143	224	17653	2.75553	0.035797	0.502272	1.44615	0.0223214	HCN4//KCNJ2//KCNJ5//PLN//CACNG4
GO:0090316	positive regulation of intracellular protein transport	Biological process	6	192	224	17653	2.46275	0.0360153	0.504289	1.44351	0.0267857	LRRK2//GLI3//CHP2//SLC51B//KCNB1//NRG1
GO:0043473	pigmentation	Biological process	4	98	224	17653	3.21665	0.0361856	0.505626	1.44146	0.0178571	GLI3//MYO5A//SOX10//MLPH
GO:0048598	embryonic morphogenesis	Biological process	13	586	224	17653	1.7483	0.036699	0.506344	1.43535	0.0580357	HAND2//GREM2//PHLDB2//TGFB1I1//GDF7//FGF10//ROR2//HOXD9//SFRP2//GLI3//HOXD13//EFEMP1//RSPO3
GO:0060541	respiratory system development	Biological process	6	193	224	17653	2.44999	0.0367938	0.506344	1.43422	0.0267857	ZFPM2//GLI3//MYOCD//FOXP2//FGF10//KLF2
GO:0031646	positive regulation of neurological system process	Biological process	2	24	224	17653	6.56734	0.0368359	0.506344	1.43373	0.00892857	NRG1//SOX10
GO:0032401	establishment of melanosome localization	Biological process	2	24	224	17653	6.56734	0.0368359	0.506344	1.43373	0.00892857	MYO5A//MLPH
GO:0035588	G-protein coupled purinergic receptor signaling pathway	Biological process	2	24	224	17653	6.56734	0.0368359	0.506344	1.43373	0.00892857	P2RY14//CNTN2
GO:0044381	glucose import in response to insulin stimulus	Biological process	2	24	224	17653	6.56734	0.0368359	0.506344	1.43373	0.00892857	NGFR//TRARG1
GO:0050901	leukocyte tethering or rolling	Biological process	2	24	224	17653	6.56734	0.0368359	0.506344	1.43373	0.00892857	CCL28//CCL21
GO:0051904	pigment granule transport	Biological process	2	24	224	17653	6.56734	0.0368359	0.506344	1.43373	0.00892857	MYO5A//MLPH
GO:0055025	positive regulation of cardiac muscle tissue development	Biological process	3	58	224	17653	4.07628	0.0373453	0.510272	1.42776	0.0133929	ZFPM2//NRG1//MYOCD
GO:0099175	regulation of postsynapse organization	Biological process	3	58	224	17653	4.07628	0.0373453	0.510272	1.42776	0.0133929	LRRK2//FCGR2B//VPS35
GO:0099024	plasma membrane invagination	Biological process	4	99	224	17653	3.18416	0.037348	0.510272	1.42773	0.0178571	IGLL5//FCGR2B//STAP1//ARF1
GO:0002009	morphogenesis of an epithelium	Biological process	12	528	224	17653	1.79109	0.0374985	0.511295	1.42599	0.0535714	SFRP2//GLI3//HAND2//TGFB1I1//GDF7//FGF10//ROR2//HOXD13//RSPO3//SOX10//PHLDB2//CA2
GO:0006836	neurotransmitter transport	Biological process	7	246	224	17653	2.24251	0.0378463	0.514998	1.42198	0.03125	NAAA//SYN2//CHRNA3//SLC36A1//RAB3B//GPM6B//LRRK2
GO:0007041	lysosomal transport	Biological process	4	100	224	17653	3.15232	0.0385318	0.522225	1.41418	0.0178571	CACNG4//VPS35//LRRK2//ARF1
GO:0030838	positive regulation of actin filament polymerization	Biological process	4	100	224	17653	3.15232	0.0385318	0.522225	1.41418	0.0178571	ARF1//LMOD1//CDC42EP1//CCL21
GO:0007040	lysosome organization	Biological process	3	59	224	17653	4.00719	0.0389892	0.526315	1.40906	0.0133929	LRRK2//ARF1//VPS35
GO:0080171	lytic vacuole organization	Biological process	3	59	224	17653	4.00719	0.0389892	0.526315	1.40906	0.0133929	LRRK2//VPS35//ARF1
GO:0032535	regulation of cellular component size	Biological process	9	358	224	17653	1.98121	0.0395485	0.528671	1.40287	0.0401786	CDC42EP1//LMOD1//CCL21//CNTN2//ARF1//NRG1//KCNMA1//SPTB//RAB3B
GO:0035725	sodium ion transmembrane transport	Biological process	5	147	224	17653	2.68055	0.0395644	0.528671	1.40269	0.0223214	HCN4//SLC9A2//ARF1//SLC17A4//SCN11A
GO:0001774	microglial cell activation	Biological process	2	25	224	17653	6.30464	0.0397109	0.528671	1.40109	0.00892857	LRRK2//STAP1
GO:0035640	exploration behavior	Biological process	2	25	224	17653	6.30464	0.0397109	0.528671	1.40109	0.00892857	LRRK2//JPH3
GO:0050927	positive regulation of positive chemotaxis	Biological process	2	25	224	17653	6.30464	0.0397109	0.528671	1.40109	0.00892857	FGF10//IL16
GO:0051905	establishment of pigment granule localization	Biological process	2	25	224	17653	6.30464	0.0397109	0.528671	1.40109	0.00892857	MYO5A//MLPH
GO:1904646	cellular response to amyloid-beta	Biological process	2	25	224	17653	6.30464	0.0397109	0.528671	1.40109	0.00892857	FCGR2B//NGFR
GO:0030097	hemopoiesis	Biological process	17	842	224	17653	1.59114	0.0401056	0.532877	1.39679	0.0758929	TNFRSF13B//FCGR2B//ITM2A//CD79B//CDKN2B//EVI2B//GLI3//VNN1//MEIS1//KLF2//IKZF3//ROR2//KAT2B//CA2//MFAP5//SFRP2//LMO1
GO:0045669	positive regulation of osteoblast differentiation	Biological process	3	60	224	17653	3.9404	0.0406694	0.538253	1.39073	0.0133929	CLIC1//GLI3//SFRP2
GO:0048747	muscle fiber development	Biological process	3	60	224	17653	3.9404	0.0406694	0.538253	1.39073	0.0133929	MYH11//NEXN//MYL2
GO:1900180	regulation of protein localization to nucleus	Biological process	4	102	224	17653	3.09051	0.0409632	0.541083	1.38761	0.0178571	LRRK2//GLI3//CHP2//NGFR
GO:0040012	regulation of locomotion	Biological process	19	973	224	17653	1.5389	0.041284	0.544257	1.38422	0.0848214	FGF10//STAP1//MMP28//NRG1//TMIGD1//SST//NEXN//INSM1//ROR2//SFRP2//CCL21//IL16//MEOX2//VPS35//CCL28//PHLDB2//MYOCD//NEXMIF//LRRK2
GO:0071695	anatomical structure maturation	Biological process	5	149	224	17653	2.64456	0.0415354	0.54549	1.38158	0.0223214	LRRK2//LGI4//KLF2//CNTN2//MYO5A
GO:0007188	adenylate cyclase-modulating G-protein coupled receptor signaling pathway	Biological process	6	199	224	17653	2.37612	0.0416913	0.54549	1.37995	0.0267857	RAMP1//GCG//GNAL//VIP//PLN//CHGA
GO:0035637	multicellular organismal signaling	Biological process	6	199	224	17653	2.37612	0.0416913	0.54549	1.37995	0.0267857	CACNG4//SCN11A//KCNJ2//HCN4//KCNJ5//PLN
GO:0030182	neuron differentiation	Biological process	24	1303	224	17653	1.45157	0.0420608	0.54549	1.37612	0.107143	HAND2//INSM1//GDF7//GLI3//KIF5C//MATN2//NGFR//SPTB//CNTN2//PLA2G10//SFRP2//MOB2//LRRK2//GPM6B//TMEM108//LGI4//TLX3//MEIS1//NAP1L2//NRG1//CHRNA3//HOXD9//CTNND2//ARF1
GO:0030888	regulation of B cell proliferation	Biological process	3	61	224	17653	3.87581	0.0423857	0.54549	1.37278	0.0133929	FCGR2B//TNFRSF13B//IKZF3
GO:0071496	cellular response to external stimulus	Biological process	8	307	224	17653	2.05363	0.0425967	0.54549	1.37062	0.0357143	MYOCD//LRRK2//PDK4//FAS//KCNJ2//CDKN2B//SFRP2//KCNB1
GO:0032400	melanosome localization	Biological process	2	26	224	17653	6.06216	0.0426681	0.54549	1.3699	0.00892857	MYO5A//MLPH
GO:0035235	ionotropic glutamate receptor signaling pathway	Biological process	2	26	224	17653	6.06216	0.0426681	0.54549	1.3699	0.00892857	GRIA3//GRIK1
GO:0048011	neurotrophin TRK receptor signaling pathway	Biological process	2	26	224	17653	6.06216	0.0426681	0.54549	1.3699	0.00892857	TMEM108//NGFR
GO:0050926	regulation of positive chemotaxis	Biological process	2	26	224	17653	6.06216	0.0426681	0.54549	1.3699	0.00892857	FGF10//IL16
GO:0060314	regulation of ryanodine-sensitive calcium-release channel activity	Biological process	2	26	224	17653	6.06216	0.0426681	0.54549	1.3699	0.00892857	PLN//JPH3
GO:0060740	prostate gland epithelium morphogenesis	Biological process	2	26	224	17653	6.06216	0.0426681	0.54549	1.3699	0.00892857	FGF10//HOXD13
GO:0071880	adenylate cyclase-activating adrenergic receptor signaling pathway	Biological process	2	26	224	17653	6.06216	0.0426681	0.54549	1.3699	0.00892857	PLN//CHGA
GO:0086013	membrane repolarization during cardiac muscle cell action potential	Biological process	2	26	224	17653	6.06216	0.0426681	0.54549	1.3699	0.00892857	KCNJ5//KCNJ2
GO:0120033	negative regulation of plasma membrane bounded cell projection assembly	Biological process	2	26	224	17653	6.06216	0.0426681	0.54549	1.3699	0.00892857	STAP1//CCL21
GO:1905521	regulation of macrophage migration	Biological process	2	26	224	17653	6.06216	0.0426681	0.54549	1.3699	0.00892857	STAP1//MMP28
GO:0045664	regulation of neuron differentiation	Biological process	13	600	224	17653	1.70751	0.0429625	0.548218	1.36691	0.0580357	SFRP2//MOB2//LRRK2//NGFR//CNTN2//GLI3//TLX3//MEIS1//GDF7//NAP1L2//NRG1//CHRNA3//ARF1
GO:0032869	cellular response to insulin stimulus	Biological process	6	201	224	17653	2.35248	0.0434109	0.552896	1.3624	0.0267857	PDK4//TRARG1//NGFR//MYO5A//CPEB1//KAT2B
GO:0032868	response to insulin	Biological process	7	254	224	17653	2.17188	0.0437033	0.55356	1.35949	0.03125	PDK4//MYO5A//CPEB1//KAT2B//TRARG1//NGFR//PLN
GO:0110053	regulation of actin filament organization	Biological process	7	254	224	17653	2.17188	0.0437033	0.55356	1.35949	0.03125	CDC42EP1//LMOD1//CCL21//SYNPO2//ARF1//PHLDB2//SPTB
GO:0032990	cell part morphogenesis	Biological process	14	663	224	17653	1.66412	0.0437085	0.55356	1.35943	0.0625	GDF7//GLI3//KIF5C//MATN2//NGFR//SPTB//CNTN2//PLA2G10//NRG1//LRRK2//CHRNA3//CTNND2//COL4A3BP//TMEM108
GO:0120035	regulation of plasma membrane bounded cell projection organization	Biological process	13	602	224	17653	1.70183	0.0439151	0.555136	1.35739	0.0580357	SFRP2//MOB2//LRRK2//NGFR//CNTN2//CDC42EP1//CCL21//NRG1//CHRNA3//ARF1//STAP1//FCGR2B//VPS35
GO:0048645	animal organ formation	Biological process	3	62	224	17653	3.81329	0.0441379	0.555874	1.35519	0.0133929	FGF10//HAND2//GLI3
GO:0072091	regulation of stem cell proliferation	Biological process	3	62	224	17653	3.81329	0.0441379	0.555874	1.35519	0.0133929	GLI3//SOX10//LRRK2
GO:0014013	regulation of gliogenesis	Biological process	4	105	224	17653	3.00221	0.0447703	0.562791	1.34901	0.0178571	SOX10//CNTN2//ASPA//STAP1
GO:0045665	negative regulation of neuron differentiation	Biological process	6	203	224	17653	2.3293	0.0451744	0.565229	1.34511	0.0267857	LRRK2//NGFR//GLI3//TLX3//MEIS1//CNTN2
GO:1902105	regulation of leukocyte differentiation	Biological process	7	256	224	17653	2.15491	0.045254	0.565229	1.34434	0.03125	EVI2B//VNN1//IKZF3//ROR2//CA2//GLI3//FCGR2B
GO:0021846	cell proliferation in forebrain	Biological process	2	27	224	17653	5.83763	0.0457047	0.565229	1.34004	0.00892857	POU3F3//GLI3
GO:0033173	calcineurin-NFAT signaling cascade	Biological process	2	27	224	17653	5.83763	0.0457047	0.565229	1.34004	0.00892857	NRG1//CHP2
GO:0051875	pigment granule localization	Biological process	2	27	224	17653	5.83763	0.0457047	0.565229	1.34004	0.00892857	MYO5A//MLPH
GO:0090314	positive regulation of protein targeting to membrane	Biological process	2	27	224	17653	5.83763	0.0457047	0.565229	1.34004	0.00892857	SLC51B//KCNB1
GO:1904645	response to amyloid-beta	Biological process	2	27	224	17653	5.83763	0.0457047	0.565229	1.34004	0.00892857	FCGR2B//NGFR
GO:2000727	positive regulation of cardiac muscle cell differentiation	Biological process	2	27	224	17653	5.83763	0.0457047	0.565229	1.34004	0.00892857	NRG1//MYOCD
GO:0051270	regulation of cellular component movement	Biological process	19	985	224	17653	1.52016	0.0457164	0.565229	1.33993	0.0848214	FGF10//STAP1//MMP28//NRG1//TMIGD1//SST//NEXN//INSM1//ROR2//SFRP2//KCNJ2//PLN//CCL21//MEOX2//HCN4//CCL28//PHLDB2//MYOCD//NEXMIF
GO:0002260	lymphocyte homeostasis	Biological process	3	63	224	17653	3.75276	0.0459257	0.56664	1.33794	0.0133929	TNFRSF13B//LMO1//TNFRSF17
GO:0001701	in utero embryonic development	Biological process	8	312	224	17653	2.02072	0.0460663	0.56664	1.33662	0.0357143	TTPA//RSPO3//COL4A3BP//KLF2//ZFPM2//GLI3//SOX10//HAND2
GO:0006939	smooth muscle contraction	Biological process	4	106	224	17653	2.97389	0.046082	0.56664	1.33647	0.0178571	CHRNA3//MYOCD//KCNMA1//MYH11
GO:0051222	positive regulation of protein transport	Biological process	10	427	224	17653	1.84562	0.0464001	0.569518	1.33348	0.0446429	LRRK2//GCG//GPR27//GLI3//CHP2//ARF1//VPS35//SLC51B//KCNB1//NRG1
GO:0009952	anterior/posterior pattern specification	Biological process	6	205	224	17653	2.30658	0.0469822	0.575617	1.32807	0.0267857	ROR2//MEOX2//SFRP2//GLI3//HOXD9//HOXD13
GO:0010324	membrane invagination	Biological process	4	107	224	17653	2.94609	0.0474149	0.579868	1.32409	0.0178571	IGLL5//FCGR2B//STAP1//ARF1
GO:0051937	catecholamine transport	Biological process	3	64	224	17653	3.69413	0.0477489	0.581849	1.32104	0.0133929	KCNB1//CHGA//RAB3B
GO:0060038	cardiac muscle cell proliferation	Biological process	3	64	224	17653	3.69413	0.0477489	0.581849	1.32104	0.0133929	MEIS1//ZFPM2//C3ORF58
GO:0046903	secretion	Biological process	28	1591	224	17653	1.38694	0.0478439	0.581958	1.32017	0.125	SCG3//MYO5A//VAMP1//KCNB1//RAB3B//NAAA//SYN2//GUCA2B//VIP//GCG//CHRNA3//PLA2G10//SLC51B//CHGA//GPR27//FGL2//GCA//RAB44//VNN1//SYNGR1//FCGR2B//ARF1//FGF10//IL1R2//NRG1//VPS35//LRRK2//CA2
GO:0010874	regulation of cholesterol efflux	Biological process	2	28	224	17653	5.62915	0.0488185	0.58619	1.31142	0.00892857	PLTP//PLA2G10
GO:0021799	cerebral cortex radially oriented cell migration	Biological process	2	28	224	17653	5.62915	0.0488185	0.58619	1.31142	0.00892857	GLI3//POU3F3
GO:0032594	protein transport within lipid bilayer	Biological process	2	28	224	17653	5.62915	0.0488185	0.58619	1.31142	0.00892857	CACNG4//VPS35
GO:0060292	long term synaptic depression	Biological process	2	28	224	17653	5.62915	0.0488185	0.58619	1.31142	0.00892857	KCNB1//ARF1
GO:0060512	prostate gland morphogenesis	Biological process	2	28	224	17653	5.62915	0.0488185	0.58619	1.31142	0.00892857	FGF10//HOXD13
GO:0007584	response to nutrient	Biological process	6	207	224	17653	2.28429	0.0488342	0.58619	1.31128	0.0267857	CDKN2B//CCL28//SFRP2//SST//C2//TTPA
GO:0099531	presynaptic process involved in chemical synaptic transmission	Biological process	5	156	224	17653	2.5259	0.0488955	0.58619	1.31073	0.0223214	NAAA//SYN2//CHRNA3//RAB3B//LRRK2
GO:0031344	regulation of cell projection organization	Biological process	13	612	224	17653	1.67403	0.0489013	0.58619	1.31068	0.0580357	SFRP2//MOB2//LRRK2//NGFR//CNTN2//CDC42EP1//CCL21//NRG1//CHRNA3//ARF1//STAP1//FCGR2B//VPS35
GO:0070997	neuron death	Biological process	8	316	224	17653	1.99514	0.048972	0.58619	1.31005	0.0357143	MDK//NGFR//LRRK2//CHGA//VPS35//FCGR2B//KCNB1//MEOX2
GO:0090066	regulation of anatomical structure size	Biological process	11	491	224	17653	1.76556	0.0492258	0.588188	1.30781	0.0491071	CDC42EP1//LMOD1//CCL21//CNTN2//ARF1//LRRK2//NRG1//KCNMA1//SPTB//RAB3B//CHGA

## Sheet: go CC down mRNA CA vs NC
GO.ID	Term	Ontology	Count	Pop.Hits	List.Total	Pop.Total	Fold.Enrichment	Pvalue	FDR	Enrichment.Score	Gene.Ratio	GENES
GO:0098797	plasma membrane protein complex	Cellular component	22	574	257	18698	2.78851	1.54815e-05	0.0132986	4.81019	0.0856031	RGS19//GNAL//GNG3//GNG7//SCN11A//CACNG4//KCNB1//KCNJ2//KCNJ5//KCNMA1//CNTN2//PGM5//CDH19//FAS//HCN4//HLA-DQB1//CHRNA3//CD79B//RAMP1//GRIA3//GRIK1//EVC
GO:0043292	contractile fiber	Cellular component	12	230	257	18698	3.79591	8.53018e-05	0.0231995	4.06904	0.0466926	MYH15//LMOD1//MYL2//CALD1//ABRA//ARF1//SYNM//PGM5//MYH11//SYNPO2//NEXN//KAT2B
GO:1902495	transmembrane transporter complex	Cellular component	14	321	257	18698	3.17311	0.000151583	0.0231995	3.81935	0.0544747	CHRNA3//CLIC1//BEST3//CACNG4//GRIA3//GRIK1//SCN11A//KCNB1//KCNJ2//KCNJ5//KCNMA1//CNTN2//PLN//HCN4
GO:0005886	plasma membrane	Cellular component	103	5503	257	18698	1.36176	0.000154682	0.0231995	3.81056	0.400778	SCEL//SYNM//KCNB1//PGM5//KCNJ2//KCNJ5//RGS19//GNAL//GNG3//GNG7//SCN11A//FYB2//HLA-DQB1//HCN4//SLC17A4//TSPAN1//RAMP1//CHRNA3//SLC26A3//EVI2B//FCGR2B//TNFRSF13B//VSIG2//CACNG4//GPR15//GRIK1//NRG1//AQP8//FAS//NGFR//ROR2//VAMP1//CNTN2//TAAR5//SLC28A2//CD69//CD79B//P2RY14//CLEC2B//KCNMA1//IGLL5//SLC51B//CA2//CLDN8//NPC1L1//SI//CA4//CDH19//SPTB//CYBRD1//GRIA3//ARHGEF4//ARF1//CPEB1//TMEM108//CYS1//EVC/…
GO:1990351	transporter complex	Cellular component	14	329	257	18698	3.09595	0.000195545	0.0231995	3.70875	0.0544747	CHRNA3//CACNG4//GRIA3//GRIK1//CLIC1//BEST3//PLN//SCN11A//KCNB1//KCNJ2//KCNJ5//KCNMA1//CNTN2//HCN4
GO:0071944	cell periphery	Cellular component	104	5614	257	18698	1.34779	0.000214147	0.0231995	3.66929	0.404669	HCN4//CLDN34//TSPAN1//RAMP1//CDC42EP1//SCN11A//CHRNA3//RAB39B//CLIC1//LRRK2//SLC51B//ADH1B//ABRA//PTCHD1//BEST3//SLC26A3//SLC36A1//FCGR2B//FGF10//IKZF3//TNFRSF13B//PIGN//GCA//GCG//CACNG4//FILIP1//GNAL//GNG3//GNG7//GPM6B//GPR15//GPR27//CDH19//TRARG1//GRIA3//GRIK1//NPC1L1//HLA-DQB1//AQP8//FAS//IL16//KCNB1//ARF1//KCNJ2//KCNJ5//KCNMA1//TMIGD1//OR11G2//RAB44//NGFR//ROR2//PNOC//DIRAS2//LIMS2//PRKAR2B//…
GO:0030016	myofibril	Cellular component	11	219	257	18698	3.65435	0.000233459	0.0231995	3.63179	0.0428016	ABRA//LMOD1//ARF1//MYL2//SYNM//PGM5//KAT2B//SYNPO2//NEXN//MYH15//CALD1
GO:0044456	synapse part	Cellular component	23	740	257	18698	2.2613	0.000239117	0.0231995	3.62139	0.0894942	RAB3B//LRRK2//VAMP1//SYN2//SYNGR1//NAAA//GRIK1//CHRNA3//GRIA3//KCNB1//ARF1//KCNMA1//CPEB1//TMEM108//SCGN//CALB2//PNOC//FCGR2B//KCNJ2//PRKAR2B//GNG3//VPS35//CACNG4
GO:0034702	ion channel complex	Cellular component	13	296	257	18698	3.19531	0.000243068	0.0231995	3.61427	0.0505837	CHRNA3//CLIC1//BEST3//CACNG4//GRIA3//GRIK1//SCN11A//KCNB1//KCNJ2//KCNJ5//KCNMA1//CNTN2//HCN4
GO:0098796	membrane protein complex	Cellular component	31	1166	257	18698	1.93431	0.000328723	0.0282373	3.48317	0.120623	VPS35//VAMP1//EVC//RGS19//GNAL//GNG3//GNG7//SCN11A//CACNG4//KCNB1//KCNJ2//KCNJ5//KCNMA1//CNTN2//PGM5//CDH19//FAS//NDUFC1//FOXRED1//C15ORF48//HCN4//C3ORF58//CHRNA3//GRIA3//GRIK1//CLIC1//BEST3//HLA-DQB1//PLN//CD79B//RAMP1
GO:0005903	brush border	Cellular component	7	98	257	18698	5.19678	0.000407946	0.0310617	3.3894	0.0272374	SLC26A3//NPC1L1//CA4//CYBRD1//RGS19//CLIC1//SI
GO:0034705	potassium channel complex	Cellular component	7	99	257	18698	5.14428	0.000433923	0.0310617	3.36259	0.0272374	KCNB1//KCNJ2//KCNJ5//KCNMA1//CNTN2//GRIK1//HCN4
GO:0045202	synapse	Cellular component	25	880	257	18698	2.0669	0.000493949	0.0318274	3.30632	0.0972763	NRG1//SYNGR1//CHRNA3//GNG3//ARF1//VPS35//CPEB1//TMEM108//RAB3B//LRRK2//VAMP1//SYN2//GRIK1//SCGN//CALB2//FCGR2B//KCNJ2//PRKAR2B//PNOC//GRIA3//KCNB1//KCNMA1//NAAA//CACNG4//CNTN2
GO:0030658	transport vesicle membrane	Cellular component	10	203	257	18698	3.58398	0.000520066	0.0318274	3.28394	0.0389105	HLA-DQB1//LRRK2//VAMP1//SYN2//SYNGR1//RAB3B//SCGN//CHGA//SCG3//CA4
GO:0097458	neuron part	Cellular component	37	1533	257	18698	1.75599	0.000555776	0.0318274	3.2551	0.143969	GUCA2B//MYO5A//RAB3B//CHRNA3//GNG3//ARF1//VPS35//CPEB1//TMEM108//SCGN//RAB39B//LRRK2//KIF5C//NGFR//CALB2//VAMP1//SYN2//SYNGR1//KCNB1//CACNG4//GRIK1//KCNJ2//ROR2//PNOC//PRKAR2B//SST//CNTN2//CTNND2//MOB2//SYNM//NAAA//GRIA3//CA2//NRG1//MLPH//FCGR2B//SCN11A
GO:0044463	cell projection part	Cellular component	34	1377	257	18698	1.79642	0.000637856	0.0322305	3.19528	0.132296	SCGN//CHRNA3//LRRK2//CTNND2//GNG3//NRG1//KCNB1//ROR2//PNOC//CPEB1//TMEM108//MLPH//CALB2//MYO5A//FCGR2B//KCNJ2//PRKAR2B//MOB2//SLC26A3//NPC1L1//CA4//CYBRD1//ARHGEF4//CYS1//EVC//CNTN2//VAMP1//SYNGR1//GUCA2B//CFAP54//GLI3//KIF5C//GSTM3//CEP170
GO:0120038	plasma membrane bounded cell projection part	Cellular component	34	1377	257	18698	1.79642	0.000637856	0.0322305	3.19528	0.132296	SCGN//CHRNA3//LRRK2//CTNND2//GNG3//NRG1//KCNB1//ROR2//PNOC//CPEB1//TMEM108//MLPH//CALB2//MYO5A//FCGR2B//KCNJ2//PRKAR2B//MOB2//SLC26A3//NPC1L1//CA4//CYBRD1//ARHGEF4//CYS1//EVC//CNTN2//VAMP1//SYNGR1//GUCA2B//CFAP54//GLI3//KIF5C//GSTM3//CEP170
GO:0044449	contractile fiber part	Cellular component	10	214	257	18698	3.39976	0.000782436	0.0373396	3.10655	0.0389105	MYH11//ABRA//LMOD1//ARF1//MYL2//SYNPO2//PGM5//NEXN//KAT2B//SYNM
GO:0034703	cation channel complex	Cellular component	10	217	257	18698	3.35276	0.000870372	0.03935	3.0603	0.0389105	CACNG4//GRIA3//KCNB1//KCNJ2//KCNJ5//KCNMA1//CNTN2//GRIK1//SCN11A//HCN4
GO:0005834	heterotrimeric G-protein complex	Cellular component	4	36	257	18698	8.08387	0.00145334	0.0577638	2.83763	0.0155642	RGS19//GNAL//GNG3//GNG7
GO:1905360	GTPase complex	Cellular component	4	36	257	18698	8.08387	0.00145334	0.0577638	2.83763	0.0155642	RGS19//GNAL//GNG3//GNG7
GO:0098794	postsynapse	Cellular component	15	450	257	18698	2.42516	0.0014794	0.0577638	2.82991	0.0583658	FCGR2B//KCNJ2//PRKAR2B//CHRNA3//GRIA3//GRIK1//KCNB1//ARF1//KCNMA1//CPEB1//TMEM108//GNG3//VPS35//CACNG4//LRRK2
GO:0008076	voltage-gated potassium channel complex	Cellular component	6	92	257	18698	4.74488	0.00169173	0.0631824	2.77167	0.0233463	HCN4//KCNB1//KCNJ2//KCNJ5//KCNMA1//CNTN2
GO:0044297	cell body	Cellular component	16	513	257	18698	2.26916	0.00204694	0.0732634	2.68889	0.0622568	CHRNA3//LRRK2//KCNJ2//MYO5A//ROR2//PNOC//VPS35//PRKAR2B//SST//CNTN2//KCNB1//CTNND2//FCGR2B//GNG3//NRG1//RLBP1
GO:0036477	somatodendritic compartment	Cellular component	21	766	257	18698	1.99459	0.00214378	0.0736604	2.66882	0.0817121	CHRNA3//LRRK2//KCNJ2//MYO5A//ROR2//PNOC//VPS35//PRKAR2B//SST//CNTN2//KCNB1//CTNND2//SCGN//GNG3//NRG1//CPEB1//TMEM108//MLPH//CALB2//FCGR2B//CACNG4
GO:0044459	plasma membrane part	Cellular component	56	2830	257	18698	1.43967	0.00266502	0.0880481	2.5743	0.217899	FYB2//IGLL5//FCGR2B//NRG1//KCNJ5//CD69//CD79B//PGM5//KCNB1//KCNJ2//HCN4//EVC//SLC17A4//TSPAN1//RAMP1//CHRNA3//SLC26A3//EVI2B//TNFRSF13B//VSIG2//CACNG4//GPR15//GRIK1//AQP8//FAS//NGFR//ROR2//VAMP1//CNTN2//TAAR5//SLC28A2//P2RY14//CLEC2B//SPTB//ARHGEF4//SLC51B//CA2//CLDN8//NPC1L1//KCNMA1//SI//CA4//LRRK2//RGS19//GNAL//GNG3//GNG7//SCN11A//CDH19//CYBRD1//CYS1//HLA-DQB1//GRIA3//ARF1//CPEB1//TMEM108
GO:0043195	terminal bouton	Cellular component	5	71	257	18698	5.12358	0.00293657	0.0912015	2.53216	0.0194553	SCGN//LRRK2//VAMP1//CALB2//SYNGR1
GO:0043005	neuron projection	Cellular component	29	1224	257	18698	1.72377	0.00297281	0.0912015	2.52683	0.11284	LRRK2//KCNB1//ROR2//TMEM108//CA2//SCGN//CHRNA3//CTNND2//GNG3//NRG1//PNOC//CPEB1//MLPH//CALB2//MOB2//SCN11A//FCGR2B//KCNJ2//PRKAR2B//GUCA2B//MYO5A//CNTN2//VAMP1//SYNGR1//RAB39B//ARF1//KIF5C//NGFR//VPS35
GO:0044306	neuron projection terminus	Cellular component	7	139	257	18698	3.66391	0.00313274	0.092794	2.50408	0.0272374	PNOC//SCGN//LRRK2//VAMP1//CALB2//SYNGR1//MOB2
GO:0098862	cluster of actin-based cell projections	Cellular component	7	145	257	18698	3.5123	0.00395581	0.113268	2.40276	0.0272374	RGS19//CLIC1//SI//SLC26A3//NPC1L1//CA4//CYBRD1
GO:0044421	extracellular region part	Cellular component	77	4254	257	18698	1.31691	0.00427244	0.114879	2.36932	0.299611	FGL2//RAMP1//CHGA//CLIC1//LRRK2//GDF7//CCDC80//LGI4//DPT//C3ORF58//EFEMP1//FGF10//GCG//NRG1//IGFALS//IL16//MATN2//PLTP//PRH1//CCL21//SFRP2//GREM2//LYPD8//BMP3//SST//TCN2//C2//SFTPA2//MFAP5//PLA2G10//SPARCL1//LOXL4//MGP//TGFB1I1//MMP28//IGLL5//GSTM3//PKNOX2//MAMDC2//TSPAN1//BPNT1//SCN11A//CMBL//KRT24//CYS1//FABP4//TXNDC8//GCA//NAAA//GNAL//GNG7//GUCA2B//FAS//ARF1//KCNMA1//ASPA//MYH11//MYO5A//NXPE4/…
GO:0014069	postsynaptic density	Cellular component	9	227	257	18698	2.88455	0.00427956	0.114879	2.3686	0.0350195	CACNG4//GRIA3//GRIK1//CHRNA3//GNG3//ARF1//VPS35//CPEB1//TMEM108
GO:0099572	postsynaptic specialization	Cellular component	9	229	257	18698	2.85936	0.00453011	0.115923	2.34389	0.0350195	CHRNA3//GNG3//ARF1//VPS35//CPEB1//TMEM108//CACNG4//GRIA3//GRIK1
GO:0098552	side of membrane	Cellular component	15	509	257	18698	2.14405	0.00472716	0.115923	2.3254	0.0583658	IGLL5//FCGR2B//NRG1//KCNJ5//CD69//CD79B//PGM5//LRRK2//SPTB//HLA-DQB1//CA4//RGS19//GNAL//GNG3//GNG7
GO:0005576	extracellular region	Cellular component	88	5012	257	18698	1.27742	0.00487872	0.115923	2.31169	0.342412	MFAP5//FGL2//DPT//EFEMP1//MAMDC2//MATN2//MGP//SFTPA2//MMP28//SPARCL1//CCDC80//RAMP1//CHGA//CLIC1//LRRK2//GDF7//LGI4//C3ORF58//FGF10//GCG//NRG1//IGFALS//IL16//PLTP//PRH1//CCL21//SFRP2//GREM2//LYPD8//BMP3//SST//TCN2//C2//PLA2G10//LOXL4//TGFB1I1//IGLL5//GSTM3//PKNOX2//TSPAN1//BPNT1//SCN11A//CMBL//KRT24//CYS1//FABP4//TXNDC8//GCA//NAAA//GNAL//GNG7//GUCA2B//FAS//ARF1//KCNMA1//ASPA//MYH11//MYO5A//NXPE4/…
GO:0032279	asymmetric synapse	Cellular component	9	232	257	18698	2.82239	0.0049272	0.115923	2.3074	0.0350195	CHRNA3//GNG3//ARF1//VPS35//CPEB1//TMEM108//CACNG4//GRIA3//GRIK1
GO:0120025	plasma membrane bounded cell projection	Cellular component	41	1980	257	18698	1.50654	0.0049932	0.115923	2.30162	0.159533	MYO5A//CYS1//EVC//GLI3//SCGN//CHRNA3//RAB39B//LRRK2//ARF1//KIF5C//NGFR//VPS35//CPEB1//CALB2//KCNB1//ROR2//TMEM108//CA2//CTNND2//GNG3//NRG1//PNOC//MLPH//FCGR2B//KCNJ2//PRKAR2B//SCN11A//TXNDC8//ARHGEF4//MOB2//GSTM3//SLC26A3//GUCA2B//CFAP54//NPC1L1//CA4//CYBRD1//CNTN2//VAMP1//SYNGR1//CEP170
GO:0098984	neuron to neuron synapse	Cellular component	9	235	257	18698	2.78636	0.00535084	0.115948	2.27158	0.0350195	CHRNA3//GNG3//ARF1//VPS35//CPEB1//TMEM108//CACNG4//GRIA3//GRIK1
GO:0030425	dendrite	Cellular component	16	569	257	18698	2.04583	0.00557712	0.115948	2.25359	0.0622568	KCNB1//LRRK2//FCGR2B//KCNJ2//PRKAR2B//SCGN//CHRNA3//CTNND2//GNG3//NRG1//ROR2//PNOC//CPEB1//TMEM108//MLPH//CALB2
GO:0031526	brush border membrane	Cellular component	4	52	257	18698	5.59653	0.00562868	0.115948	2.24959	0.0155642	SLC26A3//NPC1L1//CA4//CYBRD1
GO:0042995	cell projection	Cellular component	42	2055	257	18698	1.48696	0.00562917	0.115948	2.24956	0.163424	MYO5A//CYS1//EVC//GLI3//SCGN//CHRNA3//RAB39B//LRRK2//ARF1//KIF5C//NGFR//VPS35//CPEB1//CALB2//KCNB1//ROR2//TMEM108//CA2//CTNND2//GNG3//NRG1//PNOC//MLPH//FCGR2B//KCNJ2//PRKAR2B//SCN11A//TXNDC8//ARHGEF4//MOB2//GSTM3//SLC26A3//GUCA2B//CFAP54//NPC1L1//CA4//CYBRD1//CNTN2//VAMP1//SYNGR1//CEP170//MDK
GO:0097447	dendritic tree	Cellular component	16	570	257	18698	2.04224	0.00566915	0.115948	2.24648	0.0622568	SCGN//CHRNA3//LRRK2//CTNND2//GNG3//NRG1//KCNB1//ROR2//PNOC//CPEB1//TMEM108//MLPH//CALB2//FCGR2B//KCNJ2//PRKAR2B
GO:0005615	extracellular space	Cellular component	73	4040	257	18698	1.31463	0.00585183	0.116901	2.23271	0.284047	FGL2//IGLL5//TSPAN1//BPNT1//SCN11A//CLIC1//LRRK2//CMBL//DPT//KRT24//CYS1//FABP4//EFEMP1//TXNDC8//GCA//NAAA//GNAL//GNG7//GSTM3//GUCA2B//IGFALS//FAS//ARF1//KCNMA1//MGP//ASPA//MYH11//MYO5A//NXPE4//TRIM36//VPS35//PRKAR2B//PRPH//CCL28//LXN//RAB3B//SI//BMP3//TCN2//C2//CA1//CA2//CA4//MLPH//CYBRD1//SPARCL1//LOXL4//BCAS1//SCEL//VNN1//ITM2A//CD79B//PLTP//RAMP1//CHGA//GDF7//CCDC80//LGI4//C3ORF58//FGF10//GCG…
GO:0030017	sarcomere	Cellular component	8	197	257	18698	2.95451	0.00601562	0.117441	2.22072	0.0311284	LMOD1//MYL2//KAT2B//SYNPO2//PGM5//NEXN//ABRA//ARF1
GO:0045211	postsynaptic membrane	Cellular component	9	244	257	18698	2.68358	0.00679262	0.129664	2.16796	0.0350195	CACNG4//GRIA3//GRIK1//CHRNA3//KCNB1//ARF1//KCNMA1//CPEB1//TMEM108
GO:0043679	axon terminus	Cellular component	6	123	257	18698	3.54902	0.00710016	0.132588	2.14873	0.0233463	SCGN//LRRK2//VAMP1//CALB2//SYNGR1//PNOC
GO:0015629	actin cytoskeleton	Cellular component	14	487	257	18698	2.09152	0.00770511	0.140823	2.11322	0.0544747	LMOD1//MYO5A//MYL2//MLPH//KAT2B//MYH11//MYH15//SYNPO2//PGM5//SPTB//CALD1//ABRA//FILIP1//PKNOX2
GO:0031982	vesicle	Cellular component	77	4372	257	18698	1.28136	0.00865634	0.154912	2.06267	0.299611	RGS19//LRRK2//CD164L2//RAB3B//IGLL5//TSPAN1//BPNT1//FGL2//SCN11A//CLIC1//CMBL//DPT//KRT24//CYS1//FABP4//EFEMP1//TXNDC8//GCA//NAAA//GNAL//GNG7//GSTM3//GUCA2B//IGFALS//FAS//ARF1//KCNMA1//MGP//ASPA//MYH11//MYO5A//NXPE4//TRIM36//VPS35//PRKAR2B//PRPH//CCL28//LXN//SI//BMP3//TCN2//C2//CA1//CA2//CA4//MLPH//CYBRD1//SPARCL1//LOXL4//BCAS1//SCEL//VNN1//ITM2A//CD79B//GPR15//NGFR//TMEM108//TTPA//CHGA//SYNGR1//…
GO:0030659	cytoplasmic vesicle membrane	Cellular component	19	761	257	18698	1.81648	0.00912656	0.159994	2.03969	0.07393	SCGN//CHGA//SCG3//HLA-DQB1//CA4//CACNG4//GRIA3//RAB44//VNN1//SYNGR1//VAMP1//ROR2//LRRK2//SYN2//C3ORF58//RAB3B//RAB39B//TRARG1//NPC1L1
GO:0098839	postsynaptic density membrane	Cellular component	3	32	257	18698	6.82077	0.00948593	0.162968	2.02292	0.0116732	CACNG4//GRIA3//GRIK1
GO:0099634	postsynaptic specialization membrane	Cellular component	3	34	257	18698	6.41955	0.0112168	0.184375	1.95013	0.0116732	CACNG4//GRIA3//GRIK1
GO:0030672	synaptic vesicle membrane	Cellular component	5	98	257	18698	3.71198	0.0113759	0.184375	1.94402	0.0194553	RAB3B//LRRK2//VAMP1//SYN2//SYNGR1
GO:0099501	exocytic vesicle membrane	Cellular component	5	98	257	18698	3.71198	0.0113759	0.184375	1.94402	0.0194553	LRRK2//VAMP1//SYN2//SYNGR1//RAB3B
GO:0012506	vesicle membrane	Cellular component	19	781	257	18698	1.76996	0.0117852	0.187472	1.92866	0.07393	RAB39B//TRARG1//NPC1L1//SCGN//CHGA//SCG3//HLA-DQB1//CA4//CACNG4//GRIA3//LRRK2//VAMP1//SYN2//SYNGR1//RAB44//VNN1//ROR2//C3ORF58//RAB3B
GO:0044425	membrane part	Cellular component	111	6780	257	18698	1.19112	0.012504	0.19529	1.90295	0.431907	COL4A3BP//SHISA3//PIGN//JPH3//SFTPA2//KCNJ2//PLN//CLDN34//SLC17A4//CHRNA3//NXPE2//SLC51B//PTCHD1//MFSD4A//APCDD1L//SLC36A1//EVC//MS4A6E//GPM6B//C16ORF54//GPR27//CDH19//TRARG1//SHISAL2A//KCNB1//KCNMA1//KLRC3//TMIGD1//CD164L2//SMIM32//OR11G2//FAM180B//PRRT4//NDUFC1//NGFR//MS4A12//FOXRED1//RNF150//SLAMF7//MS4A7//TNFRSF17//SFRP2//PIRT//HRCT1//SI//SLC9A2//TMEM108//IL1R2//CYBRD1//KLRC4//MS4A8//FIBCD1//…
GO:0042641	actomyosin	Cellular component	4	66	257	18698	4.40939	0.0129142	0.198094	1.88893	0.0155642	SYNPO2//PGM5//MYO5A//KAT2B
GO:0031226	intrinsic component of plasma membrane	Cellular component	35	1741	257	18698	1.46262	0.0144343	0.217528	1.8406	0.136187	HCN4//SLC17A4//TSPAN1//RAMP1//CHRNA3//SLC26A3//EVI2B//FCGR2B//TNFRSF13B//VSIG2//CACNG4//GPR15//GRIK1//NRG1//AQP8//FAS//KCNJ2//NGFR//ROR2//VAMP1//CNTN2//TAAR5//SLC28A2//CD69//CD79B//P2RY14//CLEC2B//SPTB//CA4//NPC1L1//SCN11A//KCNB1//KCNJ5//KCNMA1//GRIA3
GO:0070062	extracellular exosome	Cellular component	52	2817	257	18698	1.34301	0.0148065	0.219289	1.82955	0.202335	IGLL5//TSPAN1//BPNT1//FGL2//SCN11A//CLIC1//LRRK2//CMBL//DPT//KRT24//CYS1//FABP4//EFEMP1//TXNDC8//GCA//NAAA//GNAL//GNG7//GSTM3//GUCA2B//IGFALS//FAS//ARF1//KCNMA1//MGP//ASPA//MYH11//MYO5A//NXPE4//TRIM36//VPS35//PRKAR2B//PRPH//CCL28//LXN//RAB3B//SI//BMP3//TCN2//C2//CA1//CA2//CA4//MLPH//CYBRD1//SPARCL1//LOXL4//BCAS1//SCEL//VNN1//ITM2A//CD79B
GO:0031012	extracellular matrix	Cellular component	13	479	257	18698	1.97456	0.0155824	0.22687	1.80736	0.0505837	DPT//EFEMP1//MAMDC2//MATN2//MGP//SFTPA2//MMP28//MFAP5//SPARCL1//CCDC80//FGF10//SFRP2//TGFB1I1
GO:0016459	myosin complex	Cellular component	4	71	257	18698	4.09887	0.0165138	0.230251	1.78215	0.0155642	MYO5A//MYH15//MYH11//MYL2
GO:0016020	membrane	Cellular component	147	9426	257	18698	1.13462	0.0165317	0.230251	1.78168	0.571984	HCN4//CLDN34//TSPAN1//RAMP1//CDC42EP1//SCN11A//CHRNA3//RAB39B//CLIC1//LRRK2//SLC51B//ADH1B//ABRA//PTCHD1//BEST3//SLC26A3//SLC36A1//FCGR2B//FGF10//IKZF3//TNFRSF13B//PIGN//GCA//GCG//CACNG4//FILIP1//GNAL//GNG3//GNG7//GPM6B//GPR15//GPR27//CDH19//TRARG1//GRIA3//GRIK1//NPC1L1//HLA-DQB1//AQP8//FAS//IL16//KCNB1//ARF1//KCNJ2//KCNJ5//KCNMA1//TMIGD1//OR11G2//RAB44//NGFR//ROR2//PNOC//DIRAS2//LIMS2//PRKAR2B//…
GO:1903561	extracellular vesicle	Cellular component	52	2837	257	18698	1.33354	0.0167962	0.230251	1.77479	0.202335	IGLL5//TSPAN1//BPNT1//FGL2//SCN11A//CLIC1//LRRK2//CMBL//DPT//KRT24//CYS1//FABP4//EFEMP1//TXNDC8//GCA//NAAA//GNAL//GNG7//GSTM3//GUCA2B//IGFALS//FAS//ARF1//KCNMA1//MGP//ASPA//MYH11//MYO5A//NXPE4//TRIM36//VPS35//PRKAR2B//PRPH//CCL28//LXN//RAB3B//SI//BMP3//TCN2//C2//CA1//CA2//CA4//MLPH//CYBRD1//SPARCL1//LOXL4//BCAS1//SCEL//VNN1//ITM2A//CD79B
GO:0043230	extracellular organelle	Cellular component	52	2839	257	18698	1.3326	0.0170067	0.230251	1.76938	0.202335	IGLL5//TSPAN1//BPNT1//FGL2//SCN11A//CLIC1//LRRK2//CMBL//DPT//KRT24//CYS1//FABP4//EFEMP1//TXNDC8//GCA//NAAA//GNAL//GNG7//GSTM3//GUCA2B//IGFALS//FAS//ARF1//KCNMA1//MGP//ASPA//MYH11//MYO5A//NXPE4//TRIM36//VPS35//PRKAR2B//PRPH//CCL28//LXN//RAB3B//SI//BMP3//TCN2//C2//CA1//CA2//CA4//MLPH//CYBRD1//SPARCL1//LOXL4//BCAS1//SCEL//VNN1//ITM2A//CD79B
GO:0030424	axon	Cellular component	14	538	257	18698	1.89325	0.0171549	0.230251	1.76561	0.0544747	SCN11A//LRRK2//MYO5A//NRG1//CNTN2//SCGN//VAMP1//CALB2//SYNGR1//PNOC//TMEM108//KCNB1//ROR2//CA2
GO:0098562	cytoplasmic side of membrane	Cellular component	7	199	257	18698	2.55922	0.0203847	0.269391	1.6907	0.0272374	PGM5//LRRK2//SPTB//RGS19//GNAL//GNG3//GNG7
GO:0031224	intrinsic component of membrane	Cellular component	91	5506	257	18698	1.20245	0.0218654	0.278451	1.66024	0.354086	CLDN34//SLC17A4//CHRNA3//NXPE2//SLC51B//PTCHD1//MFSD4A//SHISA3//APCDD1L//SLC36A1//EVC//PIGN//MS4A6E//GPM6B//C16ORF54//GPR27//CDH19//TRARG1//SHISAL2A//KCNB1//KCNMA1//KLRC3//TMIGD1//CD164L2//SMIM32//OR11G2//FAM180B//PRRT4//NDUFC1//NGFR//MS4A12//FOXRED1//JPH3//RNF150//SLAMF7//MS4A7//TNFRSF17//SFRP2//PIRT//HRCT1//SI//SLC9A2//TMEM108//IL1R2//CYBRD1//KLRC4//MS4A8//FIBCD1//VNN1//CLDN8//CD1B//SYNGR1//TME…
GO:0043025	neuronal cell body	Cellular component	12	449	257	18698	1.94445	0.0219154	0.278451	1.65925	0.0466926	KCNB1//LRRK2//CTNND2//CHRNA3//KCNJ2//MYO5A//ROR2//PNOC//VPS35//PRKAR2B//SST//CNTN2
GO:0030054	cell junction	Cellular component	26	1247	257	18698	1.51694	0.0223946	0.278451	1.64986	0.101167	CDC42EP1//CDH19//PGM5//CALB2//CTNND2//SYNM//CLDN34//CLDN8//KCNJ2//SYNPO2//ARF1//LIMS2//TGFB1I1//PHLDB2//NEXN//TSPAN1//CHRNA3//LRRK2//GRIA3//GRIK1//KCNB1//CPEB1//TMEM108//VAMP1//SYN2//SYNGR1
GO:0098590	plasma membrane region	Cellular component	23	1069	257	18698	1.56535	0.0224814	0.278451	1.64818	0.0894942	SLC51B//CA2//CLDN8//SLC17A4//SLC26A3//NPC1L1//KCNMA1//SI//CA4//CHRNA3//LRRK2//CYBRD1//ARHGEF4//CYS1//EVC//GRIK1//GRIA3//KCNB1//ARF1//CPEB1//TMEM108//NRG1//CACNG4
GO:0048471	perinuclear region of cytoplasm	Cellular component	16	668	257	18698	1.74263	0.022691	0.278451	1.64415	0.0622568	HCN4//COL4A3BP//TSPAN1//CHGA//CLIC1//ARF1//MT1A//PLN//VPS35//PRKAR2B//RAB3B//CA4//MLPH//ARHGAP10//MOB2//SCEL
GO:0005887	integral component of plasma membrane	Cellular component	33	1678	257	18698	1.43082	0.0231075	0.279569	1.63625	0.128405	SCN11A//CHRNA3//KCNB1//KCNJ2//KCNJ5//KCNMA1//CNTN2//NPC1L1//HCN4//CACNG4//GRIA3//GRIK1//RAMP1//SLC17A4//TSPAN1//SLC26A3//EVI2B//FCGR2B//TNFRSF13B//VSIG2//GPR15//NRG1//AQP8//FAS//NGFR//ROR2//VAMP1//TAAR5//SLC28A2//CD69//CD79B//P2RY14//CLEC2B
GO:0033267	axon part	Cellular component	10	353	257	18698	2.06104	0.0246251	0.293791	1.60862	0.0389105	LRRK2//MYO5A//NRG1//CNTN2//SCGN//VAMP1//CALB2//SYNGR1//PNOC//TMEM108
GO:0043034	costamere	Cellular component	2	19	257	18698	7.65841	0.0275911	0.324668	1.55923	0.0077821	SYNM//PGM5
GO:0008328	ionotropic glutamate receptor complex	Cellular component	3	49	257	18698	4.45438	0.0297346	0.345163	1.52674	0.0116732	CACNG4//GRIA3//GRIK1
GO:0099512	supramolecular fiber	Cellular component	20	926	257	18698	1.57138	0.0310465	0.355586	1.50799	0.077821	MFAP5//MYH15//LMOD1//MYL2//CALD1//KRT24//SYNM//MYO5A//PRPH//KIF5C//ROR2//CEP170//KRTAP1-1//ABRA//ARF1//PGM5//MYH11//SYNPO2//NEXN//KAT2B
GO:0097060	synaptic membrane	Cellular component	9	317	257	18698	2.0656	0.0317077	0.356504	1.49884	0.0350195	GRIK1//CHRNA3//GRIA3//KCNB1//ARF1//KCNMA1//CPEB1//TMEM108//CACNG4
GO:0042383	sarcolemma	Cellular component	5	128	257	18698	2.84199	0.0319567	0.356504	1.49544	0.0194553	KCNJ2//KCNJ5//SYNM//KCNB1//PGM5
GO:0098878	neurotransmitter receptor complex	Cellular component	3	51	257	18698	4.2797	0.0329497	0.359995	1.48215	0.0116732	CACNG4//GRIA3//GRIK1
GO:0099081	supramolecular polymer	Cellular component	20	933	257	18698	1.55959	0.033209	0.359995	1.47874	0.077821	MFAP5//MYH15//LMOD1//MYL2//CALD1//KRT24//SYNM//MYO5A//PRPH//KIF5C//ROR2//CEP170//KRTAP1-1//ABRA//ARF1//PGM5//MYH11//SYNPO2//NEXN//KAT2B
GO:0099080	supramolecular complex	Cellular component	20	934	257	18698	1.55792	0.0335269	0.359995	1.47461	0.077821	MFAP5//KRT24//SYNM//MYO5A//PRPH//KIF5C//ROR2//CEP170//LMOD1//MYH15//MYL2//CALD1//KRTAP1-1//ABRA//ARF1//PGM5//MYH11//SYNPO2//NEXN//KAT2B
GO:0009898	cytoplasmic side of plasma membrane	Cellular component	6	176	257	18698	2.48028	0.0350017	0.368068	1.45591	0.0233463	SPTB//RGS19//GNAL//GNG3//GNG7//PGM5
GO:0005578	proteinaceous extracellular matrix	Cellular component	10	375	257	18698	1.94013	0.0351357	0.368068	1.45425	0.0389105	CCDC80//MATN2//DPT//EFEMP1//MAMDC2//MGP//SFTPA2//MMP28//MFAP5//SPARCL1
GO:0032982	myosin filament	Cellular component	2	22	257	18698	6.61408	0.0362849	0.374825	1.44027	0.0077821	MYH15//MYH11
GO:0044441	ciliary part	Cellular component	11	432	257	18698	1.85255	0.0371551	0.374825	1.42998	0.0428016	GUCA2B//MYO5A//CFAP54//GLI3//KIF5C//GSTM3//EVC//CYS1//SLC26A3//PRKAR2B//CEP170
GO:0098793	presynapse	Cellular component	10	379	257	18698	1.91965	0.0373385	0.374825	1.42784	0.0389105	RAB3B//GRIK1//SCGN//LRRK2//VAMP1//CALB2//SYNGR1//PNOC//SYN2//NAAA
GO:0098802	plasma membrane receptor complex	Cellular component	6	179	257	18698	2.43871	0.0375262	0.374825	1.42567	0.0233463	CHRNA3//CD79B//CACNG4//GRIA3//GRIK1//RAMP1
GO:0030133	transport vesicle	Cellular component	10	381	257	18698	1.90958	0.0384752	0.379887	1.41482	0.0389105	SCGN//CHGA//SCG3//HLA-DQB1//CA4//RAB3B//LRRK2//VAMP1//SYN2//SYNGR1
GO:0034706	sodium channel complex	Cellular component	2	23	257	18698	6.32651	0.0393874	0.383599	1.40464	0.0077821	SCN11A//GRIK1
GO:0098805	whole membrane	Cellular component	31	1630	257	18698	1.38368	0.0403692	0.383599	1.39395	0.120623	SLC36A1//SCGN//CHGA//SCG3//HLA-DQB1//CA4//VPS35//TMEM108//CD1B//CACNG4//GRIA3//RAB44//VNN1//SYNGR1//VAMP1//ROR2//ARF1//LRRK2//TSPAN1//CYBRD1//SYN2//SOX10//C3ORF58//KCNMA1//CHRNA3//RGS19//FYB2//GPM6B//FAS//PRKAR2B//RAB3B
GO:0016021	integral component of membrane	Cellular component	87	5369	257	18698	1.17893	0.0404371	0.383599	1.39322	0.338521	HCN4//SLC17A4//TSPAN1//RAMP1//CHRNA3//SLC26A3//EVI2B//FCGR2B//TNFRSF13B//VSIG2//CACNG4//GPR15//GRIK1//NRG1//AQP8//FAS//KCNJ2//NGFR//ROR2//VAMP1//CNTN2//TAAR5//SLC28A2//CD69//CD79B//P2RY14//CLEC2B//NPC1L1//HLA-DQB1//SCN11A//KCNB1//KCNJ5//KCNMA1//GRIA3//CLIC1//BEST3//PLN//CLDN34//NXPE2//SLC51B//PTCHD1//MFSD4A//SHISA3//APCDD1L//SLC36A1//EVC//PIGN//MS4A6E//GPM6B//C16ORF54//GPR27//CDH19//TRARG1//SHISA…
GO:0031253	cell projection membrane	Cellular component	9	332	257	18698	1.97227	0.0406373	0.383599	1.39107	0.0350195	SLC26A3//NPC1L1//CA4//CYBRD1//ARHGEF4//CYS1//EVC//NRG1//KCNB1
GO:0035577	azurophil granule membrane	Cellular component	3	58	257	18698	3.76318	0.045558	0.414846	1.34144	0.0116732	RAB44//VNN1//SYNGR1
GO:0000323	lytic vacuole	Cellular component	15	673	257	18698	1.62158	0.045778	0.414846	1.33934	0.0583658	LRRK2//MYO5A//VPS35//CHGA//TSPAN1//SLC36A1//HLA-DQB1//CYBRD1//CD1B//NAAA//TCN2//RAB44//VNN1//SYNGR1//GCA
GO:0005764	lysosome	Cellular component	15	673	257	18698	1.62158	0.045778	0.414846	1.33934	0.0583658	TSPAN1//SLC36A1//HLA-DQB1//VPS35//CYBRD1//CD1B//CHGA//NAAA//TCN2//LRRK2//RAB44//VNN1//SYNGR1//GCA//MYO5A
GO:0030137	COPI-coated vesicle	Cellular component	2	25	257	18698	5.82039	0.0458794	0.414846	1.33838	0.0077821	C3ORF58//ARF1

## Sheet: go MF down mRNA CA vs NC
Ontology	Count	Pop.Hits	List.Total	Pop.Total	Fold.Enrichment	Pvalue	FDR	Enrichment.Score	Gene.Ratio	GENES
Molecular function	4	14	226	17548	22.1846	2.42328e-05	0.0314057	4.6156	0.0176991	CA1//CA2//CA4//CA7
Molecular function	6	63	226	17548	7.39486	0.000157257	0.101903	3.80339	0.0265487	RAB39B//NPC1L1//RAB3B//MYL2//MLPH//CALD1
Molecular function	16	472	226	17548	2.63207	0.000424811	0.142831	3.3718	0.0707965	PNOC//GDF7//NRG1//IL16//GREM2//BMP3//INSL5//GCG//SST//VIP//CCL28//CCL21//EFEMP1//FGF10//MDK//SFRP2
Molecular function	7	109	226	17548	4.98644	0.000524714	0.142831	3.28008	0.0309735	GRIA3//HCN4//KCNJ2//KCNJ5//GRIK1//JPH3//CHRNA3
Molecular function	15	437	226	17548	2.6652	0.000563658	0.142831	3.24898	0.0663717	GRIA3//HCN4//CHRNA3//GRIK1//KCNJ2//KCNJ5//CACNG4//SCN11A//KCNB1//KCNMA1//CLIC1//BEST3//SLC26A3//AQP8//JPH3
Molecular function	16	502	226	17548	2.47477	0.000823305	0.142831	3.08444	0.0707965	PNOC//GDF7//NRG1//IL16//GREM2//BMP3//INSL5//GCG//SST//VIP//CCL28//CCL21//EFEMP1//FGF10//MDK//SFRP2
Molecular function	14	410	226	17548	2.65133	0.000901656	0.142831	3.04496	0.0619469	MYL2//PKNOX2//MYH15//MYH11//MYO5A//SPTB//NEXN//LRRK2//ABRA//SYNPO2//LMOD1//KCNMA1//MLPH//CALD1
Molecular function	15	463	226	17548	2.51553	0.00101361	0.142831	2.99413	0.0663717	GRIA3//HCN4//CHRNA3//GRIK1//KCNJ2//KCNJ5//SCN11A//CLIC1//CACNG4//KCNB1//KCNMA1//BEST3//SLC26A3//AQP8//JPH3
Molecular function	15	464	226	17548	2.51011	0.00103571	0.142831	2.98476	0.0663717	GRIA3//HCN4//CHRNA3//GRIK1//KCNJ2//KCNJ5//SCN11A//CLIC1//CACNG4//KCNB1//KCNMA1//BEST3//SLC26A3//AQP8//JPH3
Molecular function	14	424	226	17548	2.56378	0.0012414	0.142831	2.90609	0.0619469	GRIA3//HCN4//CHRNA3//GRIK1//KCNJ2//KCNJ5//CACNG4//SCN11A//KCNB1//KCNMA1//CLIC1//BEST3//SLC26A3//JPH3
Molecular function	3	17	226	17548	13.7022	0.00125438	0.142831	2.90157	0.0132743	RAB39B//NPC1L1//RAB3B
Molecular function	12	335	226	17548	2.78135	0.00139012	0.142831	2.85695	0.0530973	GRIA3//HCN4//CHRNA3//GRIK1//KCNJ2//KCNJ5//SCN11A//CLIC1//CACNG4//KCNB1//KCNMA1//JPH3
Molecular function	12	338	226	17548	2.75666	0.00149869	0.142831	2.82429	0.0530973	GRIA3//HCN4//CHRNA3//GRIK1//KCNJ2//KCNJ5//SCN11A//CLIC1//CACNG4//KCNB1//KCNMA1//JPH3
Molecular function	23	908	226	17548	1.9668	0.00154293	0.142831	2.81165	0.10177	LRRK2//ABRA//SYNPO2//LMOD1//KCNMA1//SPTB//MLPH//CALD1//MYL2//PKNOX2//MYH15//CCDC69//KIF5C//MYH11//MYO5A//SYNM//RAB39B//NPC1L1//RAB3B//TRIM36//NEXN//CDH19//EPB41L4A
Molecular function	4	42	226	17548	7.39486	0.00204331	0.176542	2.68967	0.0176991	ROR2//RAMP1//GPR15//NGFR
Molecular function	11	316	226	17548	2.70287	0.00271927	0.185619	2.56555	0.0486726	GRIA3//HCN4//KCNJ2//KCNJ5//CACNG4//SCN11A//KCNB1//KCNMA1//GRIK1//JPH3//CHRNA3
Molecular function	10	271	226	17548	2.86517	0.00277162	0.185619	2.55727	0.0442478	ROR2//RSPO3//CCL28//CCL21//PNOC//GNG3//VPS35//GCG//INSL5//GNAL
Molecular function	4	46	226	17548	6.75183	0.00286202	0.185619	2.54333	0.0176991	SYNM//MYH11//MYL2//NEXN
Molecular function	7	146	226	17548	3.72275	0.00286449	0.185619	2.54295	0.0309735	GRIA3//HCN4//CHRNA3//GRIK1//KCNJ2//KCNJ5//JPH3
Molecular function	7	146	226	17548	3.72275	0.00286449	0.185619	2.54295	0.0309735	GRIA3//HCN4//CHRNA3//GRIK1//KCNJ2//KCNJ5//JPH3
Molecular function	28	1263	226	17548	1.72137	0.00343213	0.210895	2.46444	0.123894	C15ORF48//GRIA3//HCN4//CHRNA3//GRIK1//KCNJ2//KCNJ5//SCN11A//CLIC1//CACNG4//KCNB1//KCNMA1//BEST3//SLC26A3//SLC36A1//CFHR4//PLTP//SLC28A2//MFSD4A//SLC17A4//RAMP1//VPS35//SLC51B//AQP8//JPH3//SLC9A2//TTPA//COL4A3BP
Molecular function	21	856	226	17548	1.90487	0.00358001	0.210895	2.44612	0.0929204	C15ORF48//GRIA3//HCN4//CHRNA3//GRIK1//KCNJ2//KCNJ5//CACNG4//SCN11A//KCNB1//KCNMA1//CLIC1//BEST3//SLC26A3//SLC36A1//SLC28A2//SLC17A4//SLC51B//AQP8//JPH3//SLC9A2
Molecular function	8	198	226	17548	3.13721	0.00420381	0.227006	2.37636	0.0353982	KCNJ2//KCNJ5//CACNG4//HCN4//KCNB1//KCNMA1//SCN11A//CLIC1
Molecular function	8	198	226	17548	3.13721	0.00420381	0.227006	2.37636	0.0353982	KCNJ2//KCNJ5//SCN11A//CLIC1//CACNG4//HCN4//KCNB1//KCNMA1
Molecular function	16	601	226	17548	2.06712	0.00498518	0.245791	2.30232	0.0707965	C15ORF48//GRIA3//HCN4//KCNJ2//KCNJ5//CACNG4//SCN11A//KCNB1//KCNMA1//SLC36A1//SLC28A2//SLC17A4//GRIK1//JPH3//SLC9A2//CHRNA3
Molecular function	12	393	226	17548	2.37087	0.0050905	0.245791	2.29324	0.0530973	C15ORF48//KCNJ2//KCNJ5//HCN4//SCN11A//KCNB1//KCNMA1//SLC36A1//SLC28A2//SLC17A4//GRIK1//SLC9A2
Molecular function	4	54	226	17548	5.75156	0.00512064	0.245791	2.29068	0.0176991	CA1//CA2//CA4//CA7
Molecular function	7	166	226	17548	3.27423	0.0057794	0.267504	2.23812	0.0309735	KCNJ2//KCNJ5//HCN4//KCNB1//KCNMA1//GRIK1//SLC9A2
Molecular function	6	129	226	17548	3.61144	0.00653519	0.29022	2.18474	0.0265487	KCNJ2//KCNJ5//HCN4//KCNB1//KCNMA1//GRIK1
Molecular function	2	10	226	17548	15.5292	0.00694199	0.29022	2.15852	0.00884956	KCNJ2//KCNJ5
Molecular function	2	10	226	17548	15.5292	0.00694199	0.29022	2.15852	0.00884956	COL4A3BP//PLTP
Molecular function	5	94	226	17548	4.13011	0.00735987	0.298075	2.13313	0.0221239	KCNJ2//KCNJ5//KCNB1//KCNMA1//HCN4
Molecular function	3	33	226	17548	7.05873	0.00865206	0.33979	2.06288	0.0132743	CDKN2B//KAT2B//PRKAR2B
Molecular function	4	65	226	17548	4.77822	0.0098264	0.360379	2.00761	0.0176991	ZFPM2//POU2AF1//MYOCD//SOX10
Molecular function	2	12	226	17548	12.941	0.0100105	0.360379	1.99954	0.00884956	CDKN2B//KAT2B
Molecular function	2	12	226	17548	12.941	0.0100105	0.360379	1.99954	0.00884956	KCNJ5//KCNJ2
Molecular function	6	143	226	17548	3.25787	0.0105907	0.370959	1.97508	0.0265487	KCNJ2//KCNJ5//CACNG4//HCN4//KCNB1//KCNMA1
Molecular function	16	663	226	17548	1.87381	0.0121535	0.403476	1.9153	0.0707965	C15ORF48//GRIA3//HCN4//KCNJ2//KCNJ5//CACNG4//SCN11A//KCNB1//KCNMA1//SLC36A1//SLC28A2//SLC17A4//GRIK1//JPH3//SLC9A2//CHRNA3
Molecular function	20	900	226	17548	1.72547	0.0125552	0.403476	1.90118	0.0884956	C15ORF48//GRIA3//HCN4//CHRNA3//GRIK1//KCNJ2//KCNJ5//SCN11A//CLIC1//CACNG4//KCNB1//KCNMA1//BEST3//SLC26A3//SLC36A1//SLC28A2//SLC17A4//SLC51B//JPH3//SLC9A2
Molecular function	3	38	226	17548	6.12995	0.0127643	0.403476	1.894	0.0132743	CHRNA3//GRIA3//GRIK1
Molecular function	3	38	226	17548	6.12995	0.0127643	0.403476	1.894	0.0132743	CHRNA3//GRIA3//GRIK1
Molecular function	2	14	226	17548	11.0923	0.013571	0.418762	1.86739	0.00884956	LMOD1//CALD1
Molecular function	4	72	226	17548	4.31367	0.0139314	0.419886	1.856	0.0176991	CA1//CA2//CA4//CA7
Molecular function	3	40	226	17548	5.82345	0.0146718	0.43215	1.83352	0.0132743	CHRNA3//GRIA3//GRIK1
Molecular function	12	457	226	17548	2.03885	0.0156486	0.450679	1.80553	0.0530973	KCNJ2//KCNJ5//CACNG4//HCN4//SCN11A//KCNB1//KCNMA1//SLC28A2//SLC17A4//GRIK1//JPH3//SLC9A2
Molecular function	6	158	226	17548	2.94858	0.0166375	0.468742	1.77891	0.0265487	CCDC80//FGF10//MDK//LXN//GREM2//RSPO3
Molecular function	6	161	226	17548	2.89364	0.0180834	0.47641	1.74272	0.0265487	HCN4//SCN11A//SLC28A2//SLC17A4//GRIK1//SLC9A2
Molecular function	9	308	226	17548	2.26888	0.0186501	0.47641	1.72932	0.039823	FCGR2B//GRIA3//ITM2A//HLA-DQB1//GSTM3//CD1B//COL4A3BP//PLTP//RAMP1
Molecular function	3	44	226	17548	5.29405	0.0189455	0.47641	1.72249	0.0132743	ZFPM2//POU2AF1//MYOCD
Molecular function	11	415	226	17548	2.05809	0.0190084	0.47641	1.72105	0.0486726	SSBP2//GLI3//HOXD13//MEIS1//MEOX2//EBF4//MYOCD//HAND2//ZFPM2//INSM1//FOXP2
Molecular function	6	163	226	17548	2.85814	0.0190939	0.47641	1.71911	0.0265487	GDF7//EFEMP1//FGF10//NRG1//MDK//BMP3
Molecular function	2	17	226	17548	9.13483	0.0197754	0.47641	1.70388	0.00884956	COL4A3BP//PLTP
Molecular function	22	1068	226	17548	1.59945	0.0200711	0.47641	1.69743	0.0973451	C15ORF48//GRIA3//HCN4//CHRNA3//GRIK1//KCNJ2//KCNJ5//SCN11A//CLIC1//CACNG4//KCNB1//KCNMA1//BEST3//SLC26A3//SLC36A1//SLC28A2//MFSD4A//SLC17A4//SLC51B//AQP8//JPH3//SLC9A2
Molecular function	3	45	226	17548	5.1764	0.0201103	0.47641	1.69658	0.0132743	HCN4//SCN11A//GRIK1
Molecular function	5	121	226	17548	3.20851	0.020218	0.47641	1.69426	0.0221239	PNOC//VIP//INSL5//GCG//SST
Molecular function	8	266	226	17548	2.33522	0.022214	0.514095	1.65337	0.0353982	GYS1//SFTPA2//KLRC3//LGALS2//SI//CNTN2//CD69//CLEC2B
Molecular function	3	48	226	17548	4.85288	0.0238364	0.525302	1.62276	0.0132743	GRIA3//GRIK1//CHRNA3
Molecular function	7	220	226	17548	2.47056	0.0241096	0.525302	1.61781	0.0309735	CCL28//CCL21//GDF7//NRG1//IL16//GREM2//BMP3
Molecular function	2	19	226	17548	8.17327	0.02445	0.525302	1.61172	0.00884956	GRIA3//GRIK1
Molecular function	2	19	226	17548	8.17327	0.02445	0.525302	1.61172	0.00884956	GRIA3//GRIK1
Molecular function	15	662	226	17548	1.75935	0.0247248	0.525302	1.60687	0.0663717	SSBP2//GLI3//HOXD13//INSM1//MEIS1//MEOX2//SOX10//FOXP2//POU2AF1//SPIB//HAND2//IKZF3//HOXD9//PKNOX2//KAT2B
Molecular function	6	174	226	17548	2.67745	0.0253447	0.526743	1.59611	0.0265487	MYH15//MYH11//MYO5A//PKNOX2//SPTB//NEXN
Molecular function	15	665	226	17548	1.75141	0.0256056	0.526743	1.59167	0.0663717	IKZF3//GLI3//HOXD9//PKNOX2//KAT2B//HAND2//SSBP2//HOXD13//INSM1//MEIS1//MEOX2//SOX10//FOXP2//POU2AF1//SPIB
Molecular function	3	50	226	17548	4.65876	0.0265137	0.536903	1.57653	0.0132743	PRKAR2B//C2ORF88//LRRK2
Molecular function	8	279	226	17548	2.22641	0.0284498	0.567245	1.54592	0.0353982	SSBP2//GLI3//HOXD13//MEIS1//MEOX2//EBF4//MYOCD//HAND2
Molecular function	2	21	226	17548	7.39486	0.0295267	0.579796	1.52979	0.00884956	KCNJ2//KCNJ5
Molecular function	16	740	226	17548	1.67883	0.0302673	0.58547	1.51903	0.0707965	IKZF3//GLI3//HOXD9//PKNOX2//KAT2B//HAND2//SSBP2//HOXD13//INSM1//MEIS1//MEOX2//SOX10//FOXP2//POU2AF1//SPIB//MYOCD
Molecular function	5	136	226	17548	2.85463	0.031432	0.599058	1.50263	0.0221239	PLTP//SLC51B//TTPA//COL4A3BP//CFHR4
Molecular function	7	235	226	17548	2.31286	0.0328536	0.607092	1.48342	0.0309735	CCDC80//FGF10//MDK//LXN//GREM2//RSPO3//GSTM3
Molecular function	33	1848	226	17548	1.38654	0.0331514	0.607092	1.4795	0.146018	PNOC//PLN//CDKN2B//KAT2B//PRKAR2B//ARHGEF4//FGF10//NRG1//SPTB//RGS19//CDC42EP1//ACAP3//LRRK2//RGS13//ARHGAP10//GDF7//IL16//GREM2//BMP3//INSL5//GCG//SST//VIP//CCL28//CCL21//HSPB2//GUCA2B//EFEMP1//MDK//LXN//CACNG4//SFRP2//ARF1
Molecular function	4	94	226	17548	3.30409	0.0332589	0.607092	1.47809	0.0176991	MEOX2//SOX10//SPIB//HOXD13
Molecular function	2	23	226	17548	6.75183	0.0349819	0.628801	1.45616	0.00884956	HCN4//SCN11A
Molecular function	3	57	226	17548	4.08663	0.0370934	0.628801	1.4307	0.0132743	FCGR2B//GRIA3//ITM2A
Molecular function	3	57	226	17548	4.08663	0.0370934	0.628801	1.4307	0.0132743	GRIA3//GRIK1//CHRNA3
Molecular function	3	57	226	17548	4.08663	0.0370934	0.628801	1.4307	0.0132743	GRIA3//GRIK1//CHRNA3
Molecular function	2	24	226	17548	6.4705	0.0378445	0.628801	1.422	0.00884956	FAS//NGFR
Molecular function	2	24	226	17548	6.4705	0.0378445	0.628801	1.422	0.00884956	FAS//NGFR
Molecular function	2	24	226	17548	6.4705	0.0378445	0.628801	1.422	0.00884956	HCN4//PRKAR2B
Molecular function	8	297	226	17548	2.09148	0.0389474	0.638934	1.40952	0.0353982	RAB39B//LRRK2//GNAL//GNG3//ARF1//RAB44//DIRAS2//RAB3B
Molecular function	4	101	226	17548	3.07509	0.0415869	0.673707	1.38104	0.0176991	MEOX2//SPIB//MEIS1//SOX10
Molecular function	6	198	226	17548	2.35291	0.0433712	0.681543	1.3628	0.0265487	MYH15//FAS//MYH11//MYO5A//NGFR//CALD1
Molecular function	16	776	226	17548	1.60095	0.0435929	0.681543	1.36058	0.0707965	IKZF3//GLI3//HOXD9//PKNOX2//KAT2B//HAND2//SSBP2//HOXD13//INSM1//MEIS1//MEOX2//SOX10//FOXP2//POU2AF1//SPIB//MYOCD
Molecular function	2	26	226	17548	5.97277	0.0438257	0.681543	1.35827	0.00884956	CCDC80//SFRP2
Molecular function	10	417	226	17548	1.86201	0.0441741	0.681543	1.35483	0.0442478	SSBP2//GLI3//HOXD13//MEIS1//MEOX2//EBF4//MYOCD//HAND2//SPIB//IKZF3
Molecular function	2	27	226	17548	5.75156	0.0469391	0.707362	1.32846	0.00884956	MYL2//PKNOX2
Molecular function	2	27	226	17548	5.75156	0.0469391	0.707362	1.32846	0.00884956	GRIA3//GRIK1
Molecular function	21	1108	226	17548	1.47163	0.0490788	0.731104	1.30911	0.0929204	SSBP2//GLI3//HOXD13//MEIS1//MEOX2//EBF4//MYOCD//HAND2//ZFPM2//INSM1//FOXP2//SPIB//HOXD9//IKZF3//SOX10//KLF2//TLX3//POU3F3//MBNL3//PKNOX2//DMRTA1

## Sheet: KEGG down mRNA CA vs NC
PathwayID	Definition	OriginalWebSite	Fisher-Pvalue	SelectionCounts	SelectionSize	Count	Size	FDR	Enrichment_Score	GeneRatio	Genes
hsa00910	Nitrogen metabolism - Homo sapiens (human)	http://www.genome.jp/kegg-bin/show_pathway?hsa00910+759+760+762+766	5.73308e-05	4	97	17	7420	0.0188045	4.24161	0.041237	CA1//CA2//CA4//CA7
hsa04672	Intestinal immune network for IgA production - Homo sapiens (human)	http://www.genome.jp/kegg-bin/show_pathway?hsa04672+56477+3119+23495+608	0.00370749	4	97	49	7420	0.533151	2.43092	0.041237	CCL28//HLA-DQB1//TNFRSF13B//TNFRSF17
hsa04060	Cytokine-cytokine receptor interaction - Homo sapiens (human)	http://www.genome.jp/kegg-bin/show_pathway?hsa04060+651+6366+56477+355+151449+3603+7850+4804+23495+608	0.00487638	10	97	294	7420	0.533151	2.3119	0.103093	BMP3//CCL21//CCL28//FAS//GDF7//IL16//IL1R2//NGFR//TNFRSF13B//TNFRSF17
hsa04728	Dopaminergic synapse - Homo sapiens (human)	http://www.genome.jp/kegg-bin/show_pathway?hsa04728+2774+2785+2788+2892+3762+3800	0.00719278	6	97	131	7420	0.589808	2.1431	0.061856	GNAL//GNG3//GNG7//GRIA3//KCNJ5//KIF5C
hsa04975	Fat digestion and absorption - Homo sapiens (human)	http://www.genome.jp/kegg-bin/show_pathway?hsa04975+2169+29881+8399	0.0161246	3	97	41	7420	1	1.79251	0.030928	FABP2//NPC1L1//PLA2G10
hsa04270	Vascular smooth muscle contraction - Homo sapiens (human)	http://www.genome.jp/kegg-bin/show_pathway?hsa04270+800+3778+4629+8399+10267	0.0208088	5	97	121	7420	1	1.68175	0.051546	CALD1//KCNMA1//MYH11//PLA2G10//RAMP1
hsa05204	Chemical carcinogenesis - Homo sapiens (human)	http://www.genome.jp/kegg-bin/show_pathway?hsa05204+125+100861540+2947+27306	0.0220986	4	97	82	7420	1	1.65564	0.041237	ADH1B//CYP3A7-CYP3A51P//GSTM3//HPGDS
hsa04978	Mineral absorption - Homo sapiens (human)	http://www.genome.jp/kegg-bin/show_pathway?hsa04978+79901+4489+1811	0.0286976	3	97	51	7420	1	1.54216	0.030928	CYBRD1//MT1A//SLC26A3
hsa04964	Proximal tubule bicarbonate reclamation - Homo sapiens (human)	http://www.genome.jp/kegg-bin/show_pathway?hsa04964+760+762	0.0358089	2	97	23	7420	1	1.44601	0.020619	CA2//CA4
hsa05150	Staphylococcus aureus infection - Homo sapiens (human)	http://www.genome.jp/kegg-bin/show_pathway?hsa05150+717+2213+3119	0.036468	3	97	56	7420	1	1.43809	0.030928	C2//FCGR2B//HLA-DQB1
hsa04713	Circadian entrainment - Homo sapiens (human)	http://www.genome.jp/kegg-bin/show_pathway?hsa04713+2785+2788+2892+3762	0.0366034	4	97	96	7420	1	1.43648	0.041237	GNG3//GNG7//GRIA3//KCNJ5
hsa04972	Pancreatic secretion - Homo sapiens (human)	http://www.genome.jp/kegg-bin/show_pathway?hsa04972+760+3778+8399+1811	0.0366034	4	97	96	7420	1	1.43648	0.041237	CA2//KCNMA1//PLA2G10//SLC26A3
hsa04723	Retrograde endocannabinoid signaling - Homo sapiens (human)	http://www.genome.jp/kegg-bin/show_pathway?hsa04723+2785+2788+2892+3762+4717	0.0440778	5	97	148	7420	1	1.35578	0.051546	GNG3//GNG7//GRIA3//KCNJ5//NDUFC1

## Sheet: KEGG up mRNA CA vs NC
PathwayID	Definition	OriginalWebSite	Fisher-Pvalue	SelectionCounts	SelectionSize	Count	Size	FDR	Enrichment_Score	GeneRatio	Genes
hsa05224	Breast cancer - Homo sapiens (human)	http://www.genome.jp/kegg-bin/show_pathway?hsa05224+672+675+9965+4851+7481	0.00562025	5	58	147	7420	0.76182	2.25024	0.086207	BRCA1//BRCA2//FGF19//NOTCH1//WNT11
hsa04657	IL-17 signaling pathway - Homo sapiens (human)	http://www.genome.jp/kegg-bin/show_pathway?hsa04657+3326+27189+6280+7186	0.00585539	4	58	93	7420	0.76182	2.23244	0.068966	HSP90AB1//IL17C//S100A9//TRAF2
hsa05200	Pathways in cancer - Homo sapiens (human)	http://www.genome.jp/kegg-bin/show_pathway?hsa05200+675+894+6921+9965+3326+4851+5468+6469+7186+7481	0.00696786	10	58	526	7420	0.76182	2.1569	0.172414	BRCA2//CCND2//ELOC//FGF19//HSP90AB1//NOTCH1//PPARG//SHH//TRAF2//WNT11
hsa05165	Human papillomavirus infection - Homo sapiens (human)	http://www.genome.jp/kegg-bin/show_pathway?hsa05165+890+894+1297+3381+3680+4851+7481	0.0158228	7	58	339	7420	0.881587	1.80072	0.12069	CCNA2//CCND2//COL9A1//IBSP//ITGA9//NOTCH1//WNT11
hsa03320	PPAR signaling pathway - Homo sapiens (human)	http://www.genome.jp/kegg-bin/show_pathway?hsa03320+4199+5468+6319	0.0184698	3	58	72	7420	0.881587	1.73354	0.051724	ME1//PPARG//SCD
hsa04151	PI3K-Akt signaling pathway - Homo sapiens (human)	http://www.genome.jp/kegg-bin/show_pathway?hsa04151+672+894+1297+9965+3326+3381+3680	0.019624	7	58	354	7420	0.881587	1.70721	0.12069	BRCA1//CCND2//COL9A1//FGF19//HSP90AB1//IBSP//ITGA9
hsa00052	Galactose metabolism - Homo sapiens (human)	http://www.genome.jp/kegg-bin/show_pathway?hsa00052+2683+2720	0.0241514	2	58	31	7420	0.881587	1.61706	0.034483	B4GALT1//GLB1
hsa04514	Cell adhesion molecules (CAMs) - Homo sapiens (human)	http://www.genome.jp/kegg-bin/show_pathway?hsa04514+1001+9076+3680+1462	0.025712	4	58	144	7420	0.881587	1.58986	0.068966	CDH3//CLDN1//ITGA9//VCAN
hsa04512	ECM-receptor interaction - Homo sapiens (human)	http://www.genome.jp/kegg-bin/show_pathway?hsa04512+1297+3381+3680	0.0259691	3	58	82	7420	0.881587	1.58554	0.051724	COL9A1//IBSP//ITGA9
hsa04310	Wnt signaling pathway - Homo sapiens (human)	http://www.genome.jp/kegg-bin/show_pathway?hsa04310+894+85409+8840+7481	0.0268777	4	58	146	7420	0.881587	1.57061	0.068966	CCND2//NKD2//WISP1//WNT11
hsa03030	DNA replication - Homo sapiens (human)	http://www.genome.jp/kegg-bin/show_pathway?hsa03030+1763+5983	0.0319197	2	58	36	7420	0.951788	1.49594	0.034483	DNA2//RFC3
hsa03440	Homologous recombination - Homo sapiens (human)	http://www.genome.jp/kegg-bin/show_pathway?hsa03440+672+675	0.0405315	2	58	41	7420	1	1.39221	0.034483	BRCA1//BRCA2
hsa04914	Progesterone-mediated oocyte maturation - Homo sapiens (human)	http://www.genome.jp/kegg-bin/show_pathway?hsa04914+890+3326+4085	0.0419352	3	58	99	7420	1	1.37742	0.051724	CCNA2//HSP90AB1//MAD2L1
